# Supplementary material for: Entropy‐Induced Selectivity Switch in Gold Catalysis: Fast Access to Indolo[1,2‐a]quinolines
Source: PubMed Central journal article supplement — Chemistry. 2022 Aug 1;28(55):e202201816. doi: 10.1002/chem.202201816 (PMC9804639; doi:10.1002/chem.202201816), 2022-08-01
Supplement: CHEM-28-0-s001.pdf [file CHEM-28-0-s001.pdf]

# Chemistry–A European Journal

Supporting Information

## Entropy-Induced Selectivity Switch in Gold Catalysis: Fast Access to Indolo[1,2-*a*]quinolines

Robin Heckershoff, Garrett May, Janika Däumer, Lukas Eberle, Petra Krämer,  
Frank Rominger, Matthias Rudolph, Florian F. Mulks,\* and A. Stephen K. Hashmi\*

## Table of Contents

|     |                                                        |     |
|-----|--------------------------------------------------------|-----|
| 1   | Experimental Procedures .....                          | 2   |
| 1.1 | General Information .....                              | 2   |
| 1.2 | Catalyst Screening .....                               | 4   |
| 1.3 | Synthesis Strategies .....                             | 7   |
| 1.4 | General Procedures .....                               | 8   |
| 1.5 | Synthesis of Compounds .....                           | 10  |
| 2   | NMR Spectra .....                                      | 44  |
| 3   | UV-Vis and Fluorescence Spectra .....                  | 93  |
| 4   | Crystallographic Data .....                            | 108 |
| 5   | Computational Investigation .....                      | 110 |
| 5.1 | Computational Details .....                            | 110 |
| 5.2 | Overview of the Computed Molecules .....               | 111 |
| 5.3 | Frontier Orbitals of 2a/f/h/o/r, 6, 8, 10 and 12 ..... | 113 |
| 6   | References .....                                       | 115 |

# 1 Experimental Procedures

## 1.1 General Information

Chemicals were bought from commercial suppliers (abcr, Acros, Alfa Aesar, Carbolution, Chempur, Fluka, Merck, Sigma Aldrich and TCI) and used as delivered. Anhydrous solvents were dispensed from a solvent purification system MB SPS-800. Solvents were degassed by freeze-pump-thaw technique. Deuterated solvents were bought from Euriso Top and Sigma Aldrich.

Melting points (mp) were measured in open glass capillaries on a Stuart SMP10 melting point apparatus and are uncorrected.

$R_f$ -values were determined by analytical thin layer chromatography (TLC) on aluminum sheets coated with silica gel produced by Macherey-Nagel (ALUGRAM® Xtra SIL G/25 UV<sub>254</sub>). Detection was accomplished using UV-light (254 and 365 nm) or a TLC staining solution (vanillin or ninhydrine).

Nuclear magnetic resonance (NMR) spectra were, if not mentioned otherwise, recorded at room temperature at the chemistry department of Heidelberg University under the supervision of Dr. J. Graf on the following spectrometers: Bruker Avance III 300 (300 MHz), Bruker Avance DRX 300 (300 MHz), Bruker Fourier 300 (300 MHz), Bruker Avance III 400 (400 MHz), Bruker Avance III 500 (500 MHz), Bruker Avance III 600 (600 MHz), Bruker Avance NEO 700 (700 MHz). For sensitive compounds CDCl<sub>3</sub> was filtered through a plug of aluminum oxide to remove acid impurities and the NMR sample was prepared under an atmosphere of argon. Chemical shifts ( $\delta$ ) are given in ppm and coupling constants  $J$  in Hz. Spectra were referenced to residual solvent protons according to Fulmer *et al.*<sup>[1]</sup> The following abbreviations were used to describe the observed multiplicities: for <sup>1</sup>H NMR spectra: s = singlet, d = doublet, t = triplet, q = quartet, quint = quintet, sext = sextet, sept = septet, m = multiplet, dd = doublet of doublets, td = triplet of doublets, dt = doublet of triplets, br = broad signal; for <sup>13</sup>C NMR spectra: s = quaternary carbon, d = CH carbon, t = CH<sub>2</sub> carbon and q = CH<sub>3</sub> carbon. <sup>13</sup>C NMR spectra are proton decoupled (if necessary, <sup>19</sup>F is proton decoupled as well) and interpreted with help of DEPT- and 2D spectra. All <sup>19</sup>F spectra are proton decoupled. All spectra were integrated and processed using Bruker TopSpin 4.1.1 software.

High-resolution mass spectra (HR-MS) were recorded at the chemistry department of Heidelberg University under the supervision of Dr. J. Gross on the following spectrometers: JEOL AccuTOF GCx (EI), Bruker ApexQe hybrid 9.4 T FT-ICR (ESI, MALDI, DART), Finnigan LCQ (ESI) and Bruker AutoFlex Speed (MALDI).

Infrared spectra were recorded from a neat powder or oil on a FT-IR spectrometer (Bruker LUMOS) with a Germanium ATR-crystal. For the most significant bands the wave numbers are given.

UV-Vis spectra were recorded on a Jasco UV-Vis V-670. Fluorescence spectra were recorded on a Jasco FP6500. Quantum yields (QY) were recorded on a Jasco FP-8600 fluorescence spectrometer equipped with a ILF-835 100 mm dia. integrating sphere.

X-ray crystallography was carried out at the chemistry department of Heidelberg University under the supervision of Dr. F. Rominger on the following instruments: Bruker Smart APEX II Quazar (with Mo-

microsource) and Stoe Stadivari (with Co-microsource and Pilatus detector). The structures were processed with Mercury 4.3.0.

For flash column chromatography silica gel (Sigma-Aldrich, pore size 60 Å, 70–230 mesh, 63–200 µm) or aluminum oxide (Honeywell, pore size 60 Å, activated, neutral) was used as stationary phase. As eluents different mixtures of petroleum ether (PE), ethyl acetate (EA), DCM or MeOH were used.

All reactions were performed under air, if not otherwise specified. For handling of air and moisture sensitive reagents, standard Schlenk techniques with flame-dried glassware under an argon or nitrogen atmosphere were used.

## 1.2 Catalyst Screening

### Detailed description of the catalyst and conditions screening

First, we tried to find an appropriate solvent for the reaction with the focus on a relatively high boiling point due to the demand for high temperature as seen in the previous results. With chlorobenzene, *N,N*-dimethylformamide, nitrobenzene and xylenes at 150 °C oil bath temperature little conversion was achieved and only trace amounts of **2a** could be detected. With 1,1,2,2-tetrachloroethane (TCE), anisole and *o*-dichlorobenzene (ODCB) all of the starting material was consumed and for anisole and ODCB a higher selectivity for **2a** (>50%) was observed, whereas TCE only led to trace amounts of product. Because of its higher temperature range ODCB was chosen as the appropriate solvent for the further screening of catalysts and conditions.

For the optimization of the selectivity, we tested a number of gold catalysts (Figure S1) at different temperatures and compared the product distribution after 90 min of reaction time (Table S1). The ratio of the desired product **2a**, the major side products **3a** and **3b** and the starting material **1a** was easily determined by the comparison of characteristic signals in the <sup>1</sup>H NMR spectra. First, AgNTf<sub>2</sub> and AgSbF<sub>6</sub>, that were used as halide scavengers, as well as a blank test without any catalyst showed that silver catalysis and thermal activation can be excluded (Table S1, entries 1–3). PicAuCl<sub>2</sub> and XPhosAuCl/AgNTf<sub>2</sub> did not show significant reactivity at 140 °C (entries 4, 5). With the well-established NHC catalyst IPrAuNTf<sub>2</sub> full conversion was observed, but only trace amounts of **2a** were detected alongside a mixture of **3a/b** (entry 6). To our surprise higher temperatures changed the product distribution dramatically. At 160 °C more than half of the product mixture consist of **2a** and at 180 °C **2a** is produced almost exclusively (entries 7, 8). By changing the counter ion to SbF<sub>6</sub> an improved selectivity at lower temperatures was feasible and using the pre-activated counterpart IPrAu(MeCN)SbF<sub>6</sub> showed the best result for IPr catalysts (entries 9–11). In comparison to the temperature, the sterical demand of the catalyst seems not to be a significant factor and the even bulkier ligands IPr\* (1,3-bis(2,6-bis(diphenylmethyl)-4-methylphenyl)imidazo-2-ylidene)<sup>[2]</sup> and 9-Dipp (6,8-bis(2,6-diisopropylphenyl)-5,6,8,9-tetrahydro-7*H*-dibenzo[*e,g*][1,3]diazonin-7-ylidene)<sup>[3]</sup> showed no improvement compared to the IPr catalysts (entries 12–16). The electron-poor phosphite ligand TDBPP (tris(2,4-ditert-butylphenyl) phosphite) did not perform well (entries 17, 18), but JohnPhosAu(MeCN)SbF<sub>6</sub> achieved full selectivity at 160 °C and even outperformed the other catalyst at 140 °C (entries 19, 20). Lowering the temperature even further results in higher proportion of dimers, whereby at 70 °C only partial conversion is observed and the product distribution is dominated by **3a/3b** (entries 21–23). It is noteworthy, that for different catalyst also the ratio between **3a** and **3b** is changing significantly.

To test for concentration dependency we compared the reaction of **1a** and 5 mol% JohnPhosAu(MeCN)SbF<sub>6</sub> with three different substrate concentrations in ODCB at 140 °C for 4 h. While concentrations of 1.02 and 10.2 μmol/mL did not show significant differences, using a substrate concentration of 102 μmol/mL produced a high amount of dimeric products (entries 24–26).

With lowering of the catalyst loading to 5 mol% full conversion was still achieved after 90 min at 170 °C and with 2.5 mol% after 180 min. With 1 mol% only 35% (90 min) and 40% (180 min) conversion was observed, which can be explained by the ongoing decomposition of the catalyst at these high temperatures. IPrAu(MeCN)SbF<sub>6</sub> showed similar results with lower yields, whereas

$\text{IPr}^*\text{Au}(\text{MeCN})\text{SbF}_6$  seems to be more temperature stable, but necessitates 2 days to achieve full conversion with a loading of 1 mol%.

At last, we tried to reduce the amount of the green decomposition product, which always occurred as a significant impurity. In assumption of an oxygen triggered decomposition, we compared two reactions of **1a** with  $\text{JohnPhosAu}(\text{MeCN})\text{SbF}_6$  (2.5 mol%) on the one hand using commercial available ODCB under *open flask* conditions and on the other hand using degassed ODCB under an argon atmosphere. The crude products already differ strongly by color (deep green and bright yellow) and after purification the yield of **2a** for the reaction under oxygen-free condition was clearly higher (91%) than under *open flask* condition (84%).

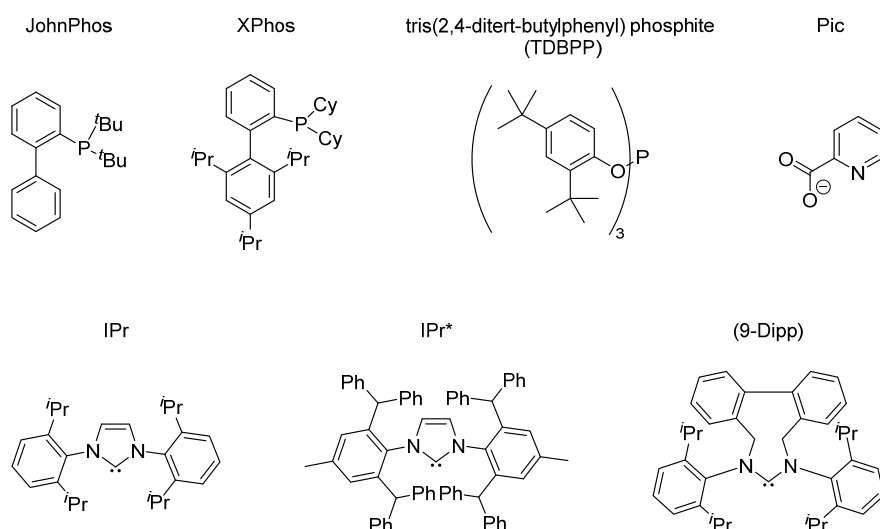

**Figure S1.** Structures of ligands used for gold-catalysts.

**Table S1.** Optimization of the reaction conditions for the synthesis of **2a**.<sup>[a]</sup>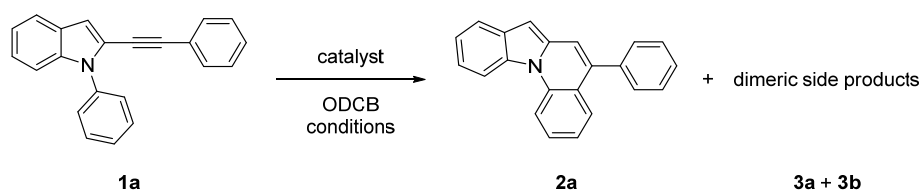

| Entry                 | Catalyst                                  | Temperature [°C] | Molar Ratio <sup>[b]</sup> |            |       |       |
|-----------------------|-------------------------------------------|------------------|----------------------------|------------|-------|-------|
|                       |                                           |                  | 1a                         | 2a         | 3a    | 3b    |
| 1                     | -                                         | 180              | 100                        | 0          | 0     | 0     |
| 2                     | AgNTf <sub>2</sub>                        | 180              | 100                        | 0          | 0     | 0     |
| 3                     | AgSbF <sub>6</sub>                        | 180              | 100                        | 0          | 0     | 0     |
| 4                     | PicAuCl <sub>2</sub>                      | 140              | 100                        | 0          | 0     | 0     |
| 5                     | XPhosAuCl/AgNTf <sub>2</sub>              | 140              | 100                        | trace      | trace | trace |
| 6                     | IPrAuNTf <sub>2</sub>                     | 140              | 0                          | trace      | 30    | 70    |
| 7                     | IPrAuNTf <sub>2</sub>                     | 160              | 0                          | 55         | 18    | 27    |
| 8                     | IPrAuNTf <sub>2</sub>                     | 180              | 0                          | 97         | 1     | 2     |
| 9                     | IPrAuCl/AgSbF <sub>6</sub>                | 160              | 4                          | 81         | 6     | 9     |
| 10                    | IPrAu(MeCN)SbF <sub>6</sub>               | 140              | 0                          | 49         | 21    | 30    |
| 11                    | IPrAu(MeCN)SbF <sub>6</sub>               | 160              | 0                          | <b>100</b> | trace | trace |
| 12                    | IPr <sup>*</sup> Au(MeCN)SbF <sub>6</sub> | 120              | 0                          | 18         | 42    | 40    |
| 13                    | IPr <sup>*</sup> Au(MeCN)SbF <sub>6</sub> | 140              | 0                          | 34         | 35    | 31    |
| 14                    | IPr <sup>*</sup> Au(MeCN)SbF <sub>6</sub> | 160              | 0                          | <b>100</b> | trace | trace |
| 15                    | (9-Dipp)AuCl/AgSbF <sub>6</sub>           | 140              | 64                         | 0          | 14    | 22    |
| 16                    | (9-Dipp)AuCl/AgSbF <sub>6</sub>           | 160              | 0                          | 94         | 0     | 6     |
| 17                    | TDBPPAuCl/AgNTf <sub>2</sub>              | 140              | 90                         | 10         | trace | trace |
| 18                    | TDBPPAuCl/AgSbF <sub>6</sub>              | 160              | 65                         | 17         | 8     | 10    |
| 19                    | JohnPhosAu(MeCN)SbF <sub>6</sub>          | 140              | 0                          | 85         | 12    | 3     |
| 20                    | JohnPhosAu(MeCN)SbF <sub>6</sub>          | 160              | 0                          | <b>100</b> | trace | trace |
| 21                    | JohnPhosAu(MeCN)SbF <sub>6</sub>          | 135              | 0                          | 84         | 13    | 3     |
| 22                    | JohnPhosAu(MeCN)SbF <sub>6</sub>          | 100              | 0                          | 68         | 25    | 7     |
| 23                    | JohnPhosAu(MeCN)SbF <sub>6</sub>          | 70               | 85                         | trace      | 12    | 3     |
| 24 <sup>[c],[d]</sup> | JohnPhosAu(MeCN)SbF <sub>6</sub>          | 140              | 0                          | 61         | 30    | 9     |
| 25 <sup>[c],[e]</sup> | JohnPhosAu(MeCN)SbF <sub>6</sub>          | 140              | 0                          | 93         | 7     | 1     |
| 26 <sup>[c],[f]</sup> | JohnPhosAu(MeCN)SbF <sub>6</sub>          | 140              | 0                          | 95         | 5     | trace |

<sup>[a]</sup>The reactions were performed using **1a** (17.0 μmol) and 10 mol% catalyst in 10.0 mL ODCB for 90 min, if not stated otherwise; <sup>[b]</sup>determined by <sup>1</sup>H NMR spectroscopy; <sup>[c]</sup>5 mol% catalyst was used and the mixture was heated for 4 h; <sup>[d]</sup>**1a** (1.02 μmol/mL); <sup>[e]</sup>**1a** (10.2 μmol/mL) <sup>[f]</sup>**1a** (102 μmol/mL).

### 1.3 Synthesis Strategies

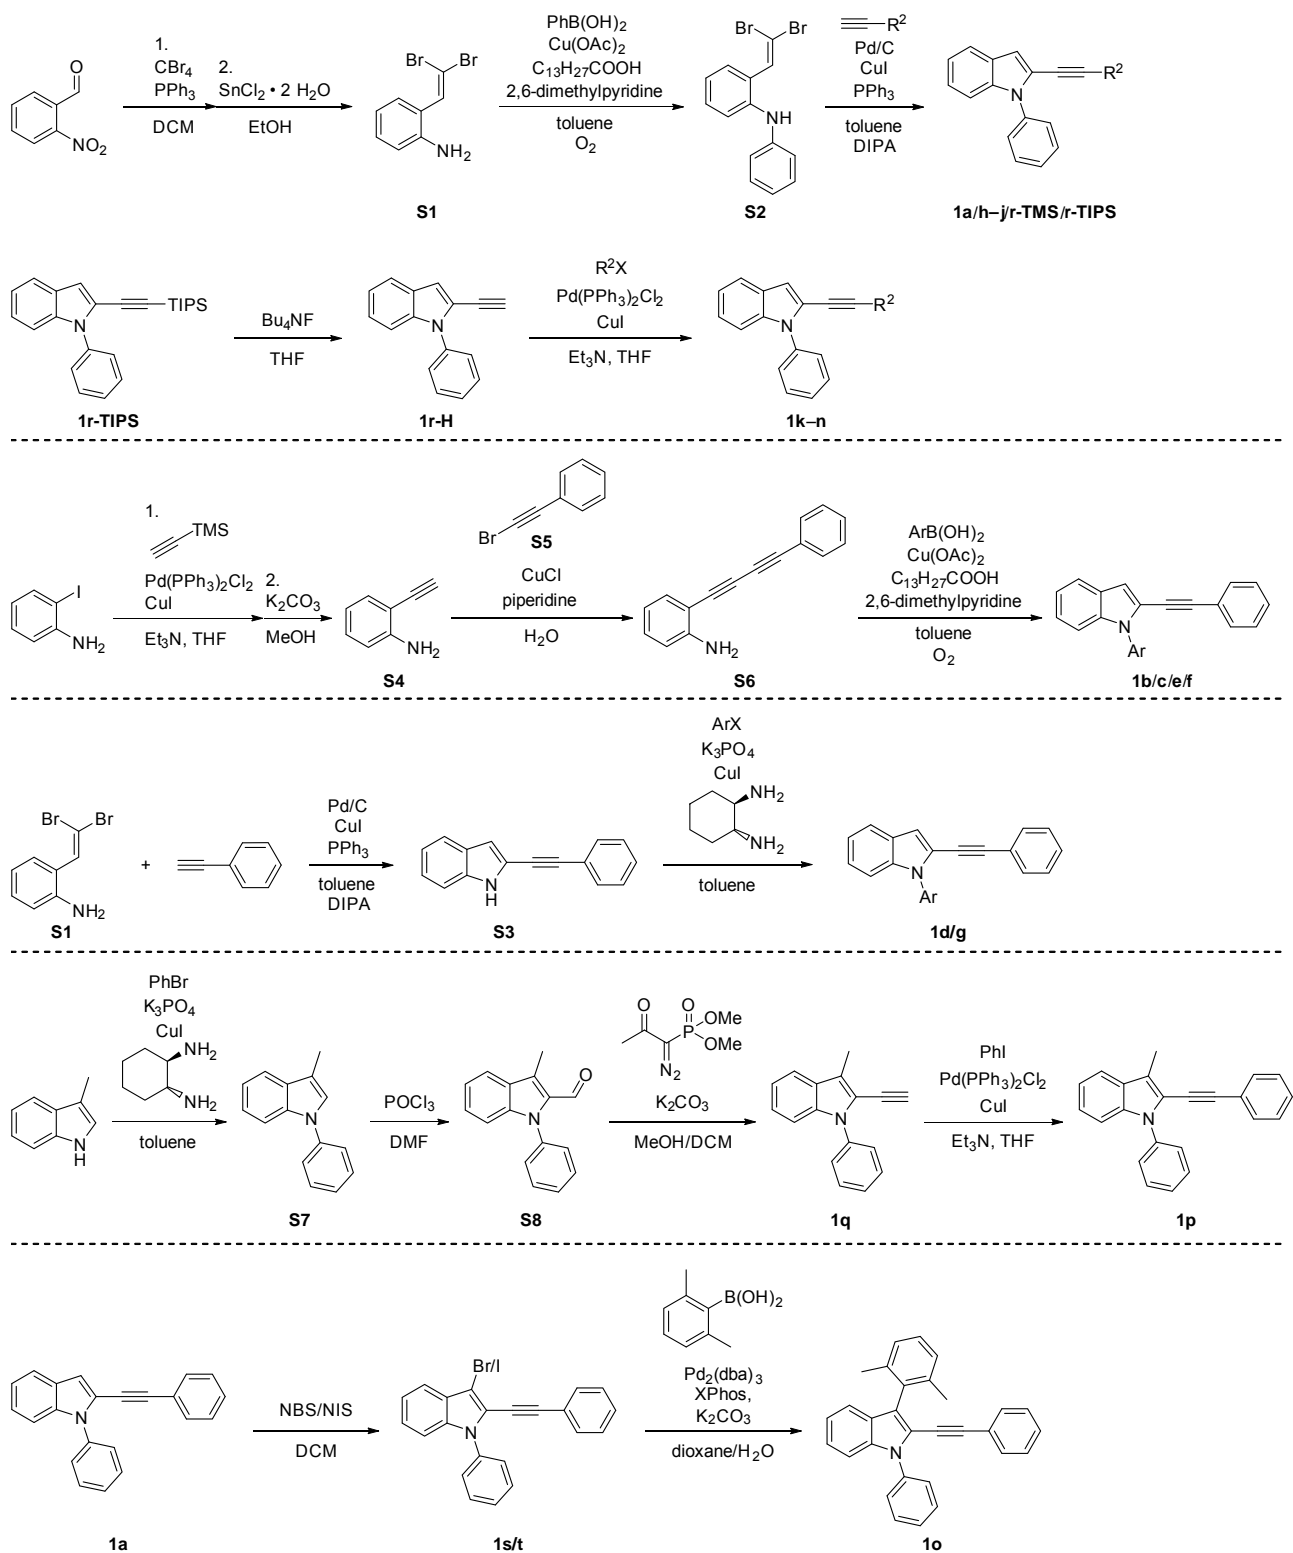



## 1.4 General Procedures

### GP1: Chan-Lam cross coupling

According to a modified procedure by Lautens *et al.*,<sup>[4]</sup> the amine, the corresponding arylboronic acid, copper(II) acetate, 2,6-dimethylpyridine and myristic acid were added to toluene in a round bottom flask and the resulting mixture was stirred under oxygen (balloon) at the given temperature for the given time until TLC showed full conversion. The mixture was poured into water and extracted with ethyl acetate. The combined organic layers were washed with water and brine, dried over Na<sub>2</sub>SO<sub>4</sub> and the solvent was removed under reduced pressure. To remove the occurring by-product (myristic acid aryl ester), which can be difficult to remove by chromatographic methods, an excess of KOH in H<sub>2</sub>O/THF/MeOH (1:1:1) was added to the residue and the resulting mixture was stirred at rt for 16 h. The mixture was extracted with ethyl acetate. The combined organic layers were washed with water and brine, dried over Na<sub>2</sub>SO<sub>4</sub> and the solvent was removed under reduced pressure. The residue was purified by flash column chromatography.

### GP2: Alkynyl indole synthesis

According to a slightly modified procedure by Lautens *et al.*,<sup>[5]</sup> a Schlenk flask containing the 2-(2,2-dibromovinyl)aniline derivative, CuI and PPh<sub>3</sub> was evacuated and refilled with inert gas three times. Then, degassed toluene, the alkyne compound, *i*Pr<sub>2</sub>NH and 5% Pd/C were added and the resulting mixture was stirred at 110 °C for 16 h. The mixture was filtered through a plug of Celite® and the solvent was removed under reduced pressure. The residue was purified by flash column chromatography.

### GP3: Ullmann-type cross coupling

According to a procedure by Promarak *et al.*,<sup>[6]</sup> a Schlenk flask containing the indole derivative, CuI and K<sub>3</sub>PO<sub>4</sub> was evacuated and refilled with inert gas three times. Degassed toluene, the aryl halide and (±)-*trans*-1,2-diaminocyclohexane were added and the mixture was stirred at 110 °C for 16 h. The mixture was filtered through a plug of Celite® and the solvent was removed under reduced pressure. The residue was purified by flash column chromatography.

### GP4: Sonogashira cross coupling

A Schlenk flask containing the palladium precatalyst was evacuated and refilled with inert gas three times. Degassed solvent, the aryl halide and the corresponding alkyne were added. After stirring at rt for 5 min, CuI was added and the mixture was stirred at rt for 16 h (if not stated otherwise). The solvents were removed under reduced pressure and the residue was purified by flash column chromatography.

#### **GP5: Gold catalyzed hydroarylation**

A Schlenk flask containing the substrate and JohnPhosAu(MeCN)SbF<sub>6</sub> was evacuated and refilled with inert gas three times. Degassed *o*-dichlorobenzene was added and the resulting solution was stirred at 170 °C for 4 h. The solvent was removed under reduced pressure and the residue was purified by flash column chromatography.

## 1.5 Synthesis of Compounds

### 2-(2,2-Dibromovinyl)aniline (S1)

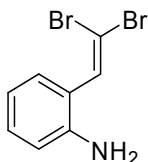

According to a slightly modified procedure by Lautens *et al.*,<sup>[4]</sup> a solution of PPh<sub>3</sub> (23.6 g, 90.0 mmol) in DCM (100 mL) was added dropwise to a solution of 2-nitrobenzaldehyde (4.54 g, 30.0 mmol) and CBr<sub>4</sub> (14.9 g, 44.9 mmol) in DCM (150 mL) at 0–5 °C. The internal temperature was kept at 5 °C while the mixture was stirred for 30 min, then left to warm to rt and stirred for another hour. The mixture was filtered through a plug of silica gel (eluted with DCM) and the solvent was removed under reduced pressure. The residue was dissolved in ethanol (100 mL), SnCl<sub>2</sub>·2H<sub>2</sub>O (27.1 g, 120 mmol) was added and the resulting mixture was stirred at 80 °C for 45 min. The solvent was removed under reduced pressure and water (120 mL) was added. The mixture was brought to pH 9 with K<sub>2</sub>CO<sub>3</sub> and extracted with ethyl acetate. The combined organic layers were washed with water and brine, dried over Na<sub>2</sub>SO<sub>4</sub> and K<sub>2</sub>CO<sub>3</sub> and the solvent was removed under reduced pressure. The residue was dissolved in diethyl ether and filtered through a plug of Celite®. The solvent was removed under reduced pressure and the residue was purified by flash column chromatography (silica gel, PE:EA = 20:1 to 10:1). The product was obtained as a pale yellow solid (6.34 g, 22.9 mmol, 76% over 2 steps).

**R<sub>f</sub>**: 0.20 (silica gel, PE:EA = 10:1); **<sup>1</sup>H NMR** (301 MHz, CDCl<sub>3</sub>): δ = 7.34 (s, 1H), 7.32–7.29 (m, 1H), 7.19–7.14 (m, 1H), 6.79 (td, *J* = 7.5 Hz, *J* = 0.9 Hz, 1H), 6.71 (dd, *J* = 8.1 Hz, *J* = 0.9 Hz, 1H), 3.70 (bs, 2H).

The spectroscopic data correspond to those previously reported in the literature.<sup>[4]</sup>

### 2-(2,2-Dibromovinyl)-*N*-phenylaniline (S2)

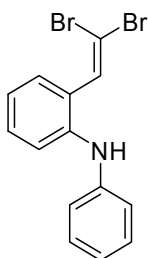

**S1** (2.48 g, 8.95 mmol), phenylboronic acid (2.18 g, 17.9 mmol), copper(II) acetate (1.63 g, 8.95 mmol), 2,6-dimethylpyridine (1.06 g, 9.85 mmol) and myristic acid (818 mg, 3.58 mmol) in toluene (30 mL) were stirred under oxygen at rt for 1 d and treated according to GP1 (silica gel, PE:EA:Et<sub>3</sub>N = 100:1:1). After further purification by recrystallization from DCM/pentane, the product was obtained as an off-white solid (2.41 g, 6.83 mmol, 76%).

**R<sub>f</sub>**: 0.41 (silica gel, PE:EA = 10:1); **<sup>1</sup>H NMR** (301 MHz, CDCl<sub>3</sub>): δ = 7.51–7.48 (m, 1H), 7.40 (s, 1H), 7.31–7.22 (m, 4H), 7.00–6.94 (m, 4H), 5.48 (bs, 1H).

The spectroscopic data correspond to those previously reported in the literature.<sup>[4]</sup>

### 2-(Phenylethynyl)-1H-indole (S3)

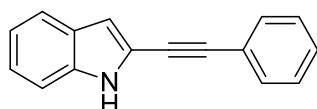

**S1** (1.18 g, 4.26 mmol), CuI (40.6 mg, 213 μmol), PPh<sub>3</sub> (123 mg, 467 μmol), phenylacetylene (653 mg, 702 μmol), *i*Pr<sub>2</sub>NH (1.08 g, 10.7 mmol) and 5% Pd/C (227 mg, 107 μmol) in toluene (15 mL) were used and treated according to GP2 (silica gel, PE:EA = 50:1 to 10:1). The product was obtained as a pale yellow solid (585 mg, 2.69 mmol, 63%).

**R<sub>f</sub>**: 0.45 (silica gel, PE:EA = 10:1); **<sup>1</sup>H NMR** (301 MHz, CDCl<sub>3</sub>): δ = 8.24 (bs, 1H), 7.61 (d, *J* = 7.7 Hz, 1H), 7.56–7.53 (m, 2H), 7.39–7.33 (m, 4H), 7.26–7.24 (m, 1H), 7.16–7.11 (m, 1H), 6.84–6.83 (m, 1H).

The spectroscopic data correspond to those previously reported in the literature.<sup>[5]</sup>

### 2-Ethynylaniline (S4)

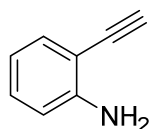

A Schlenk flask containing 2-iodoaniline (8.00 g, 35.5 mmol) and Pd(PPh<sub>3</sub>)<sub>2</sub>Cl<sub>2</sub> (256 mg, 365 μmol) was evacuated and refilled with nitrogen three times. Degassed Et<sub>3</sub>N (150 mL) and ethynyltrimethylsilane (4.48 g, 45.7 mmol) were added and the mixture was stirred at rt for 5 min. CuI (139 mg, 731 μmol) was added and the mixture was stirred at rt for 2 h. The mixture was filtered through a plug of Celite® (eluted with EA), the solvents were removed under reduced pressure and the residue was dissolved in methanol (150 mL). K<sub>2</sub>CO<sub>3</sub> (10.1 g, 73.1 mmol) was added and the resulting mixture was stirred at rt for 30 min. The solvent was removed under reduced pressure and the residue was purified by flash column chromatography (silica gel, PE:EA = 20:1 to 5:1). The product was obtained as a pale yellow oil (3.06 g, 26.1 mmol, 72%).

**R<sub>f</sub>**: 0.24 (silica gel, PE:EA = 10:1); **<sup>1</sup>H NMR** (301 MHz, CDCl<sub>3</sub>): δ = 7.32 (dd, *J* = 7.7 Hz, *J* = 1.2 Hz, 1H), 7.17–7.12 (m, 1H), 6.71–6.65 (m, 2H), 4.24 (bs, 2H), 3.38 (s, 1H).

The spectroscopic data correspond to those previously reported in the literature.<sup>[7]</sup>

### (Bromoethynyl)benzene (**S5**)

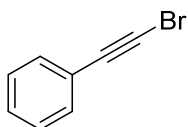

According to a slightly modified procedure by Wulff *et al.*,<sup>[8]</sup> to a solution of phenylacetylene (3.50 g, 34.3 mmol) in acetone (150 mL) was added NBS (6.71 g, 37.7 mmol) and AgNO<sub>3</sub> (291 mg, 1.71 mmol) and the mixture was stirred at rt for 16 h. The solvent was removed under reduced pressure. PE was added and the mixture was filtered through a plug of silica and the solvent was removed under reduced pressure. The product was obtained as a brown oil (4.87 g, 26.9 mmol, 79%).

**R<sub>f</sub>**: 0.80 (silica gel, PE); **<sup>1</sup>H NMR** (301 MHz, CDCl<sub>3</sub>): δ = 7.48–7.43 (m, 2H), 7.37–7.28 (m, 3H).

The spectroscopic data correspond to those previously reported in the literature.<sup>[8]</sup>

### 2-(Phenylbuta-1,3-diyne-1-yl)aniline (**S6**)

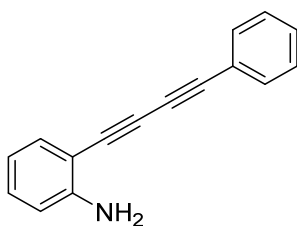

According to a procedure by Chinta and Baire,<sup>[9]</sup> under a nitrogen atmosphere **S4** (1.10 g, 9.39 mmol) and **S5** (1.87 g, 10.3 mmol) were dissolved in degassed water (110 mL) and piperidine (4.00 g, 47.0 mmol). CuCl (139 mg, 1.41 mmol) was added and the resulting mixture was stirred at rt for 16 h. A saturated aqueous solution of NH<sub>4</sub>Cl (25 mL) was added and the mixture was extracted with ethyl acetate. The combined organic layers were washed with water and brine, dried over Na<sub>2</sub>SO<sub>4</sub> and the solvent was removed under reduced pressure. The residue was purified by flash column chromatography (silica gel, PE:EA:Et<sub>3</sub>N = 100:5:1 to 100:20:1). The product was obtained as an orange-brown solid (1.90 g, 8.74 mmol, 93%).

**R<sub>f</sub>**: 0.26 (silica gel, PE:EA = 10:1); **<sup>1</sup>H NMR** (301 MHz, CDCl<sub>3</sub>): δ = 7.55–7.51 (m, 2H), 7.40–7.30 (m, 4H), 7.19–7.13 (m, 1H), 6.71–6.66 (m, 2H), 4.32 (bs, 2H).

The spectroscopic data correspond to those previously reported in the literature.<sup>[10]</sup>

### 3-Methyl-1-phenyl-1*H*-indole (**S7**)

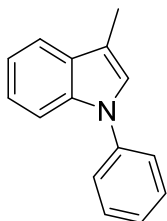

3-Methyl-1*H*-indole (1.50 g, 11.4 mmol), bromobenzene (2.69 g, 17.2 mmol), K<sub>3</sub>PO<sub>4</sub> (5.10 g, 24.0 mmol), (±)-*trans*-1,2-diaminocyclohexane (326 mg, 2.86 mmol) and CuI (544 mg, 2.86 mmol) in toluene (30 mL) were used and treated according to GP3 (silica gel, PE:EA = 100:1). The product was obtained as a colorless oil (2.26 g, 10.9 mmol, 95%).

**R<sub>f</sub>**: 0.73 (silica gel, PE:EA = 10:1); **<sup>1</sup>H NMR** (301 MHz, CDCl<sub>3</sub>): δ = 7.66–7.63 (m, 1H), 7.59–7.56 (m, 1H), 7.54–7.48 (m, 4H), 7.37–7.30 (m, 1H), 7.27–7.17 (m, 2H), 7.16 (d, *J* = 1.0 Hz, 1H), 2.41 (d, *J* = 1.1 Hz, 3H).

The spectroscopic data correspond to those previously reported in the literature.<sup>[11]</sup>

### 3-Methyl-1-phenyl-1*H*-indole-2-carbaldehyde (**S8**)

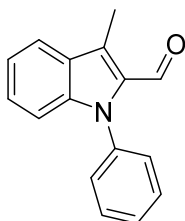

According to a procedure by Reddy *et al.*,<sup>[12]</sup> to a stirred solution of **S7** (742 mg, 3.58 mmol) in DMF (20 mL) at 0 °C phosphoryl chloride (8.23 g, 53.7 mmol) was added and the mixture was stirred at 70 °C for 5 h. Water was added at 0 °C and the mixture was neutralized with 1 M aqueous KOH. The resulting precipitate was filtered off, washed with water and dried under reduced pressure. The crude product was purified by flash column chromatography (silica gel, PE:EA = 50:1). The product was obtained as a colorless solid (805 mg, 3.42 mmol, 96%).

**Mp**: 80 °C; **R<sub>f</sub>**: 0.23 (silica gel, PE:EA = 20:1); **<sup>1</sup>H NMR** (500 MHz, CDCl<sub>3</sub>): δ = 10.01 (s, 1H), 7.78 (d, *J* = 8.1 Hz, 1H), 7.56–7.53 (m, 2H), 7.50–7.46 (m, 1H), 7.39–7.34 (m, 3H), 7.24–7.21 (m, 1H), 7.18 (d, *J* = 8.5 Hz, 1H), 2.75 (s, 3H); **<sup>13</sup>C{<sup>1</sup>H} NMR** (126 MHz, CDCl<sub>3</sub>): 182.3 (d, 1C), 139.9 (s, 1C), 137.4 (s, 1C), 132.1 (s, 1C), 129.5 (d, 2C), 128.3 (d, 1C), 128.1 (d, 2C), 127.5 (s, 1C), 127.5 (d, 1C), 125.3 (s, 1C), 121.4 (d, 1C), 121.1 (d, 1C), 111.5 (d, 1C), 9.5 (q, 1C); **HR-MS** (EI<sup>+</sup>): *m/z* calculated for [C<sub>16</sub>H<sub>13</sub>N]<sup>+</sup>, [M]<sup>+</sup>: 235.09917, found: 235.09932; **IR** (ATR): ν [cm<sup>-1</sup>] = 3058, 2956, 2925, 2854, 1723, 1673, 1613, 1597, 1536, 1499, 1454, 1381, 1344, 1282, 1227, 1137, 1113, 1073, 948, 882, 747, 721, 699, 641.

### 1-Phenyl-2-(phenylethynyl)-1*H*-indole (1a)

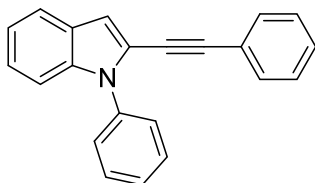

**S2** (2.77 g, 7.85 mmol), CuI (74.7 mg, 392  $\mu$ mol), PPh<sub>3</sub> (113 mg, 432  $\mu$ mol), phenylacetylene (1.20 g, 11.8 mmol), *i*Pr<sub>2</sub>NH (1.98 g, 19.6 mmol) and 5% Pd/C (417mg, 196  $\mu$ mol) in toluene (35 mL) were used and treated according to GP2 (silica gel, PE:DCM = 100:1). The product was obtained as a colorless solid (1.55 g, 5.28 mmol, 67%).

**R<sub>f</sub>**: 0.58 (silica gel, PE:EA = 20:1); **<sup>1</sup>H NMR** (301 MHz, CDCl<sub>3</sub>):  $\delta$  = 7.68–7.64 (m, 1H), 7.60–7.53 (m, 4H), 7.50–7.43 (m, 1H), 7.34–7.27 (m, 6H), 7.26–7.15 (m, 2H), 7.00 (d, *J* = 0.7 Hz, 1H).

The spectroscopic data correspond to those previously reported in the literature.<sup>[13]</sup>

### 1-(4-Methoxyphenyl)-2-(phenylethynyl)-1*H*-indole (1b)

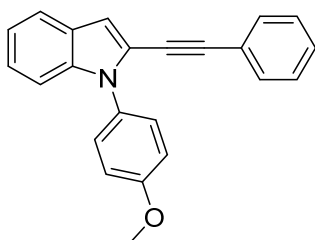

**S6** (200 mg, 921  $\mu$ mol), (4-methoxyphenyl)boronic acid (280 mg, 1.84 mmol), copper(II) acetate (167 mg, 921  $\mu$ mol), 2,6-dimethylpyridine (108 mg, 1.01 mmol) and myristic acid (84.1 mg, 368  $\mu$ mol) in toluene (25 mL) were stirred under oxygen at 80 °C for 3 d and treated according to GP1. The crude product was a mixture of non-cyclized secondary amine and cyclized indole. To force cyclization IPrAuNTf<sub>2</sub> (7.97 mg, 9.21  $\mu$ mol) in DCE (10 mL) was added and the mixture was stirred at 80 °C for 5 h. The solvent was removed under reduced pressure and the residue was purified by flash column chromatography (silica gel, PE:EA = 50:1). The product was obtained as a pale yellow solid (101 mg, 313  $\mu$ mol, 34%).

**R<sub>f</sub>**: 0.23 (silica gel, PE:EA = 50:1); **<sup>1</sup>H NMR** (301 MHz, CDCl<sub>3</sub>):  $\delta$  = 7.66–7.64 (m, 1H), 7.50–7.45 (m, 2H), 7.35–7.27 (m, 5H), 7.25–7.13 (m, 3H), 7.10–7.04 (m, 2H), 6.98 (d, *J* = 0.4 Hz, 1H), 3.91 (s, 3H).

The spectroscopic data correspond to those previously reported in the literature.<sup>[13]</sup>

### 2-(Phenylethynyl)-1-(3,4,5-trimethoxyphenyl)-1H-indole (1c)

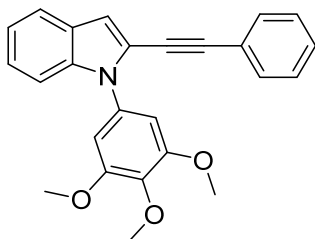

**S6** (200 mg, 921  $\mu\text{mol}$ ), (3,4,5-trimethoxyphenyl)boronic acid (390 mg, 1.84 mmol), copper(II) acetate (167 mg, 921  $\mu\text{mol}$ ), 2,6-dimethylpyridine (108 mg, 1.01 mmol) and myristic acid (84.1 mg, 368  $\mu\text{mol}$ ) in toluene (25 mL) were stirred under oxygen at 60 °C for 2 d and treated according to GP1 (silica gel, PE:EA = 30:1 to 15:1). The product was obtained as a pale yellow solid (122 mg, 317  $\mu\text{mol}$ , 34%).

**Mp:** 117 °C; **R<sub>f</sub>:** 0.37 (silica gel, PE:EA = 5:1); **<sup>1</sup>H NMR** (600 MHz, CD<sub>2</sub>Cl<sub>2</sub>):  $\delta$  = 7.65 (d,  $J$  = 7.9 Hz, 1H), 7.38–7.32 (m, 6H), 7.26–7.23 (m, 1H), 7.18–7.15 (m, 1H), 7.00 (d,  $J$  = 0.7 Hz, 1H), 6.81 (s, 2H), 3.88 (s, 3H), 3.84 (s, 6H); **<sup>13</sup>C{<sup>1</sup>H} NMR** (151 MHz, CD<sub>2</sub>Cl<sub>2</sub>): 153.9 (s, 2C), 138.0 (s, 1C), 137.8 (s, 1C), 133.5 (s, 1C), 131.4 (d, 2C), 129.0 (d, 1C), 128.9 (d, 2C), 127.9 (s, 1C), 124.1 (d, 1C), 122.9 (s, 1C), 122.3 (s, 1C), 121.3 (d, 1C), 121.3 (d, 1C), 111.0 (d, 1C), 109.6 (d, 1C), 105.1 (d, 2C), 95.7 (s, 1C), 82.0 (s, 1C), 61.0 (q, 1C), 56.6 (q, 2C); **HR-MS** (EI<sup>+</sup>):  $m/z$  calculated for [C<sub>25</sub>H<sub>21</sub>NO<sub>3</sub>]<sup>+</sup>, [M]<sup>+</sup>: 383.15159, found: 383.15098; **IR** (ATR):  $\nu$  [cm<sup>-1</sup>] = 3060, 2938, 2832, 2212, 1596, 1505, 1475, 1455, 1419, 1354, 1331, 1305, 1231, 1182, 1129, 1067, 1008, 950, 853, 828, 794, 756, 692, 658, 632.

### 2-(Phenylethynyl)-1-(4-(trifluoromethyl)phenyl)-1H-indole (1d)

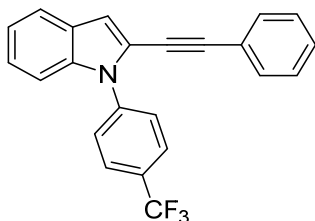

**S3** (50.8 mg, 234  $\mu\text{mol}$ ), 1-bromo-4-(trifluoromethyl)benzene (131 mg, 584  $\mu\text{mol}$ ), K<sub>3</sub>PO<sub>4</sub> (149 mg, 701  $\mu\text{mol}$ ), (±)-*trans*-1,2-diaminocyclohexane (13.3 mg, 117  $\mu\text{mol}$ ) and CuI (22.2 mg, 117  $\mu\text{mol}$ ) in toluene (6 mL) were used and treated according to GP3 (silica gel, PE). The product was obtained as a pale yellow solid (60.8 mg, 168  $\mu\text{mol}$ , 72%).

**Mp:** 97 °C; **R<sub>f</sub>:** 0.7 (silica gel, PE:EA = 20:1); **<sup>1</sup>H NMR** (500 MHz, CD<sub>2</sub>Cl<sub>2</sub>):  $\delta$  = 7.87 (d,  $J$  = 8.4 Hz, 2H), 7.77 (d,  $J$  = 8.4 Hz, 2H), 7.67 (d,  $J$  = 7.9 Hz, 1H), 7.37–7.32 (m, 6H), 7.28 (td,  $J$  = 7.6 Hz,  $J$  = 1.0 Hz, 1H), 7.21 (t,  $J$  = 7.4 Hz, 1H), 7.07 (s, 1H); **<sup>13</sup>C{<sup>1</sup>H, <sup>19</sup>F} NMR** (126 MHz, CD<sub>2</sub>Cl<sub>2</sub>): 141.2 (s, 1C), 137.6 (s, 1C), 131.5 (d, 2C), 129.5 (s, 1C), 129.2 (d, 1C), 128.9 (d, 2C), 128.3 (s, 1C), 127.8 (d, 2C), 126.7 (d, 2C), 124.6 (d, 1C), 124.5 (s, 1C), 122.7 (s, 1C), 121.9 (s, 1C), 121.9 (d, 1C), 121.5 (d, 1C), 110.8 (d, 1C), 110.7 (d, 1C), 96.1 (s, 1C), 81.4 (s, 1C); **<sup>19</sup>F{<sup>1</sup>H} NMR** (471 MHz, CD<sub>2</sub>Cl<sub>2</sub>): -62.6 (3F); **HR-MS** (EI<sup>+</sup>):  $m/z$  calculated for [C<sub>23</sub>H<sub>14</sub>F<sub>3</sub>N]<sup>+</sup>, [M]<sup>+</sup>: 361.10729, found: 361.10829; **IR** (ATR):  $\nu$  [cm<sup>-1</sup>] = 3068, 2927, 2215, 1618, 1523, 1489, 1477, 1454, 1418, 1383, 1327, 1218, 1166, 1119, 1069, 1020, 931, 842, 811, 796, 757, 739, 710, 690, 638, 623, 606.



### 1-(4-Bromophenyl)-2-(phenylethynyl)-1H-indole (1e)

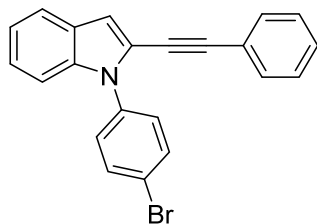

**S6** (200 mg, 921  $\mu\text{mol}$ ), (4-bromophenyl)boronic acid (370 mg, 1.84 mmol), copper(II) acetate (167 mg, 921  $\mu\text{mol}$ ), 2,6-dimethylpyridine (108 mg, 1.01 mmol) and myristic acid (84.1 mg, 368  $\mu\text{mol}$ ) in toluene (25 mL) were stirred under oxygen at 80 °C for 3 d and treated according to GP1. The crude product was a mixture of non-cyclized secondary amine and cyclized indole. To force cyclization IPrAuNTf<sub>2</sub> (7.97 mg, 9.21  $\mu\text{mol}$ ) in DCE (10 mL) was added and the mixture was stirred at 80 °C for 5 h. The solvent was removed under reduced pressure and the residue was purified by flash column chromatography (silica gel, PE:EA = 100:1). The product was obtained as a pale yellow solid (168 mg, 450  $\mu\text{mol}$ , 49%).

**Mp**: 138 °C; **R<sub>f</sub>**: 0.33 (silica gel, PE:EA = 50:1); **<sup>1</sup>H NMR** (600 MHz, CD<sub>2</sub>Cl<sub>2</sub>):  $\delta$  = 7.73–7.71 (m, 2H), 7.66–7.65 (m, 1H), 7.51–7.49 (m, 2H), 7.38–7.33 (m, 5H), 7.31 (d,  $J$  = 8.3 Hz, 1H), 7.25 (td,  $J$  = 7.6 Hz,  $J$  = 1.1 Hz, 1H), 7.18 (td,  $J$  = 7.4 Hz,  $J$  = 0.9 Hz, 1H), 7.03 (s, 1H); **<sup>13</sup>C{<sup>1</sup>H} NMR** (151 MHz, CD<sub>2</sub>Cl<sub>2</sub>): 137.7 (s, 1C), 137.1 (s, 1C), 132.7 (d, 2C), 131.5 (d, 2C), 129.2 (d, 2C), 129.1 (d, 1C), 128.9 (d, 2C), 128.1 (s, 1C), 124.3 (d, 1C), 122.8 (s, 1C), 122.0 (s, 1C), 121.6 (d, 1C), 121.5 (s, 1C), 121.4 (d, 1C), 110.7 (d, 1C), 110.2 (d, 1C), 95.8 (s, 1C), 81.5 (s, 1C); **HR-MS** (EI<sup>+</sup>):  $m/z$  calculated for [C<sub>22</sub>H<sub>14</sub><sup>79</sup>BrN]<sup>+</sup>, [M]<sup>+</sup>: 371.03041, found: 371.03231; **IR** (ATR):  $\nu$  [cm<sup>-1</sup>] = 3050, 1947, 1900, 1643, 1586, 1571, 1489, 1448, 1402, 1378, 1351, 1317, 1262, 1215, 1176, 1150, 1123, 1102, 1072, 1012, 935, 915, 847, 824, 806, 742, 709, 686, 651, 633, 620.

### 1-(4-Nitrophenyl)-2-(phenylethynyl)-1H-indole (1f)

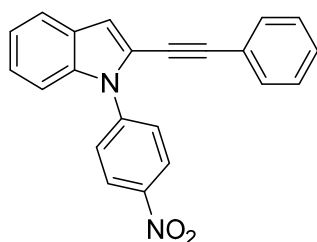

**S6** (250 mg, 1.15 mmol), (4-nitrophenyl)boronic acid (384 mg, 2.30 mmol), copper(II) acetate (209 mg, 1.15 mmol), 2,6-dimethylpyridine (137 mg, 1.28 mmol) and myristic acid (105 mg, 460  $\mu\text{mol}$ ) in toluene (50 mL) were stirred under oxygen at 80 °C for 3 d and treated according to GP1. The crude product was a mixture of non-cyclized secondary amine and cyclized indole. To force cyclization IPrAuNTf<sub>2</sub> (7.97 mg, 9.21  $\mu\text{mol}$ ) in DCE (10 mL) was added and the mixture was stirred at 80 °C for 5 h. The solvent was removed under reduced pressure and the residue was purified by flash column chromatography (silica gel, PE:EA = 100:1 to 20:1). The product was obtained as a pale yellow solid (93.0 mg, 275  $\mu\text{mol}$ , 24%).

**Mp:** 125 °C; **R<sub>f</sub>:** 0.6 (silica gel, PE:EA = 10:1); **<sup>1</sup>H NMR** (301 MHz, CDCl<sub>3</sub>): δ = 8.47–8.42 (m, 2H), 7.85–7.80 (m, 2H), 7.69–7.67 (m, 1H), 7.40–7.27 (m, 7H), 7.26–7.21 (m, 1H), 7.08 (d, *J* = 0.5 Hz, 1H); **<sup>13</sup>C{<sup>1</sup>H} NMR** (101 MHz, CDCl<sub>3</sub>): 146.3 (s, 1C), 143.5 (s, 1C), 137.0 (s, 1C), 131.3 (d, 2C), 129.0 (d, 1C), 128.7 (d, 2C), 128.3 (s, 1C), 127.4 (d, 2C), 124.8 (d, 2C), 124.7 (d, 1C), 122.3 (s, 1C), 122.1 (d, 1C), 121.6 (d, 1C), 121.6 (s, 1C), 111.7 (d, 1C), 110.4 (d, 1C), 96.4 (s, 1C), 80.9 (s, 1C); **HR-MS** (EI+): *m/z* calculated for [C<sub>22</sub>H<sub>14</sub>N<sub>2</sub>O<sub>2</sub>]<sup>+</sup>, [M]<sup>+</sup>: 338.10498, found: 338.10503; **IR** (ATR): ν [cm<sup>-1</sup>] = 3079, 2922, 2850, 1605, 1591, 1522, 1497, 1450, 1376, 1341, 1312, 1213, 1153, 1105, 1069, 1018, 934, 913, 849, 807, 750, 695, 684, 637.

### 2-(Phenylethynyl)-1-(thiophen-2-yl)-1*H*-indole (1g)

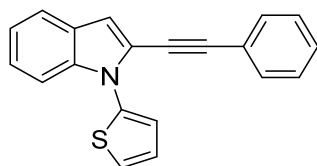

**S3** (173 mg, 795 μmol), 2-iodothiophene (251 mg, 1.19 mmol), K<sub>3</sub>PO<sub>4</sub> (355 mg, 1.67 mmol), (±)-*trans*-1,2-diaminocyclohexane (22.7 mg, 199 μmol) and CuI (37.9 mg, 199 μmol) in toluene (6 mL) were used and treated according to GP3 (silica gel, PE:EA = 100:1 to 50:1). The product was obtained as a pale yellow oil (192 mg, 641 μmol, 81%).

**R<sub>f</sub>:** 0.45 (silica gel, PE:EA = 20:1); **<sup>1</sup>H NMR** (500 MHz, CDCl<sub>3</sub>): δ = 7.64 (d, *J* = 7.9 Hz, 1H), 7.40–7.35 (m, 4H), 7.33–7.25 (m, 4H), 7.21–7.19 (m, 2H), 7.13 (dd, *J* = 5.6 Hz, *J* = 3.7 Hz, 1H), 6.99 (s, 1H); **<sup>13</sup>C{<sup>1</sup>H} NMR** (126 MHz, CDCl<sub>3</sub>): 139.0 (s, 1C), 138.8 (s, 1C), 131.4 (d, 2C), 128.7 (d, 1C), 128.5 (d, 2C), 127.7 (s, 1C), 125.7 (d, 1C), 125.1 (d, 1C), 124.2 (d, 1C), 124.2 (d, 1C), 123.5 (s, 1C), 122.7 (s, 1C), 121.5 (d, 1C), 121.1 (d, 1C), 110.9 (d, 1C), 109.9 (d, 1C), 96.0 (s, 1C), 81.2 (s, 1C); **HR-MS** (EI+): *m/z* calculated for [C<sub>20</sub>H<sub>13</sub>NS]<sup>+</sup>, [M]<sup>+</sup>: 299.07632, found: 299.07565; **IR** (ATR): ν [cm<sup>-1</sup>] = 3058, 2209, 1597, 1548, 1487, 1474, 1452, 1377, 1338, 1312, 1226, 1210, 1185, 1147, 1123, 1069, 1014, 915, 845, 797, 754, 692, 636.

### 2-(Hex-1-yn-1-yl)-1-phenyl-1*H*-indole (1h)

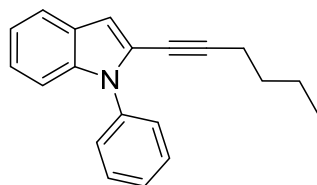

**S2** (250 mg, 708 μmol), CuI (6.74 mg, 35.4 μmol), PPh<sub>3</sub> (20.4 mg, 77.9 μmol), hex-1-yne (87.3 mg, 1.06 mmol), *i*Pr<sub>2</sub>NH (179 mg, 1.77 mmol) and 5% Pd/C (75.4 mg, 35.4 μmol) in toluene (5 mL) were used and treated according to GP2 (silica gel, PE:DCM = 100:1). The product was obtained as an off-white solid (122 mg, 446 μmol, 63%).

**Mp:** 54 °C; **R<sub>f</sub>:** 0.26 (silica gel, PE:EA = 50:1); **<sup>1</sup>H NMR** (400 MHz, CD<sub>2</sub>Cl<sub>2</sub>): δ = 7.61–7.58 (m, 1H), 7.56–7.49 (m, 4H), 7.46–7.42 (m, 1H), 7.26–7.24 (m, 1H), 7.20–7.16 (m, 1H), 7.15–7.11 (m, 1H), 6.81 (s, 1H), 2.35 (t, *J* = 7.0 Hz, 2H), 1.46 (quint, *J* = 7.2 Hz, 2H), 1.31 (sext, *J* = 7.4 Hz, 2H), 0.87 (t, *J* = 7.3 Hz, 3H); **<sup>13</sup>C NMR** (101 MHz, CD<sub>2</sub>Cl<sub>2</sub>): δ = 138.2 (s, 1C), 137.6 (s, 1C), 129.4 (d, 2C), 128.0 (s, 1C), 127.8 (d, 1C), 127.7 (d, 2C), 123.5 (d, 1C), 123.2 (s, 1C), 121.1 (d, 1C), 121.0 (d, 1C), 110.7 (d, 1C), 108.4 (d, 1C), 97.2 (s, 1C), 72.9 (s, 1C), 30.8 (t, 1C), 22.2 (t, 1C), 19.5 (t, 1C), 13.7 (q, 1C); **HR-MS** (DART+): *m/z* calculated for [C<sub>20</sub>H<sub>20</sub>N]<sup>+</sup>, [M+H]<sup>+</sup>: 274.1590, found: 274.1590; **IR** (ATR): ν [cm<sup>-1</sup>] = 3060, 2956, 2930, 2870, 2234, 1597, 1532, 1501, 1452, 1378, 1361, 1331, 1316, 1241, 1202, 1145, 1076, 1026, 1012, 929, 789, 759, 748, 738, 698, 645, 633, 609.

### 2-((4-Methoxyphenyl)ethynyl)-1-phenyl-1*H*-indole (1i)

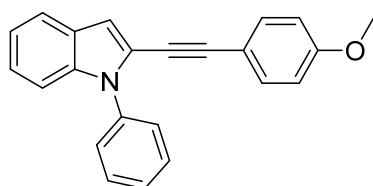

**S2** (213 mg, 602 μmol), CuI (5.73 mg, 30.1 μmol), PPh<sub>3</sub> (17.4 mg, 66.2 μmol), 1-ethynyl-4-methoxybenzene (127 mg, 963 μmol), *i*Pr<sub>2</sub>NH (152 mg, 1.50 mmol) and 5% Pd/C (25.6 mg, 12.0 μmol) in toluene (10 mL) were used and treated according to GP2 (silica gel, PE:EA = 40:1 to 10:1). After further purification by recrystallization from DCM/pentane, the product was obtained as a pale yellow solid (68.2 mg, 211 μmol, 35%).

**R<sub>f</sub>:** 0.50 (silica gel, PE:EA = 10:1); **<sup>1</sup>H NMR** (301 MHz, CDCl<sub>3</sub>): δ = 7.66–7.63 (m, 1H), 7.61–7.52 (m, 4H), 7.47–7.42 (m, 1H), 7.31 (d, *J* = 8.4 Hz, 1H), 7.27–7.14 (m, 4H), 6.96 (d, *J* = 0.7 Hz, 1H), 6.82 (d, *J* = 8.9 Hz, 2H) 3.80 (s, 3H).

The spectroscopic data correspond to those previously reported in the literature.<sup>[13]</sup>

### 1-Phenyl-2-((4-(trifluoromethyl)phenyl)ethynyl)-1*H*-indole (1j)

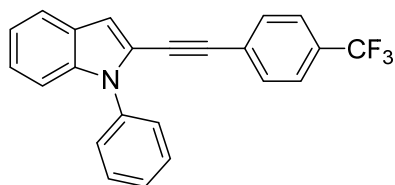

**S2** (213 mg, 602 μmol), CuI (5.73 mg, 30.1 μmol), PPh<sub>3</sub> (17.4 mg, 66.2 μmol), 1-ethynyl-4-(trifluoromethyl)benzene (164 mg, 963 μmol), *i*Pr<sub>2</sub>NH (152 mg, 1.50 mmol) and 5% Pd/C (25.6 mg, 12.0 μmol) in toluene (10 mL) were used and treated according to GP2 (silica gel, PE:EA = 80:1). The product was obtained as a pale yellow solid (150 mg, 415 μmol, 69%).

**R<sub>f</sub>**: 0.78 (silica gel, PE:EA = 10:1); **<sup>1</sup>H NMR** (301 MHz, CDCl<sub>3</sub>): δ = 7.69–7.66 (m, 1H), 7.58–7.53 (m, 6H), 7.51–7.46 (m, 1H), 7.39 (d, *J* = 8.0 Hz, 2H), 7.33 (d, *J* = 8.2 Hz, 1H), 7.28–7.23 (m, 1H), 7.22–7.16 (m, 1H), 7.06 (s, 1H).

The spectroscopic data correspond to those previously reported in the literature.<sup>[13]</sup>

### 1-Phenyl-2-((trimethylsilyl)ethynyl)-1*H*-indole (1r-TMS)

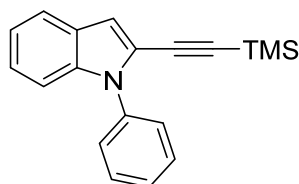

**S2** (3.00 g, 8.50 mmol), CuI (80.9 mg, 425 μmol), PPh<sub>3</sub> (245 mg, 935 μmol), TMS acetylene (1.67 g, 17.0 mmol), *i*Pr<sub>2</sub>NH (2.15 g, 21.2 mmol) and 5% Pd/C (904 mg, 425 μmol) in toluene (30 mL) were used and treated according to GP2 (silica gel, PE:EA = 100:1). The product was obtained as a brown oil (1.81 g, 6.25 mmol, 74%).

**R<sub>f</sub>**: 0.38 (silica gel, PE:EA = 100:1); **<sup>1</sup>H NMR** (400 MHz, CDCl<sub>3</sub>): δ = 7.63 (d, *J* = 7.7 Hz, 1H), 7.54–7.49 (m, 4H), 7.45–7.39 (m, 1H), 7.30–7.28 (m, 1H), 7.23–7.20 (m, 1H), 7.17–7.13 (m, 1H), 6.93 (s, 1H), 0.13 (s, 9H); **<sup>13</sup>C{<sup>1</sup>H} NMR** (101 MHz, CDCl<sub>3</sub>): δ = 137.7 (s, 1C), 137.5 (s, 1C), 129.0 (d, 2C), 127.6 (d, 1C), 127.5 (d, 2C), 127.5 (s, 1C), 123.9 (d, 1C), 122.0 (s, 1C), 121.3 (d, 1C), 121.0 (d, 1C), 110.7 (d, 1C), 109.9 (d, 1C), 101.6 (s, 1C), 96.9 (s, 1C), -0.3 (q, 3C); **HR-MS** (DART+): *m/z* calculated for [C<sub>19</sub>H<sub>20</sub>NSi]<sup>+</sup>, [M+H]<sup>+</sup>: 290.1360, found: 290.1362; **IR** (ATR): ν [cm<sup>-1</sup>] = 3059, 2958, 2897, 2155, 1596, 1523, 1501, 1449, 1377, 1318, 1249, 1205, 1154, 1074, 995, 938, 868, 839, 791, 759, 697.

### 1-Phenyl-2-((triisopropylsilyl)ethynyl)-1*H*-indole (1r-TIPS)

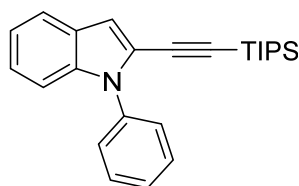

**S2** (1.50 g, 4.25 mmol), CuI (40.5 mg, 212 μmol), PPh<sub>3</sub> (123 mg, 467 μmol), TIPS acetylene (1.55 g, 8.50 mmol), *i*Pr<sub>2</sub>NH (1.07 g, 10.6 mmol) and 5% Pd/C (452 mg, 212 μmol) in toluene (18 mL) were used and treated according to GP2 (silica gel, PE:EA = 200:1). The product was obtained as a pale yellow solid (1.48 g, 3.96 mmol, 93%).

**Mp**: 35 °C; **R<sub>f</sub>**: 0.50 (silica gel, PE:EA = 100:1); **<sup>1</sup>H NMR** (400 MHz, CDCl<sub>3</sub>): δ = 7.63 (d, *J* = 7.7 Hz, 1H), 7.52–7.47 (m, 4H), 7.44–7.38 (m, 1H), 7.26–7.19 (m, 2H), 7.17–7.13 (m, 1H), 6.96 (s, 1H), 1.03–

0.99 (m, 21H);  $^{13}\text{C}\{^1\text{H}\}$  NMR (101 MHz,  $\text{CDCl}_3$ ):  $\delta$  = 137.8 (s, 1C), 137.6 (s, 1C), 129.2 (d, 2C), 127.7 (d, 2C), 127.7 (d, 1C), 127.4 (s, 1C), 123.8 (d, 1C), 122.5 (s, 1C), 121.1 (d, 1C), 121.0 (d, 1C), 110.7 (d, 1C), 109.9 (d, 1C), 98.4 (s, 1C), 98.0 (s, 1C), 18.6 (q, 6C), 11.4 (d, 3C); **HR-MS** (DART+):  $m/z$  calculated for  $[\text{C}_{25}\text{H}_{32}\text{NSi}]^+$ ,  $[\text{M}+\text{H}]^+$ : 374.2299, found: 374.2278; **IR** (ATR):  $\nu$  [ $\text{cm}^{-1}$ ] = 3059, 2942, 2890, 2864, 2724, 2152, 1922, 1887, 1798, 1771, 1665, 1596, 1523, 1501, 1449, 1414, 1378, 1362, 1318, 1286, 1236, 1205, 1155, 1115, 1073, 1033, 1016, 996, 919, 882, 863, 791, 760, 748, 731, 700, 676, 625, 608.

## 2-Ethynyl-1-phenyl-1H-indole (1r-H)

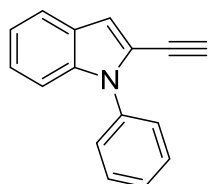

TBAF (1 M in THF, 7.01 mL, 7.01 mmol) was added to a solution of **1r-TIPS** (1.31 g, 3.51 mmol) in THF (50 mL) and the mixture was stirred at rt for 30 min. The solvent was removed under reduced pressure and 30 mL water was added. The mixture was extracted with ethyl acetate and the combined organic layers were washed with water and brine, dried over  $\text{Na}_2\text{SO}_4$  and the solvent was removed under reduced pressure. The residue was purified by flash column chromatography (silica gel, PE:EA = 100:1). The product was obtained as a colorless oil, which quickly turns brown due to minor decomposition (690 mg, 3.18 mmol, 91%).

**R<sub>f</sub>**: 0.26 (silica gel, PE:EA = 100:1);  $^1\text{H}$  NMR (600 MHz,  $\text{CD}_2\text{Cl}_2$ ):  $\delta$  = 7.64 (d,  $J$  = 7.9 Hz, 1H), 7.58–7.55 (m, 2H), 7.53–7.51 (m, 2H), 7.49–7.46 (m, 1H), 7.28–7.26 (m, 1H), 7.25–7.23 (m, 1H), 7.19–7.16 (m, 1H), 7.02 (s, 1H), 3.35 (s, 1H);  $^{13}\text{C}\{^1\text{H}\}$  NMR (151 MHz,  $\text{CD}_2\text{Cl}_2$ ):  $\delta$  = 137.9 (s, 1C), 137.7 (s, 1C), 129.6 (d, 2C), 128.2 (d, 1C), 127.7 (d, 2C), 127.5 (s, 1C), 124.4 (d, 1C), 121.4 (d, 1C), 121.4 (d, 1C), 121.1 (s, 1C), 111.0 (d, 1C), 110.9 (d, 1C), 83.7 (d, 1C), 76.0 (s, 1C); **HR-MS** (EI+):  $m/z$  calculated for  $[\text{C}_{16}\text{H}_{11}\text{N}]^+$ ,  $[\text{M}]^+$ : 217.08860, found: 217.08991; **IR** (ATR):  $\nu$  [ $\text{cm}^{-1}$ ] = 3285, 3052, 2924, 2108, 1597, 1519, 1500, 1449, 1378, 1350, 1329, 1234, 1203, 1152, 1135, 1075, 1032, 1016, 932, 848, 797, 761, 750, 698, 676, 646, 619, 608.

## 2-((2-Fluorophenyl)ethynyl)-1-phenyl-1H-indole (1k)

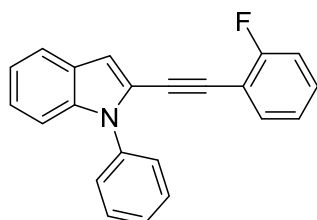

**1r-H** (200 mg, 921  $\mu\text{mol}$ ), 1-fluoro-2-iodobenzene (307 mg, 1.38 mmol),  $\text{Pd}(\text{PPh}_3)_2\text{Cl}_2$  (12.9 mg, 18.4  $\mu\text{mol}$ ) and  $\text{CuI}$  (7.01 mg, 36.8  $\mu\text{mol}$ ) in THF (5 mL) and  $\text{Et}_3\text{N}$  (5 mL) were used and treated

according to GP4 (silica gel, PE:EA = 200:1 to 50:1). The product was obtained as a pale yellow solid (247 mg, 793  $\mu$ mol, 86%).

**Mp:** 79 °C; **R<sub>f</sub>:** 0.37 (silica gel, PE:EA = 50:1); **<sup>1</sup>H{<sup>19</sup>F} NMR** (500 MHz, CD<sub>2</sub>Cl<sub>2</sub>):  $\delta$  = 7.67 (d, *J* = 7.9 Hz, 1H), 7.61–7.56 (m, 4H), 7.50–7.46 (m, 1H), 7.35–7.30 (m, 3H), 7.26–7.23 (m, 1H), 7.18 (t, *J* = 7.5 Hz, 1H), 7.12–7.06 (m, 3H); **<sup>13</sup>C{<sup>1</sup>H,<sup>19</sup>F} NMR** (126 MHz, CD<sub>2</sub>Cl<sub>2</sub>): 162.7 (s, 1C), 138.0 (s, 1C), 137.8 (s, 1C), 133.3 (d, 1C), 130.7 (d, 1C), 129.5 (d, 2C), 128.0 (d, 1C), 127.9 (s, 1C), 127.6 (d, 2C), 124.5 (d, 1C), 124.3 (d, 1C), 121.8 (s, 1C), 121.4 (d, 2C), 115.9 (d, 1C), 111.5 (s, 1C), 111.0 (d, 1C), 110.3 (d, 1C), 89.0 (s, 1C), 86.8 (s, 1C); **<sup>19</sup>F{<sup>1</sup>H} NMR** (471 MHz, CD<sub>2</sub>Cl<sub>2</sub>): -110.1 (1F); **HR-MS** (EI+): *m/z* calculated for [C<sub>22</sub>H<sub>14</sub>FN]<sup>+</sup>, [M]<sup>+</sup>: 311.11048, found: 311.11054; **IR** (ATR):  $\nu$  [cm<sup>-1</sup>] = 3059, 2962, 2922, 2214, 1948, 1799, 1596, 1571, 1537, 1500, 1489, 1476, 1449, 1415, 1379, 1360, 1335, 1318, 1260, 1225, 1213, 1173, 1150, 1128, 1115, 1099, 1075, 1030, 1016, 937, 909, 868, 823, 795, 758, 708, 696, 636, 608.

### 2-((2-Bromophenyl)ethynyl)-1-phenyl-1*H*-indole (1I)

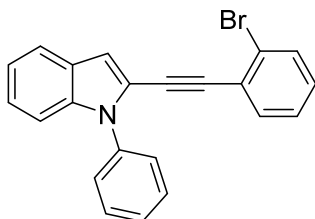

**1r-H** (254 mg, 1.17 mmol), 1-bromo-2-iodobenzene (496 mg, 1.75 mmol), Pd(PPh<sub>3</sub>)<sub>2</sub>Cl<sub>2</sub> (16.4 mg, 23.4  $\mu$ mol) and CuI (8.91 mg, 46.8  $\mu$ mol) in THF (5 mL) and Et<sub>3</sub>N (5 mL) were used and treated according to GP4 (silica gel, PE:EA = 200:1 to 100:1). The product was obtained as a pale yellow solid (344 mg, 924  $\mu$ mol, 79%).

**Mp:** 73 °C; **R<sub>f</sub>:** 0.20 (silica gel, PE:EA = 100:1); **<sup>1</sup>H NMR** (700 MHz, CD<sub>2</sub>Cl<sub>2</sub>):  $\delta$  = 7.67 (d, *J* = 7.9 Hz, 1H), 7.60–7.55 (m, 5H), 7.47 (t, *J* = 7.0 Hz, 1H), 7.39 (d, *J* = 7.7 Hz, 1H), 7.30–7.23 (m, 3H), 7.18 (t, *J* = 7.3 Hz, 2H), 7.09 (s, 1H); **<sup>13</sup>C{<sup>1</sup>H} NMR** (176 MHz, CD<sub>2</sub>Cl<sub>2</sub>): 138.2 (s, 1C), 137.9 (s, 1C), 133.5 (d, 1C), 132.8 (d, 1C), 130.0 (d, 1C), 129.7 (d, 2C), 128.1 (d, 1C), 127.9 (s, 1C), 127.9 (d, 2C), 127.5 (d, 1C), 125.2 (s, 1C), 125.1 (s, 1C), 124.3 (d, 1C), 121.9 (s, 1C), 121.4 (d, 2C), 110.9 (d, 1C), 110.5 (d, 1C), 93.9 (s, 1C), 86.2 (s, 1C); **HR-MS** (EI+): *m/z* calculated for [C<sub>22</sub>H<sub>14</sub><sup>79</sup>BrN]<sup>+</sup>, [M]<sup>+</sup>: 371.03041, found: 371.02990; **IR** (ATR):  $\nu$  [cm<sup>-1</sup>] = 3055, 2210, 1949, 1908, 1877, 1595, 1499, 1483, 1463, 1446, 1430, 1382, 1359, 1336, 1320, 1252, 1220, 1150, 1134, 1113, 1076, 1049, 1025, 943, 909, 804, 781, 750, 731, 697, 664, 633.

### 1-Phenyl-2-(thiophen-2-ylethynyl)-1H-indole (1m)

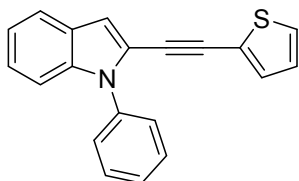

**1r-H** (181 mg, 831  $\mu\text{mol}$ ), 2-iodothiophene (262 mg, 1.25 mmol),  $\text{Pd}(\text{PPh}_3)_2\text{Cl}_2$  (11.7 mg, 16.6  $\mu\text{mol}$ ) and  $\text{CuI}$  (6.33 mg, 33.2  $\mu\text{mol}$ ) in THF (5 mL) and  $\text{Et}_3\text{N}$  (5 mL) were used and treated according to GP4 (silica gel, PE:DCM = 50:1). The product was obtained as an off-white solid (185 mg, 618  $\mu\text{mol}$ , 74%).

**Mp**: 56 °C; **R<sub>f</sub>**: 0.63 (silica gel, PE:EA = 20:1); **<sup>1</sup>H NMR** (400 MHz,  $\text{CD}_2\text{Cl}_2$ ):  $\delta$  = 7.67–7.65 (m, 1H), 7.61–7.56 (m, 4H), 7.51–7.45 (m, 1H), 7.34–7.31 (m, 2H), 7.26–7.22 (m, 1H), 7.20–7.16 (m, 2H), 7.02 (d,  $J$  = 0.7 Hz, 1H), 6.99 (dd,  $J$  = 5.1 Hz,  $J$  = 3.7 Hz, 1H); **<sup>13</sup>C{<sup>1</sup>H} NMR** (101 MHz,  $\text{CD}_2\text{Cl}_2$ ): 138.1 (s, 1C), 138.0 (s, 1C), 132.5 (d, 1C), 129.6 (d, 2C), 128.3 (d, 1C), 128.1 (d, 1C), 128.1 (s, 1C), 127.6 (d, 1C), 127.5 (d, 2C), 124.3 (d, 1C), 122.9 (s, 1C), 122.0 (s, 1C), 121.4 (d, 1C), 121.4 (d, 1C), 110.9 (d, 1C); 110.0 (d, 1C), 88.8 (s, 1C), 85.6 (s, 1C); **HR-MS** (EI<sup>+</sup>):  $m/z$  calculated for  $[\text{C}_{20}\text{H}_{13}\text{NS}]^+$ ,  $[\text{M}]^+$ : 299.07632, found: 299.07492; **IR** (ATR):  $\nu$  [ $\text{cm}^{-1}$ ] = 3104, 3057, 2202, 1596, 1500, 1451, 1419, 1377, 1317, 1256, 1223, 1209, 1182, 1148, 1113, 1075, 1043, 1015, 931, 844, 794, 761, 749, 701, 642.

### 1-Phenyl-2-(pyridin-3-ylethynyl)-1H-indole (1n)

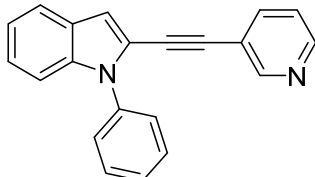

**1r-H** (197 mg, 907  $\mu\text{mol}$ ), 3-bromopyridine (215 mg, 1.36 mmol),  $\text{Pd}(\text{PPh}_3)_2\text{Cl}_2$  (12.7 mg, 18.1  $\mu\text{mol}$ ) and  $\text{CuI}$  (6.91 mg, 36.3  $\mu\text{mol}$ ) in THF (5 mL) and  $\text{Et}_3\text{N}$  (5 mL) were used and treated according to GP4 (silica gel, PE:DCM = 5:1). The product was obtained as a pale yellow oil (89.5 mg, 304  $\mu\text{mol}$ , 34%).

**R<sub>f</sub>**: 0.10 (silica gel, PE:EA = 10:1); **<sup>1</sup>H NMR** (301 MHz,  $\text{CDCl}_3$ ):  $\delta$  = 8.53 (d,  $J$  = 1.4 Hz, 1H), 8.50 (dd,  $J$  = 4.9 Hz,  $J$  = 1.7 Hz, 1H), 7.67 (d,  $J$  = 7.5 Hz, 1H), 7.62–7.54 (m, 5H), 7.51–7.44 (m, 1H), 7.32 (d,  $J$  = 8.3 Hz, 1H), 7.28–7.16 (m, 3H), 7.05 (d,  $J$  = 0.5 Hz, 1H); **HR-MS** (EI<sup>+</sup>):  $m/z$  calculated for  $[\text{C}_{21}\text{H}_{14}\text{N}_2]^+$ ,  $[\text{M}]^+$ : 294.11515, found: 294.11514.

The spectroscopic data correspond to those previously reported in the literature.<sup>[13]</sup>

### 3-Bromo-1-phenyl-2-(phenylethynyl)-1H-indole (1s)

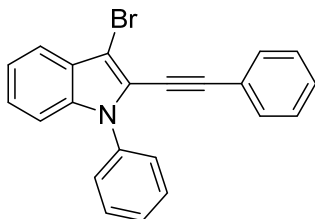

To a solution of **1a** (102 mg, 349  $\mu\text{mol}$ ) in DCM (5 mL) *N*-bromosuccinimide (156 mg, 365  $\mu\text{mol}$ ) was added and the reaction mixture was stirred at rt for 4 h. A saturated aqueous solution of  $\text{Na}_2\text{SO}_3$  (3 mL) and water (5 mL) was added and the mixture was extracted with DCM. The combined organic layers were washed with water and brine, dried over  $\text{Na}_2\text{SO}_4$ , filtered through a plug of silica gel and the solvent was removed under reduced pressure. The product was obtained as a pale yellow oil (91.5 mg, 246  $\mu\text{mol}$ , 71%).

**R<sub>f</sub>**: 0.50 (silica gel, PE:EA = 20:1); **<sup>1</sup>H NMR** (300 MHz,  $\text{CDCl}_3$ ):  $\delta$  = 7.64–7.53 (m, 5H), 7.51–7.44 (m, 1H), 7.40–7.35 (m, 2H), 7.34–7.22 (m, 6H); **<sup>13</sup>C{<sup>1</sup>H} NMR** (75 MHz,  $\text{CDCl}_3$ ): 137.5 (s, 1C), 136.8 (s, 1C), 131.5 (d, 2C), 129.3 (d, 2C), 128.9 (d, 1C), 128.5 (d, 2C), 128.1 (d, 1C), 127.3 (d, 2C), 127.0 (s, 1C), 124.9 (d, 1C), 122.5 (s, 1C), 121.8 (s, 1C), 121.7 (d, 1C), 119.8 (d, 1C), 110.8 (d, 1C), 99.3 (s, 1C), 99.2 (s, 1C), 80.0 (s, 1C); **HR-MS** (EI+): *m/z* calculated for  $[\text{C}_{22}\text{H}_{14}^{79}\text{BrN}]^+$ ,  $[\text{M}]^+$ : 371.03041, found: 371.03097; **IR** (ATR):  $\nu$  [ $\text{cm}^{-1}$ ] = 3060, 2212, 1949, 1891, 1804, 1596, 1499, 1486, 1448, 1378, 1340, 1325, 1217, 1149, 1117, 1070, 1043, 1023, 938, 839, 778, 742, 689, 648, 621.

### 3-Iodo-1-phenyl-2-(phenylethynyl)-1H-indole (1t)

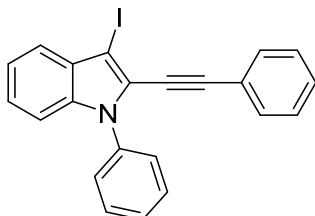

To a solution of **1a** (200 mg, 682  $\mu\text{mol}$ ) in DCM (10 mL) *N*-iodosuccinimide (156 mg, 695  $\mu\text{mol}$ ) was added and the reaction mixture was stirred at rt for 4 h. A saturated aqueous solution of  $\text{Na}_2\text{SO}_3$  (5 mL) and water (10 mL) was added and the mixture was extracted with DCM. The combined organic layers were washed with water and brine, dried over  $\text{Na}_2\text{SO}_4$ , filtered through a plug of silica gel and the solvent was removed under reduced pressure. The product was obtained as a pale yellow oil (280 mg, 668  $\mu\text{mol}$ , 98%).

**R<sub>f</sub>**: 0.63 (silica gel, PE:EA = 10:1); **<sup>1</sup>H NMR** (400 MHz,  $\text{CDCl}_3$ ):  $\delta$  = 7.60–7.55 (m, 4H), 7.53–7.46 (m, 2H), 7.41–7.38 (m, 2H), 7.34–7.30 (m, 3H), 7.29–7.24 (m, 3H); **<sup>13</sup>C{<sup>1</sup>H} NMR** (101 MHz,  $\text{CDCl}_3$ ): 137.8 (s, 1C), 137.6 (s, 1C), 131.5 (d, 2C), 130.3 (s, 1C), 129.3 (d, 2C), 128.9 (d, 1C), 128.5 (d, 2C), 128.1 (d, 1C), 127.3 (d, 2C), 126.1 (s, 1C), 124.9 (d, 1C), 122.6 (s, 1C), 121.9 (d, 1C), 121.8 (d, 1C), 110.9 (d, 1C), 98.6 (s, 1C), 81.6 (s, 1C), 68.4 (s, 1C); **HR-MS** (EI+): *m/z* calculated for  $[\text{C}_{22}\text{H}_{14}\text{IN}]^+$ ,  $[\text{M}]^+$ : 419.01654, found: 419.01610; **IR** (ATR):  $\nu$  [ $\text{cm}^{-1}$ ] = 3058, 2924, 2853, 2210, 1735, 1654, 1596, 1499,



1484, 1447, 1375, 1350, 1317, 1262, 1216, 1149, 1116, 1070, 1039, 1021, 937, 910, 842, 776, 754, 697, 648, 620.

### 3-(2,6-Dimethylphenyl)-1-phenyl-2-(phenylethynyl)-1*H*-indole (1o)

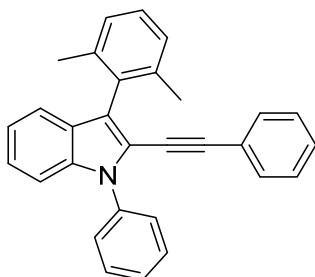

A Schlenk flask containing **1t** (131 mg, 313  $\mu\text{mol}$ ), (2,6-dimethylphenyl)boronic acid (70.5 mg, 470  $\mu\text{mol}$ ),  $\text{Pd}_2(\text{dba})_3$  (2.87 mg, 3.13  $\mu\text{mol}$ ), XPhos (5.98 mg, 12.5  $\mu\text{mol}$ ) and  $\text{K}_2\text{CO}_3$  (130 mg, 940  $\mu\text{mol}$ ) was evacuated and refilled with nitrogen three times. Then, a degassed 4:1 mixture of 1,4-dioxane and water (6 mL) was added and the resulting mixture was stirred at 100 °C for 16 h. The solvents were removed under reduced pressure and then, water (20 mL) was added. The mixture was extracted with ethyl acetate and the combined organic layers were washed with water and brine and dried over  $\text{Na}_2\text{SO}_4$ . The solvent was removed under reduced pressure and the residue was purified by flash column chromatography (silica gel, PE:EA = 100:1). The product was obtained as a pale yellow solid (42.4 mg, 107  $\mu\text{mol}$ , 34%).

**Mp**: 154 °C; **R<sub>f</sub>**: 0.24 (silica gel, PE:EA = 50:1); **<sup>1</sup>H NMR** (400 MHz,  $\text{CDCl}_3$ ):  $\delta$  = 7.69–7.67 (m, 2H), 7.62–7.58 (m, 2H), 7.49–7.45 (m, 1H), 7.43 (d,  $J$  = 8.2 Hz, 1H), 7.31–7.19 (m, 8H), 7.17–7.11 (m, 3H), 2.23 (s, 6H); **<sup>13</sup>C{<sup>1</sup>H} NMR** (101 MHz,  $\text{CDCl}_3$ ): 138.6 (s, 2C), 138.0 (s, 1C), 137.4 (s, 1C), 132.7 (s, 1C), 131.2 (d, 2C), 129.2 (d, 2C), 128.3 (d, 3C), 127.6 (d, 1C) 127.6 (d, 1C), 127.4 (d, 2C), 127.3 (d, 2C), 127.3 (s, 1C), 124.0 (d, 1C), 123.1 (s, 1C), 123.0 (s, 1C), 120.9 (d, 1C), 120.6 (d, 1C), 120.3 (s, 1C), 110.7 (d, 1C), 97.5 (s, 1C), 81.7 (s, 1C), 20.9 (q, 2C); **HR-MS** (EI<sup>+</sup>):  $m/z$  calculated for  $[\text{C}_{30}\text{H}_{23}\text{N}]^+$ ,  $[\text{M}]^+$ : 397.18250, found: 397.18246; **IR** (ATR):  $\nu$  [ $\text{cm}^{-1}$ ] = 3060, 2924, 2855, 2208, 1597, 1500, 1451, 1369, 1323, 1264, 1234, 1189, 1166, 1096, 1071, 1018, 941, 802, 756, 691, 664, 625.

### 2-Ethynyl-3-methyl-1-phenyl-1*H*-indole (1q)

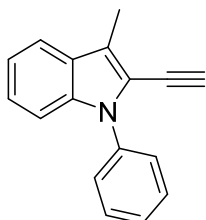

According to a procedure by Hashmi *et al.*,<sup>[14]</sup> to a mixture of **S8** (519 mg, 2.21 mmol) and  $\text{K}_2\text{CO}_3$  (610 mg, 4.41 mmol) in methanol (10 mL) and DCM (20 mL) was added dimethyl (1-diazo-2-oxopropyl)phosphonate (636 mg, 3.31 mmol) and the resulting mixture was stirred at rt for 2 d. Water

was added and the mixture was extracted with DCM. The combined organic layers were washed with water and brine and dried over Na<sub>2</sub>SO<sub>4</sub>. The solvent was removed under reduced pressure and the residue was purified by flash column chromatography (silica gel, PE). The product was obtained as a colorless oil, which quickly turns bluish black due to minor decomposition (313 mg, 1.35 mmol, 61%).

**R<sub>f</sub>**: 0.65 (silica gel, PE:EA = 20:1); **<sup>1</sup>H NMR** (400 MHz, CD<sub>2</sub>Cl<sub>2</sub>): δ = 7.64–7.62 (m, 1H), 7.58–7.50 (m, 4H), 7.47–7.43 (m, 1H), 7.30–7.23 (m, 2H), 7.21–7.17 (m, 1H), 3.53 (s, 1H), 2.51 (s, 3H);

**<sup>13</sup>C{<sup>1</sup>H} NMR** (101 MHz, CD<sub>2</sub>Cl<sub>2</sub>): 137.8 (s, 1C), 137.1 (s, 1C), 129.1 (d, 2C), 127.6 (s, 1C), 127.3 (d, 1C), 127.1 (d, 2C), 124.1 (d, 1C), 120.3 (d, 1C), 120.3 (s, 1C), 119.4 (d, 1C), 118.8 (s, 1C), 110.3 (d, 1C), 85.9 (s, 1C), 75.2 (d, 1C), 9.4 (q, 1C); **HR-MS** (EI+): *m/z* calculated for [C<sub>17</sub>H<sub>13</sub>N]<sup>+</sup>, [M]<sup>+</sup>:

231.10425, found: 231.10421; **IR** (ATR): ν [cm<sup>-1</sup>] = 3289, 3055, 2916, 2855, 2103, 1598, 1501, 1450, 1367, 1326, 1235, 1152, 1128, 1094, 1075, 1012, 938, 744, 699, 681, 643, 629.

### 3-Methyl-1-phenyl-2-(phenylethynyl)-1*H*-indole (1p)

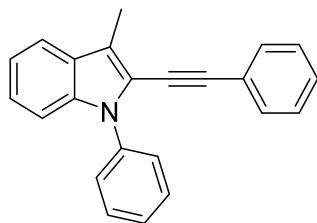

**1q** (93.6 mg, 405 μmol), iodobenzene (124 mg, 607 μmol), Pd(PPh<sub>3</sub>)<sub>2</sub>Cl<sub>2</sub> (5.68 mg, 8.09 μmol) and CuI (3.08 mg, 16.2 μmol) in THF (5 mL) and Et<sub>3</sub>N (5 mL) were used and treated according to GP4 (silica gel, PE to PE:EA = 20:1). The product was obtained as a pale yellow oil (108 mg, 351 μmol, 87%).

**R<sub>f</sub>**: 0.16 (silica gel, PE:EA = 100:1); **<sup>1</sup>H NMR** (300 MHz, CDCl<sub>3</sub>): δ = 7.62 (d, *J* = 7.5 Hz, 1H), 7.60–7.51 (m, 4H), 7.44–7.15 (m, 9H), 2.55 (s, 3H); **<sup>13</sup>C{<sup>1</sup>H} NMR** (75 MHz, CDCl<sub>3</sub>): 138.1 (s, 1C), 137.3 (s, 1C), 131.1 (d, 2C), 129.1 (d, 2C), 128.4 (d, 2C), 128.3 (d, 1C), 128.1 (s, 1C), 127.3 (d, 1C), 127.2 (d, 2C), 124.0 (d, 1C), 123.2 (s, 1C), 120.4 (d, 1C), 120.2 (s, 1C), 119.5 (d, 1C), 119.1 (s, 1C), 110.5 (d, 1C), 98.1 (s, 1C), 81.4 (s, 1C), 10.1 (q, 1C); **HR-MS** (EI+): *m/z* calculated for [C<sub>23</sub>H<sub>17</sub>N]<sup>+</sup>, [M]<sup>+</sup>:

307.13555, found: 307.13556; ; **IR** (ATR): ν [cm<sup>-1</sup>] = 3055, 2913, 2856, 2207, 1948, 1885, 1801, 1671, 1597, 1572, 1499, 1451, 1402, 1379, 1367, 1330, 1268, 1226, 1188, 1174, 1150, 1127, 1092, 1071, 1026, 1012, 921, 840, 755, 696, 655, 641, 625.

### 5-Phenylindolo[1,2-a]quinoline (2a)

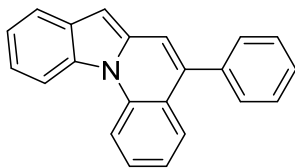

**1a** (44.0 mg, 150  $\mu\text{mol}$ ) and JohnPhosAu(MeCN)SbF<sub>6</sub> (2.90 mg, 3.75  $\mu\text{mol}$ ) in *o*-dichlorobenzene (15 mL) were used and treated according to GP5 (silica gel, PE:EA = 100:1). The product was obtained as a yellow solid (39.9 mg, 136  $\mu\text{mol}$ , 91%).

Gram scale synthesis:

**1a** (1.02 g, 3.48 mmol) and JohnPhosAu(MeCN)SbF<sub>6</sub> (67.1 mg, 86.9  $\mu\text{mol}$ ) in *o*-dichlorobenzene (300 mL) were used and treated according to GP5 (silica gel, PE:EA = 100:1). The product was obtained as a yellow solid (883 mg, 3.01 mmol, 87%).

**Mp**: 82 °C; **R<sub>f</sub>**: 0.23 (silica gel, PE:EA = 100:1); **<sup>1</sup>H NMR** (301 MHz, CD<sub>2</sub>Cl<sub>2</sub>):  $\delta$  = 8.67–8.65 (m, 1H), 8.52–8.49 (m, 1H), 7.89–7.86 (m, 1H), 7.70 (dd,  $J$  = 8.0 Hz,  $J$  = 1.5 Hz, 1H), 7.68–7.62 (m, 1H), 7.56–7.38 (m, 7H), 7.32 (s, 1H), , 7.31–7.25 (m, 1H), 6.84 (s, 1H); **<sup>13</sup>C{<sup>1</sup>H} NMR** (101 MHz, CD<sub>2</sub>Cl<sub>2</sub>): 139.6 (s, 1C), 137.4 (s, 1C), 136.4 (s, 1C), 136.0 (s, 1C), 133.3 (s, 1C), 131.0 (s, 1C), 130.0 (d, 2C), 129.1 (d, 1C), 128.9 (d, 2C), 128.2 (d, 1C), 128.0 (d, 1C), 124.3 (s, 1C), 123.1 (d, 1C), 122.3 (d, 1C), 122.1 (d, 1C), 121.4 (d, 1C), 119.8 (d, 1C), 116.1 (d, 1C), 114.7 (d, 1C), 97.6 (d, 1C); **HR-MS** (EI<sup>+</sup>):  $m/z$  calculated for [C<sub>22</sub>H<sub>15</sub>N]<sup>+</sup>, [M]<sup>+</sup>: 293.11990, found: 293.12167; **IR** (ATR):  $\nu$  [cm<sup>-1</sup>] = 3054, 2922, 2850, 1735, 1599, 1561, 1492, 1472, 1445, 1383, 1334, 1283, 1253, 1202, 1153, 1133, 1064, 1025, 960, 878, 775, 751, 721, 703, 670, 632, 613; **UV-Vis** (DCM):  $\lambda_{\text{max}}$  [nm] = 257, 290, 341, 359, 384, 403, 424; (dioxane):  $\lambda_{\text{max}}$  [nm] = 255, 283, 292, 325, 341, 358, 384, 402, 424; (cyclohexane):  $\lambda_{\text{max}}$  [nm] = 256, 284, 290, 326, 341, 359, 384, 404, 428; **fluorescence** (DCM):  $\lambda_{\text{ex}}$  [nm] = 420,  $\lambda_{\text{max}}$  [nm] = 454, 474, 504; (dioxane):  $\lambda_{\text{ex}}$  [nm] = 385,  $\lambda_{\text{max}}$  [nm] = 451, 473, 503; (cyclohexane):  $\lambda_{\text{ex}}$  [nm] = 385,  $\lambda_{\text{max}}$  [nm] = 443, 469, 503; (powder):  $\lambda_{\text{ex}}$  [nm] = 385,  $\lambda_{\text{max}}$  [nm] = 483, 515, 537, 579; **quantum yield** (DCM):  $\Phi$  = 79%; (dioxane):  $\Phi$  = 76%; (cyclohexane):  $\Phi$  = 57%.

### 3-Methoxy-5-phenylindolo[1,2-a]quinoline (2b)

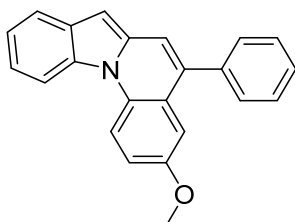

**1b** (53.0 mg, 164  $\mu\text{mol}$ ) and JohnPhosAu(MeCN)SbF<sub>6</sub> (3.16 mg, 4.10  $\mu\text{mol}$ ) in *o*-dichlorobenzene (15 mL) were used and treated according to GP5 (silica gel, PE:EA = 50:1). The product was obtained as a yellow solid (34.8 mg, 108  $\mu\text{mol}$ , 66%).

**Mp**: 128 °C; **R<sub>f</sub>**: 0.45 (silica gel, PE:EA = 20:1); **<sup>1</sup>H NMR** (301 MHz, CDCl<sub>3</sub>):  $\delta$  = 8.60–8.57 (m, 1H), 8.46–8.42 (m, 1H), 7.88–7.85 (m, 1H), 7.54–7.43 (m, 5H), 7.42–7.34 (m, 2H), 7.31 (s, 1H), 7.23–7.20

(m, 2H), 6.81 (s, 1H), 3.79 (s, 3H);  $^{13}\text{C}\{^1\text{H}\}$  NMR (151 MHz,  $\text{CDCl}_3$ ): 154.9 (s, 1C), 139.2 (s, 1C), 135.7 (s, 1C), 135.2 (s, 1C), 132.8 (s, 1C), 131.6 (s, 1C), 130.3 (s, 1C), 129.6 (d, 2C), 128.7 (d, 2C), 127.9 (d, 1C), 125.4 (s, 1C), 121.8 (d, 1C), 121.7 (d, 1C), 121.3 (d, 1C), 120.2 (d, 1C), 116.8 (d, 1C), 115.1 (d, 1C), 114.1 (d, 1C), 111.7 (d, 1C), 97.0 (d, 1C), 55.7 (q, 1C); **HR-MS** (EI+):  $m/z$  calculated for  $[\text{C}_{23}\text{H}_{17}\text{NO}]^+$ ,  $[\text{M}]^+$ : 323.13047, found: 323.12943; **IR** (ATR):  $\nu$  [ $\text{cm}^{-1}$ ] = 3053, 2923, 2851, 1614, 1571, 1561, 1479, 1452, 1424, 1375, 1332, 1303, 1256, 1235, 1202, 1146, 1109, 1052, 1030, 970, 880, 801, 773, 740, 712, 702, 672; **UV-Vis** (DCM):  $\lambda_{\text{max}}$  [nm] = 258, 297, 332, 343, 359, 395, 412, 432; **fluorescence** (DCM):  $\lambda_{\text{ex}}$  [nm] = 420,  $\lambda_{\text{max}}$  [nm] = 464, 486, 520; **quantum yield** (DCM):  $\Phi = 70\%$ .

### 2,3,4-Trimethoxy-5-phenylindolo[1,2-a]quinoline (2c)

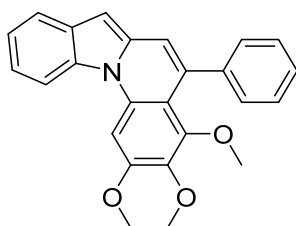

**1c** (73.0 mg, 190  $\mu\text{mol}$ ) and JohnPhosAu(MeCN)SbF<sub>6</sub> (3.68 mg, 4.76  $\mu\text{mol}$ ) in *o*-dichlorobenzene (18 mL) were used and treated according to GP5 (silica gel, PE:EA = 20:1). The product was obtained as a yellow solid (63.2 mg, 165  $\mu\text{mol}$ , 87%).

**Mp**: 164–167 °C; **R<sub>f</sub>**: 0.34 (silica gel, PE:EA = 10:1);  $^1\text{H}$  NMR (400 MHz,  $\text{CDCl}_3$ ):  $\delta$  = 8.42–8.38 (m, 1H), 8.00 (s, 1H), 7.88–7.84 (m, 1H), 7.46–7.34 (m, 7H), 7.08 (s, 1H), 6.74 (s, 1H), 4.15 (s, 3H), 3.92 (s, 3H), 3.31 (s, 3H);  $^{13}\text{C}\{^1\text{H}\}$  NMR (101 MHz,  $\text{CDCl}_3$ ): 154.1 (s, 1C), 151.9 (s, 1C), 143.2 (s, 1C), 138.9 (s, 1C), 135.9 (s, 1C), 134.3 (s, 1C), 133.9 (s, 1C), 132.5 (s, 1C), 131.1 (s, 1C), 128.4 (d, 2C), 127.3 (d, 2C), 126.4 (d, 1C), 122.1 (d, 1C), 121.2 (d, 1C), 121.2 (d, 1C), 119.8 (d, 1C), 113.8 (d, 1C), 112.3 (s, 1C), 96.3 (d, 1C), 95.9 (d, 1C), 61.2 (d, 1C), 61.0 (d, 1C), 56.4 (d, 1C); **HR-MS** (DART+):  $m/z$  calculated for  $[\text{C}_{25}\text{H}_{22}\text{NO}_3]^+$ ,  $[\text{M}+\text{H}]^+$ : 384.1594, found: 384.1596; **IR** (ATR):  $\nu$  [ $\text{cm}^{-1}$ ] = 2919, 2850, 1600, 1553, 1490, 1478, 1448, 1411, 1363, 1323, 1278, 1263, 1233, 1200, 1134, 1122, 1100, 1055, 1032, 995, 951, 868, 799, 770, 744, 732, 711, 698, 664, 634; **UV-Vis** (DCM):  $\lambda_{\text{max}}$  [nm] = 252, 279, 290, 299, 343, 365, 385, 404, 425; **fluorescence** (DCM):  $\lambda_{\text{ex}}$  [nm] = 420,  $\lambda_{\text{max}}$  [nm] = 454, 472, 504; **quantum yield** (DCM):  $\Phi = 90\%$ .

### 5-Phenyl-3-(trifluoromethyl)indolo[1,2-a]quinoline (2d)

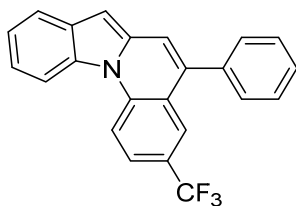

**1d** (42.5 mg, 118  $\mu\text{mol}$ ) and JohnPhosAu(MeCN)SbF<sub>6</sub> (2.27 mg, 2.94  $\mu\text{mol}$ ) in *o*-dichlorobenzene (15 mL) were used and treated according to GP5 (silica gel, PE:EA = 100:1). The product was obtained as a yellow solid (35.7 mg, 98.8  $\mu\text{mol}$ , 84%).

**Mp:** 112 °C; **R<sub>f</sub>:** 0.25 (silica gel, PE:EA = 100:1); **<sup>1</sup>H{<sup>19</sup>F} NMR** (301 MHz, CDCl<sub>3</sub>):  $\delta$  = 8.68 (d, *J* = 8.8 Hz, 1H), 8.44 (d, *J* = 8.0 Hz, 1H), 7.94 (d, *J* = 2.1 Hz, 1H), 7.90–7.82 (m, 2H), 7.57–7.41 (m, 7H), 7.36 (s, 1H), 6.86 (s, 1H); **<sup>13</sup>C{<sup>1</sup>H,<sup>19</sup>F} NMR** (126 MHz, CDCl<sub>3</sub>): 139.1 (s, 1C), 138.3 (s, 1C), 135.8 (s, 1C), 134.8 (s, 1C), 133.1 (s, 1C), 130.9 (s, 1C), 129.5 (d, 2C), 128.9 (d, 2C), 128.3 (d, 1C), 125.3 (d, 1C), 124.6 (d, 1C), 124.6 (s, 1C), 124.3 (s, 1C), 124.1 (s, 1C), 122.7 (d, 1C), 122.6 (d, 1C), 121.6 (d, 1C), 121.0 (d, 1C), 115.9 (d, 1C), 114.4 (d, 1C), 98.7 (d, 1C); **<sup>19</sup>F{<sup>1</sup>H} NMR** (283 MHz, CDCl<sub>3</sub>): -61.8 (3F); **HR-MS** (EI<sup>+</sup>): *m/z* calculated for [C<sub>23</sub>H<sub>14</sub>F<sub>3</sub>N]<sup>+</sup>, [M]<sup>+</sup>: 361.10729, found: 361.10618; **IR** (ATR):  $\nu$  [cm<sup>-1</sup>] = 3054, 2919, 2850, 1616, 1574, 1542, 1493, 1452, 1360, 1345, 1319, 1300, 1277, 1254, 1205, 1169, 1152, 1123, 1086, 1034, 966, 908, 881, 845, 807, 773, 743, 729, 704, 685, 659; **UV-Vis** (DCM):  $\lambda_{\text{max}}$  [nm] = 283, 296, 307, 334, 351, 369, 386, 405, 428; **fluorescence** (DCM):  $\lambda_{\text{ex}}$  [nm] = 420,  $\lambda_{\text{max}}$  [nm] = 460, 478, 514; **quantum yield** (DCM):  $\Phi$  = 72%.

### 3-Bromo-5-phenylindolo[1,2-a]quinoline (2e)

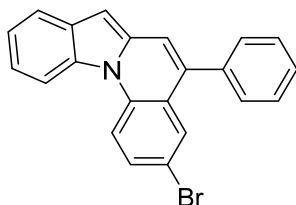

**1e** (82.5 mg, 222  $\mu\text{mol}$ ) and JohnPhosAu(MeCN)SbF<sub>6</sub> (4.28 mg, 5.54  $\mu\text{mol}$ ) in *o*-dichlorobenzene (25 mL) were used and treated according to GP5 (silica gel, PE:EA = 50:1). The product was obtained as a yellow solid (50.1 mg, 135  $\mu\text{mol}$ , 61%).

**Mp:** 165 °C; **R<sub>f</sub>:** 0.50 (silica gel, PE:EA = 20:1); **<sup>1</sup>H NMR** (400 MHz, CDCl<sub>3</sub>):  $\delta$  = 8.48 (d, *J* = 9.0 Hz, 1H), 8.38 (d, *J* = 8.4 Hz, 1H), 7.88–7.86 (m, 1H), 7.77 (d, *J* = 2.3 Hz, 1H), 7.68 (dd, *J* = 8.9 Hz, *J* = 2.3 Hz, 1H), 7.55–7.39 (m, 7H), 7.31 (s, 1H), 6.83 (s, 1H); **<sup>13</sup>C{<sup>1</sup>H} NMR** (101 MHz, CDCl<sub>3</sub>): 138.6 (s, 1C), 136.0 (s, 1C), 135.7 (s, 1C), 134.5 (s, 1C), 133.0 (s, 1C), 131.3 (d, 1C), 130.7 (s, 1C), 130.0 (d, 1C), 129.6 (d, 2C), 128.9 (d, 2C), 128.2 (d, 1C), 126.1 (s, 1C), 122.4 (d, 1C), 122.3 (d, 1C), 121.5 (d, 1C), 120.8 (d, 1C), 117.3 (d, 1C), 115.8 (s, 1C), 114.3 (d, 1C), 98.1 (d, 1C); **HR-MS** (EI<sup>+</sup>): *m/z* calculated for [C<sub>22</sub>H<sub>14</sub><sup>79</sup>BrN]<sup>+</sup>, [M]<sup>+</sup>: 371.03041, found: 371.03039; **IR** (ATR):  $\nu$  [cm<sup>-1</sup>] = 2922, 2851, 1650, 1612, 1547, 1493, 1468, 1453, 1414, 1367, 1261, 1203, 1093, 1023, 960, 887, 802, 771, 740,

721, 704, 665, 631; **UV-Vis** (DCM):  $\lambda_{\max}$  [nm] = 261, 295, 347, 368, 392, 411, 432; **fluorescence** (DCM):  $\lambda_{\text{ex}}$  [nm] = 345,  $\lambda_{\text{max}}$  [nm] = 463, 485, 518.

### 3-Nitro-5-phenylindolo[1,2-a]quinoline (2f)

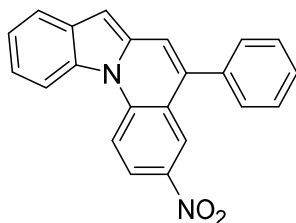

**1f** (51.7 mg, 153  $\mu\text{mol}$ ) and JohnPhosAu(MeCN)SbF<sub>6</sub> (2.95 mg, 3.82  $\mu\text{mol}$ ) in *o*-dichlorobenzene (16 mL) were used and treated according to GP5. After stirring at 170 °C for 4 h, TLC did not show full conversion. JohnPhosAu(MeCN)SbF<sub>6</sub> (2.95 mg, 3.82  $\mu\text{mol}$ ) was added and the solution was stirred at 180 °C for 12 h. The solvent was removed under reduced pressure and the residue was purified by flash column chromatography (silica gel, PE:DCM = 10:1 to 1:1). The product was obtained as a red-orange solid (31.5 mg, 93.1  $\mu\text{mol}$ , 61%).

**Mp**: 227 °C; **R<sub>f</sub>**: 0.58 (silica gel, PE:EA = 5:1); **<sup>1</sup>H NMR** (600 MHz, CDCl<sub>3</sub>):  $\delta$  = 8.66 (d, *J* = 9.2 Hz, 1H), 8.56 (d, *J* = 2.4 Hz, 1H), 8.46–8.42 (m, 2H), 7.89 (d, *J* = 7.7 Hz, 1H), 7.57–7.55 (m, 2H), 7.52–7.50 (m, 4H), 7.47 (t, *J* = 7.4 Hz, 1H), 7.39 (s, 1H), 6.90 (s, 1H); **<sup>13</sup>C{<sup>1</sup>H} NMR** (151 MHz, CDCl<sub>3</sub>): 142.4 (s, 1C), 141.1 (s, 1C), 137.7 (s, 1C), 135.8 (s, 1C), 134.7 (s, 1C), 133.3 (s, 1C), 131.2 (s, 1C), 129.5 (d, 2C), 129.2 (d, 2C), 128.7 (d, 1C), 124.5 (s, 1C), 123.8 (d, 1C), 123.4 (d, 1C), 123.2 (d, 1C), 123.2 (d, 1C), 121.9 (d, 1C), 121.5 (d, 1C), 115.8 (d, 1C), 114.5 (d, 1C), 100.0 (d, 1C); **HR-MS** (EI<sup>+</sup>): *m/z* calculated for [C<sub>22</sub>H<sub>14</sub>N<sub>2</sub>O<sub>2</sub>]<sup>+</sup>, [M]<sup>+</sup>: 338.10498, found: 338.10488; **IR** (ATR):  $\nu$  [cm<sup>-1</sup>] = 3154, 3061, 2922, 2629, 2463, 1895, 1598, 1572, 1512, 1494, 1477, 1445, 1430, 1317, 1280, 1247, 1202, 1183, 1148, 1093, 1078, 1035, 971, 929, 904, 883, 869, 814, 787, 775, 765, 753, 736, 720, 705, 662, 635; **UV-Vis** (DCM):  $\lambda_{\max}$  [nm] = 258, 267, 332, 403; (dioxane):  $\lambda_{\max}$  [nm] = 257, 266, 330, 402; (cyclohexane):  $\lambda_{\max}$  [nm] = 254, 280, 319, 330, 391, 405; **fluorescence** (DCM): not observed; (dioxane): not observed; (cyclohexane):  $\lambda_{\text{ex}}$  [nm] = 400,  $\lambda_{\text{max}}$  [nm] = 482, 514, 544; **quantum yield** (cyclohexane):  $\Phi$  = 8%.

### 4-Phenylthieno[3',2':5,6]pyrido[1,2-a]indole (2g)

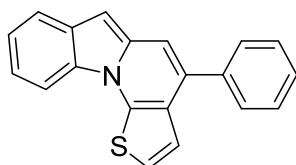

**1g** (79.0 mg, 264  $\mu\text{mol}$ ) and JohnPhosAu(MeCN)SbF<sub>6</sub> (5.09 mg, 6.60  $\mu\text{mol}$ ) in *o*-dichlorobenzene (20 mL) were used and treated according to GP5 (silica gel, PE:EA = 200:1). The product was obtained as a yellow solid (67.0 mg, 224  $\mu\text{mol}$ , 85%).

**Mp:** 125 °C; **R<sub>f</sub>:** 0.50 (silica gel, PE:EA = 20:1); **<sup>1</sup>H NMR** (400 MHz, CDCl<sub>3</sub>): δ = 8.31–8.27 (m, 1H), 7.93–7.89 (m, 1H), 7.66–7.63 (m, 2H), 7.55–7.50 (m, 2H), 7.49–7.43 (m, 3H), 7.39 (s, 1H), 7.37 (d, *J* = 5.6 Hz, 1H), 7.10 (d, *J* = 5.6 Hz, 1H), 6.89 (s, 1H); **<sup>13</sup>C{<sup>1</sup>H} NMR** (101 MHz, CDCl<sub>3</sub>): 139.7 (s, 1C), 138.6 (s, 1C), 136.8 (s, 1C), 133.7 (s, 1C), 130.0 (s, 1C), 129.8 (s, 1C), 128.8 (d, 2C), 128.8 (d, 2C), 128.0 (d, 1C), 123.7 (d, 1C), 123.3 (s, 1C), 122.6 (d, 1C), 120.7 (d, 1C), 120.7 (d, 1C), 115.3 (d, 1C), 115.2 (d, 1C), 112.7 (d, 1C), 94.7 (d, 1C); **HR-MS** (EI+): *m/z* calculated for [C<sub>20</sub>H<sub>13</sub>NS]<sup>+</sup>, [M]<sup>+</sup>: 299.07632, found: 299.07651; **IR** (ATR): ν [cm<sup>-1</sup>] = 3057, 2919, 2850, 1614, 1594, 1567, 1510, 1494, 1469, 1443, 1422, 1366, 1320, 1259, 1221, 1103, 1016, 920, 864, 800, 769, 735, 703, 678, 657, 643; **UV-Vis** (DCM): λ<sub>max</sub> [nm] = 281, 299, 302, 345, 361, 396, 412, 436; **fluorescence** (DCM): λ<sub>ex</sub> [nm] = 410, λ<sub>max</sub> [nm] = 471, 499, 530; **quantum yield** (DCM): Φ = 37%.

### 5-Butylindolo[1,2-*a*]quinoline (2h)

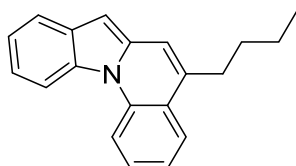

**1h** (49.1 mg, 180 μmol) and JohnPhosAu(MeCN)SbF<sub>6</sub> (3.47 mg, 4.49 μmol) in *o*-dichlorobenzene (17 mL) were used and treated according to GP5 (silica gel, PE). The product was obtained as a yellow oil (44.7 mg, 163 μmol, 91%).

**R<sub>f</sub>:** 0.70 (silica gel, PE:EA = 20:1); **<sup>1</sup>H NMR** (301 MHz, CDCl<sub>3</sub>): δ = 8.60 (dd, *J* = 8.5 Hz, *J* = 0.8 Hz, 1H), 8.47–8.41 (m, 1H), 7.86–7.81 (m, 2H), 7.63–7.58 (m, 1H), 7.41–7.33 (m, 3H), 7.19 (s, 1H), 6.70 (s, 1H), 2.87 (t, *J* = 7.6 Hz, 2H), 1.76 (quint, *J* = 7.6 Hz, 2H), 1.51 (sext, *J* = 7.6 Hz, 2H), 1.01 (t, *J* = 7.3 Hz, 3H); **<sup>13</sup>C{<sup>1</sup>H} NMR** (101 MHz, CDCl<sub>3</sub>): 137.2 (s, 1C), 136.5 (s, 1C), 134.0 (s, 1C), 133.0 (s, 1C), 130.7 (s, 1C), 128.3 (d, 1C), 125.1 (d, 1C), 124.2 (s, 1C), 122.7 (d, 1C), 121.9 (d, 1C), 121.3 (d, 1C), 121.0 (d, 1C), 117.8 (d, 1C), 115.8 (d, 1C), 114.4 (d, 1C), 95.9 (d, 1C), 32.3 (t, 1C), 31.4 (t, 1C), 22.9 (t, 1C), 14.1 (q, 1C); **HR-MS** (DART+): *m/z* calculated for [C<sub>20</sub>H<sub>20</sub>N]<sup>+</sup>, [M+H]<sup>+</sup>: 274.1590, found: 274.1592; **IR** (ATR): ν [cm<sup>-1</sup>] = 3060, 2956, 2930, 2870, 2234, 1597, 1532, 1501, 1452, 1378, 1367, 1331, 1316, 1241, 1202, 1145, 1076, 1026, 1012, 929, 789, 759, 748, 738, 698, 645, 633, 609; **UV-Vis** (DCM): λ<sub>max</sub> [nm] = 281, 296, 339, 360, 379, 397, 418; **fluorescence** (DCM): λ<sub>ex</sub> [nm] = 410, λ<sub>max</sub> [nm] = 443, 468, 497; **quantum yield** (DCM): Φ = 52%.

### 5-(4-Methoxyphenyl)indolo[1,2-a]quinoline (2i)

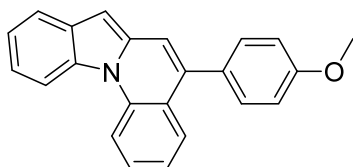

**1i** (48.3 mg, 149  $\mu\text{mol}$ ) and JohnPhosAu(MeCN)SbF<sub>6</sub> (2.88 mg, 3.73  $\mu\text{mol}$ ) in *o*-dichlorobenzene (15 mL) were used and treated according to GP5 (silica gel, PE:EA = 50:1). The product was obtained as a yellow solid (35.9 mg, 111  $\mu\text{mol}$ , 74%).

**Mp:** 186 °C; **R<sub>f</sub>:** 0.27 (silica gel, PE:EA = 20:1); **<sup>1</sup>H NMR** (700 MHz, CD<sub>2</sub>Cl<sub>2</sub>):  $\delta$  = 8.65 (d, *J* = 8.2 Hz, 1H), 8.49 (d, *J* = 8.1 Hz, 1H), 7.86 (d, *J* = 7.5 Hz, 1H), 7.72 (dd, *J* = 8.0 Hz, *J* = 1.5 Hz, 1H), 7.65–7.63 (m, 1H), 7.47–7.45 (m, 2H), 7.44–7.42 (m, 1H), 7.40–7.38 (m, 1H), 7.29–7.27 (m, 2H), 7.06–7.04 (m, 2H), 6.82 (s, 1H), 3.89 (s, 3H); **<sup>13</sup>C{<sup>1</sup>H} NMR** (126 MHz, CD<sub>2</sub>Cl<sub>2</sub>): 159.8 (s, 1C), 137.4 (s, 1C), 136.5 (s, 1C), 135.6 (s, 1C), 133.2 (s, 1C), 131.6 (s, 1C), 131.0 (d, 2C), 131.0 (s, 1C), 129.0 (d, 1C), 128.0 (d, 1C), 124.5 (s, 1C), 123.0 (d, 1C), 122.3 (d, 1C), 121.9 (d, 1C), 121.3 (d, 1C), 119.5 (d, 1C), 116.0 (d, 1C), 114.6 (d, 1C), 114.3 (d, 2C), 97.2 (d, 1C), 55.7 (q, 1C); **HR-MS** (DART+): *m/z* calculated for [C<sub>23</sub>H<sub>18</sub>NO]<sup>+</sup>, [M+H]<sup>+</sup>: 324.1383, found: 324.1383; **IR** (ATR):  $\nu$  [cm<sup>-1</sup>] = 3068, 2921, 2850, 1654, 1646, 1636, 1602, 1560, 1541, 1508, 1447, 1382, 1346, 1284, 1252, 1206, 1178, 1130, 1105, 1064, 1036, 960, 876, 834, 802, 750, 701, 669, 615; **UV-Vis** (DCM):  $\lambda_{\text{max}}$  [nm] = 256, 292, 341, 362, 386, 403, 425; **fluorescence** (DCM):  $\lambda_{\text{ex}}$  [nm] = 405,  $\lambda_{\text{max}}$  [nm] = 453, 474, 505.

### 5-(4-(Trifluoromethyl)phenyl)indolo[1,2-a]quinoline (2j)

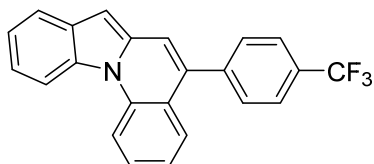

**1j** (58.9 mg, 163  $\mu\text{mol}$ ) and JohnPhosAu(MeCN)SbF<sub>6</sub> (3.15 mg, 4.07  $\mu\text{mol}$ ) in *o*-dichlorobenzene (15 mL) were used and treated according to GP5 (silica gel, PE:EA = 100:1). The product was obtained as a yellow solid (47.6 mg, 132  $\mu\text{mol}$ , 81%).

**Mp:** 131 °C; **R<sub>f</sub>:** 0.58 (silica gel, PE:EA = 20:1); **<sup>1</sup>H{<sup>19</sup>F} NMR** (301 MHz, CD<sub>2</sub>Cl<sub>2</sub>):  $\delta$  = 8.67 (d, *J* = 8.0 Hz, 1H), 8.51 (d, *J* = 8.5 Hz, 1H), 8.90–8.87 (m, 1H), 7.81–7.77 (m, 2H), 7.70–7.64 (m, 3H), 7.60 (dd, *J* = 8.0 Hz, *J* = 1.5 Hz, 1H), 7.49–7.38 (m, 2H), 7.34 (s, 1H), 7.32–7.27 (m, 1H), 6.88 (s, 1H); **<sup>13</sup>C{<sup>1</sup>H,<sup>19</sup>F} NMR** (126 MHz, CD<sub>2</sub>Cl<sub>2</sub>): 143.4 (s, 1C), 137.3 (s, 1C), 136.0 (s, 1C), 134.4 (s, 1C), 133.3 (s, 1C), 130.9 (s, 1C), 130.4 (d, 2C), 130.0 (s, 1C), 129.4 (d, 1C), 127.5 (d, 1C), 125.8 (d, 2C), 124.8 (s, 1C), 123.7 (s, 1C), 123.2 (d, 1C), 122.4 (d, 1C), 122.4 (d, 1C), 121.6 (d, 1C), 120.4 (d, 1C), 116.2 (d, 1C), 114.7 (d, 1C), 98.2 (d, 1C); **<sup>19</sup>F{<sup>1</sup>H} NMR** (283 MHz, CD<sub>2</sub>Cl<sub>2</sub>): -62.8 (3F); **HR-MS** (EI+): *m/z* calculated for [C<sub>23</sub>H<sub>14</sub>F<sub>3</sub>N]<sup>+</sup>, [M]<sup>+</sup>: 361.10729, found: 361.10720; **IR** (ATR):  $\nu$  [cm<sup>-1</sup>] = 2920, 2851, 1616, 1602, 1562, 1446, 1409, 1383, 1324, 1284, 1260, 1167, 1128, 1108, 1067, 1020, 960, 880, 846, 803, 751, 725, 669, 620; **UV-Vis** (DCM):  $\lambda_{\text{max}}$  [nm] = 283, 294, 353, 359, 387, 404, 426; **fluorescence** (DCM):  $\lambda_{\text{ex}}$  [nm] = 420,  $\lambda_{\text{max}}$  [nm] = 454, 474, 520; **quantum yield** (DCM):  $\Phi$  = 85%.



### 5-(2-Fluorophenyl)indolo[1,2-a]quinoline (2k)

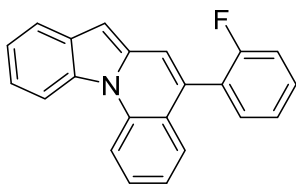

**1k** (93.0 mg, 299  $\mu\text{mol}$ ) and JohnPhosAu(MeCN)SbF<sub>6</sub> (5.77 mg, 7.47  $\mu\text{mol}$ ) in *o*-dichlorobenzene (30 mL) were used and treated according to GP5 (silica gel, PE:DCM = 100:1). The product was obtained as a yellow solid (79.8 mg, 256  $\mu\text{mol}$ , 86%).

**Mp:** 103–105 °C; **R<sub>f</sub>:** 0.50 (silica gel, PE:EA = 20:1); **<sup>1</sup>H{<sup>19</sup>F} NMR** (301 MHz, CD<sub>2</sub>Cl<sub>2</sub>):  $\delta$  = 8.66 (dd,  $J$  = 8.5 Hz,  $J$  = 0.7 Hz, 1H), 8.53–8.50 (m, 1H), 7.90–7.87 (m, 1H), 7.68–7.63 (m, 1H), 7.52–7.24 (m, 9H), 6.88 (s, 1H); **<sup>13</sup>C{<sup>1</sup>H,<sup>19</sup>F} NMR** (126 MHz, CD<sub>2</sub>Cl<sub>2</sub>): 160.6 (s, 1C), 137.1 (s, 1C), 136.0 (s, 1C), 133.4 (s, 1C), 132.3 (d, 1C), 130.8 (s, 1C), 130.5 (d, 1C), 130.0 (s, 1C), 129.2 (d, 1C), 127.6 (d, 1C), 126.8 (s, 1C), 124.9 (d, 1C), 123.9 (s, 1C), 123.2 (d, 1C), 122.4 (d, 1C), 122.3 (d, 1C), 121.6 (d, 1C), 121.1 (d, 1C), 116.1 (d, 1C), 116.0 (d, 1C), 114.7 (d, 1C), 98.0 (d, 1C); **<sup>19</sup>F{<sup>1</sup>H} NMR** (283 MHz, CD<sub>2</sub>Cl<sub>2</sub>): -113.7 (1F); **HR-MS** (EI<sup>+</sup>):  $m/z$  calculated for [C<sub>22</sub>H<sub>14</sub>FN]<sup>+</sup>, [M]<sup>+</sup>: 311.11048, found: 311.11144; **IR** (ATR):  $\nu$  [cm<sup>-1</sup>] = 3068, 2918, 2850, 1602, 1561, 1542, 1489, 1449, 1384, 1335, 1283, 1253, 1215, 1155, 1097, 1063, 1023, 961, 881, 811, 752, 669, 633; **UV-Vis** (DCM):  $\lambda_{\text{max}}$  [nm] = 284, 290, 339, 357, 384, 402, 423; **fluorescence** (DCM):  $\lambda_{\text{ex}}$  [nm] = 337,  $\lambda_{\text{max}}$  [nm] = 451, 473, 503.

### 5-(2-Bromophenyl)indolo[1,2-a]quinoline (2l)

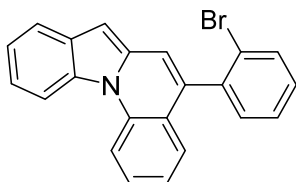

**1l** (136 mg, 365  $\mu\text{mol}$ ) and JohnPhosAu(MeCN)SbF<sub>6</sub> (7.05 mg, 9.13  $\mu\text{mol}$ ) in *o*-dichlorobenzene (45 mL) were used and treated according to GP5 (silica gel, PE:EA = 100:1). The product was obtained as a yellow solid (126 mg, 338  $\mu\text{mol}$ , 92%).

**Mp:** 104–107 °C; **R<sub>f</sub>:** 0.50 (silica gel, PE:EA = 20:1); **<sup>1</sup>H NMR** (301 MHz, CDCl<sub>3</sub>):  $\delta$  = 8.65 (d,  $J$  = 8.4 Hz, 1H), 8.51 (d,  $J$  = 8.3 Hz, 1H), 7.90–7.87 (m, 1H), 7.74 (dd,  $J$  = 8.0 Hz,  $J$  = 0.6 Hz, 1H), 7.65–7.59 (m, 1H), 7.49–7.40 (m, 4H), 7.38–7.31 (m, 1H), 7.27–7.23 (m, 3H), 6.86 (s, 1H); **<sup>13</sup>C{<sup>1</sup>H} NMR** (101 MHz, CDCl<sub>3</sub>): 139.9 (s, 1C), 136.9 (s, 1C), 135.7 (s, 1C), 134.7 (s, 1C), 133.3 (s, 1C), 133.1 (d, 1C), 132.0 (d, 1C), 130.6 (s, 1C), 129.7 (d, 1C), 128.8 (d, 1C), 127.7 (d, 1C), 127.7 (d, 1C), 124.5 (s, 1C), 123.7 (s, 1C), 122.9 (d, 1C), 122.2 (d, 1C), 122.1 (d, 1C), 121.4 (d, 1C), 120.3 (d, 1C), 115.8 (d, 1C), 114.5 (d, 1C), 97.9 (d, 1C); **HR-MS** (EI<sup>+</sup>):  $m/z$  calculated for [C<sub>22</sub>H<sub>14</sub><sup>79</sup>BrN]<sup>+</sup>, [M]<sup>+</sup>: 371.03041, found: 371.03133; **IR** (ATR):  $\nu$  [cm<sup>-1</sup>] = 3054, 2961, 2920, 2850, 1656, 1604, 1561, 1467, 1445, 1382, 1333, 1283, 1261, 1201, 1099, 1027, 960, 878, 806, 750, 733, 694, 663, 633, 613; **UV-Vis** (DCM):  $\lambda_{\text{max}}$  [nm] = 282, 291, 339, 355, 383, 402, 424; **fluorescence** (DCM):  $\lambda_{\text{ex}}$  [nm] = 400,  $\lambda_{\text{max}}$  [nm] = 446, 470, 499.

### 5-(Thiophen-2-yl)indolo[1,2-a]quinoline (2m)

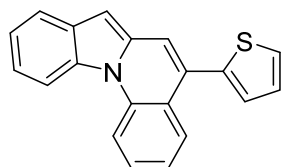

**1m** (89.8 mg, 300  $\mu\text{mol}$ ) and JohnPhosAu(MeCN)SbF<sub>6</sub> (5.79 mg, 7.50  $\mu\text{mol}$ ) in *o*-dichlorobenzene (30 mL) were used and treated according to GP5 (silica gel, PE:EA = 200:1). The product was obtained as a yellow solid (71.9 mg, 240  $\mu\text{mol}$ , 80%).

**Mp:** 83 °C; **R<sub>f</sub>:** 0.25 (silica gel, PE:EA = 100:1); **<sup>1</sup>H NMR** (600 MHz, CDCl<sub>3</sub>):  $\delta$  = 8.63 (d,  $J$  = 8.3 Hz, 1H), 8.48 (d,  $J$  = 8.3 Hz, 1H), 8.04 (dd,  $J$  = 8.0 Hz,  $J$  = 1.3 Hz, 1H), 7.88 (d,  $J$  = 7.5 Hz, 1H), 7.66–7.63 (m, 1H), 7.46 (s, 1H), 7.46–7.43 (m, 2H), 7.41 (t,  $J$  = 7.1 Hz, 1H), 7.32 (t,  $J$  = 7.6 Hz, 1H), 7.29 (dd,  $J$  = 3.4 Hz,  $J$  = 0.9 Hz, 1H), 7.20 (dd,  $J$  = 5.1 Hz,  $J$  = 3.5 Hz, 1H), 6.85 (s, 1H); **<sup>13</sup>C{<sup>1</sup>H} NMR** (151 MHz, CDCl<sub>3</sub>): 140.3 (s, 1C), 137.0 (s, 1C), 135.6 (s, 1C), 133.1 (s, 1C), 130.6 (s, 1C), 129.0 (d, 1C), 127.9 (s, 1C), 127.7 (d, 1C), 127.5 (d, 1C), 127.4 (d, 1C), 125.8 (d, 1C), 123.7 (s, 1C), 122.9 (d, 1C), 122.2 (d, 1C), 122.1 (d, 1C), 121.4 (d, 1C), 121.1 (d, 1C), 115.8 (d, 1C), 114.5 (d, 1C), 98.1 (d, 1C); **HR-MS** (EI+):  $m/z$  calculated for [C<sub>20</sub>H<sub>13</sub>NS]<sup>+</sup>, [M]<sup>+</sup>: 299.07632, found: 299.07636; **IR** (ATR):  $\nu$  [cm<sup>-1</sup>] = 3069, 2920, 2850, 1650, 1601, 1562, 1447, 1382, 1347, 1326, 1284, 1253, 1240, 1207, 1147, 1130, 1104, 1065, 1042, 1023, 950, 876, 856, 826, 750, 702, 668, 633; **UV-Vis** (DCM):  $\lambda_{\text{max}}$  [nm] = 258, 298, 332, 344, 363, 392, 406, 427; **fluorescence** (DCM):  $\lambda_{\text{ex}}$  [nm] = 420,  $\lambda_{\text{max}}$  [nm] = 478, 505.

### 5-(Pyridin-3-yl)indolo[1,2-a]quinoline (2n)

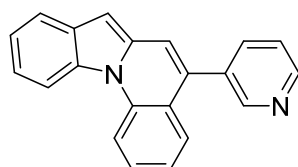

**1n** (28.4 mg, 96.5  $\mu\text{mol}$ ) and JohnPhosAu(MeCN)SbF<sub>6</sub> (1.86 mg, 2.41  $\mu\text{mol}$ ) in *o*-dichlorobenzene (10 mL) were used and treated according to GP5. After stirring at 170 °C for 4 h, TLC did not show full conversion. JohnPhosAu(MeCN)SbF<sub>6</sub> (5.59 mg, 7.24  $\mu\text{mol}$ ) was added and the solution was stirred at 180 °C for 16 h and again JohnPhosAu(MeCN)SbF<sub>6</sub> (7.45 mg, 9.65  $\mu\text{mol}$ ) was added and the solution was stirred at 180 °C for 24 h until full conversion was achieved. The solvent was removed under reduced pressure and the residue was purified by flash column chromatography (silica gel, PE:EA = 5:1 to 1:1). The product was obtained as a yellow solid (16.4 mg, 55.7  $\mu\text{mol}$ , 58%).

**Mp:** 131–133 °C; **R<sub>f</sub>:** 0.40 (silica gel, PE:EA = 1:1); **<sup>1</sup>H NMR** (600 MHz, CDCl<sub>3</sub>):  $\delta$  = 8.80–8.79 (m, 1H), 8.71 (dd,  $J$  = 4.9 Hz,  $J$  = 1.6 Hz, 1H), 8.66 (d,  $J$  = 8.3 Hz, 1H), 8.50 (d,  $J$  = 8.3 Hz, 1H), 7.89 (d,  $J$  = 7.6 Hz, 1H), 7.85 (dt,  $J$  = 7.7 Hz,  $J$  = 2.0 Hz, 1H), 7.67–7.64 (m, 1H), 7.58 (dd,  $J$  = 8.0 Hz,  $J$  = 1.4 Hz, 1H), 7.47–7.44 (m, 2H), 7.43–7.40 (m, 1H), 7.32 (s, 1H), 7.30–7.27 (m, 1H), 6.87 (s, 1H); **<sup>13</sup>C{<sup>1</sup>H} NMR** (151 MHz, CDCl<sub>3</sub>): 150.3 (d, 1C), 149.2 (d, 1C), 137.2 (d, 1C), 137.1 (s, 1C), 135.6 (s, 1C), 135.1 (s, 1C), 133.1 (s, 1C), 131.7 (s, 1C), 130.6 (s, 1C), 129.2 (d, 1C), 127.1 (d, 1C), 123.6 (s, 1C), 123.4 (d, 1C), 123.0 (d, 1C), 122.3 (d, 1C), 122.3 (d, 1C), 121.5 (d, 1C), 120.6 (d, 1C), 116.0 (d,

1C), 114.5 (d, 1C), 98.2 (d, 1C); **HR-MS** (EI+):  $m/z$  calculated for  $[C_{21}H_{14}N_2]^+$ ,  $[M]^+$ : 294.11515, found: 294.11437; **IR** (ATR):  $\nu$  [ $cm^{-1}$ ] = 3054, 2923, 2851, 1603, 1562, 1471, 1445, 1414, 1382, 1335, 1284, 1253, 1203, 1153, 1133, 1064, 1025, 961, 880, 812, 751, 717, 670, 633; **UV-Vis** (DCM):  $\lambda_{max}$  [nm] = 256, 284, 292, 340, 358, 386, 404, 425; **fluorescence** (DCM):  $\lambda_{ex}$  [nm] = 340,  $\lambda_{max}$  [nm] = 458, 476, 510; **quantum yield** (DCM):  $\Phi$  = 60%.

### 7-(2,6-Dimethylphenyl)-5-phenylindolo[1,2-a]quinoline (2o)

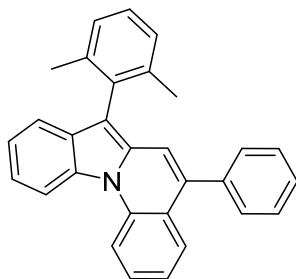

**1o** (25.0 mg, 63.9  $\mu$ mol) and JohnPhosAu(MeCN)SbF<sub>6</sub> (1.21 mg, 1.57  $\mu$ mol) in *o*-dichlorobenzene (6 mL) were used and treated according to GP5 (silica gel, PE:DCM = 10:1). The product was obtained as a yellow solid (23.5 mg, 59.0  $\mu$ mol, 94%).

**Mp**: 166–168 °C; **R<sub>f</sub>**: 0.55 (silica gel, PE:EA = 20:1); **<sup>1</sup>H NMR** (400 MHz, CDCl<sub>3</sub>):  $\delta$  = 8.77 (d,  $J$  = 8.4 Hz, 1H), 8.62 (d,  $J$  = 8.9 Hz, 1H), 7.76 (d,  $J$  = 8.0 Hz, 1H), 7.74–7.69 (m, 1H), 7.55–7.41 (m, 8H), 7.35–7.29 (m, 2H), 7.26–7.24 (m, 2H), 6.94 (s, 1H), 2.12 (s, 6H); **<sup>13</sup>C{<sup>1</sup>H} NMR** (101 MHz, CDCl<sub>3</sub>): 139.3 (s, 2C), 139.2 (s, 1C), 137.4 (s, 1C), 135.7 (s, 1C), 132.7 (s, 1C), 132.5 (s, 1C), 132.5 (s, 1C), 129.9 (s, 1C), 129.8 (d, 2C), 128.9 (d, 1C), 128.6 (d, 2C), 127.9 (d, 1C), 127.8 (d, 1C), 127.6 (d, 1C), 127.5 (d, 2C), 124.3 (s, 1C), 122.7 (d, 1C), 122.1 (d, 1C), 122.0 (d, 1C), 120.3 (d, 1C), 118.3 (d, 1C), 115.8 (d, 1C), 114.5 (d, 1C), 109.8 (s, 1C), 20.7 (q, 2C); **HR-MS** (EI+):  $m/z$  calculated for  $[C_{30}H_{23}N]^+$ ,  $[M]^+$ : 397.18250, found: 397.17991; **IR** (ATR):  $\nu$  [ $cm^{-1}$ ] = 3057, 2960, 2920, 2853, 1598, 1563, 1492, 1446, 1391, 1372, 1342, 1284, 1262, 1213, 1180, 1062, 1026, 963, 937, 881, 815, 772, 749, 703, 661, 612; **UV-Vis** (DCM):  $\lambda_{max}$  [nm] ( $\log \epsilon$ ) = 293 (4.53), 326 (3.77), 343 (3.76), 360 (3.79), 377 (3.85), 396 (3.99), 417 (4.04), 440 (3.82); **fluorescence** (DCM):  $\lambda_{ex}$  [nm] = 410,  $\lambda_{max}$  [nm] = 469, 500, 530; **quantum yield** (DCM):  $\Phi$  = 72%.

### 7-Methyl-5-phenylindolo[1,2-a]quinoline (2p)

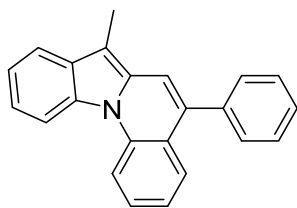

**1p** (76.4 mg, 249  $\mu\text{mol}$ ) and JohnPhosAu(MeCN)SbF<sub>6</sub> (4.80 mg, 6.20  $\mu\text{mol}$ ) in *o*-dichlorobenzene (20 mL) were used and treated according to GP5 (silica gel, PE to PE:EA = 20:1). The product was obtained as a yellow solid (69.2 mg, 225  $\mu\text{mol}$ , 91%).

**Mp:** 122 °C; **R<sub>f</sub>:** 0.50 (silica gel, PE:EA = 20:1); **<sup>1</sup>H NMR** (400 MHz, CDCl<sub>3</sub>):  $\delta$  = 8.59 (d,  $J$  = 8.1 Hz, 1H), 8.49–8.45 (m, 1H), 7.87–7.83 (m, 1H), 7.66 (dd,  $J$  = 8.0 Hz,  $J$  = 1.5 Hz, 1H), 7.61–7.57 (m, 1H), 7.57–7.50 (m, 4H), 7.48–7.41 (m, 3H), 7.30 (s, 1H), 7.24–7.20 (m, 1H), 2.55 (s, 3H); **<sup>13</sup>C{<sup>1</sup>H} NMR** (101 MHz, CDCl<sub>3</sub>): 139.7 (s, 1C), 137.4 (s, 1C), 134.4 (s, 1C), 132.8 (s, 1C), 132.4 (s, 1C), 130.9 (s, 1C), 129.8 (d, 2C), 128.7 (d, 1C), 128.6 (d, 2C), 127.8 (d, 1C), 127.6 (d, 1C), 124.1 (s, 1C), 122.4 (d, 1C), 121.9 (d, 1C), 121.5 (d, 1C), 119.2 (d, 1C), 117.9 (d, 1C), 115.5 (d, 1C), 114.2 (d, 1C), 104.6 (s, 1C), 8.3 (q, 1C); **HR-MS** (EI+):  $m/z$  calculated for [C<sub>23</sub>H<sub>17</sub>N]<sup>+</sup>, [M]<sup>+</sup>: 307.13555, found: 307.13614; **IR** (ATR):  $\nu$  [cm<sup>-1</sup>] = 3047, 2914, 2855, 1597, 1565, 1483, 1444, 1405, 1385, 1367, 1341, 1283, 1257, 1203, 1151, 1121, 1100, 1076, 1026, 935, 873, 833, 772, 747, 728, 704, 675, 632, 609; **UV-Vis** (DCM):  $\lambda_{\text{max}}$  [nm] (log $\epsilon$ ) = 258 (4.25), 295 (4.51), 329 (3.57), 346 (3.61), 363 (3.59), 384 (3.73), 402 (3.87), 421 (3.91), 443 (3.68); **fluorescence** (DCM):  $\lambda_{\text{ex}}$  [nm] = 420,  $\lambda_{\text{max}}$  [nm] = 474, 506, 540; **quantum yield** (DCM):  $\Phi$  = 77%.

### 7-Methylindolo[1,2-a]quinoline (2q)

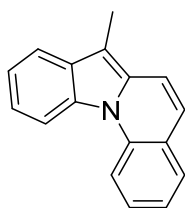

**1q** (81.4 mg, 352  $\mu\text{mol}$ ) and JohnPhosAu(MeCN)SbF<sub>6</sub> (6.79 mg, 8.80  $\mu\text{mol}$ ) in *o*-dichlorobenzene (30 mL) were used and treated according to GP5 (silica gel, PE). The product was obtained as a yellow solid (31.1 mg, 134  $\mu\text{mol}$ , 38%).

**Mp:** 58 °C; **R<sub>f</sub>:** 0.50 (silica gel, PE:EA = 50:1); **<sup>1</sup>H NMR** (301 MHz, CDCl<sub>3</sub>):  $\delta$  = 8.51 (d,  $J$  = 8.4 Hz, 1H), 8.46–8.41 (m, 1H), 7.86–7.81 (m, 1H), 7.63–7.53 (m, 2H), 7.47–7.38 (m, 2H), 7.34 (d,  $J$  = 9.5 Hz, 1H), 7.28 (td,  $J$  = 7.5 Hz,  $J$  = 0.9 Hz, 1H), 7.06 (d,  $J$  = 9.5 Hz, 1H), 2.54 (s, 3H); **<sup>13</sup>C{<sup>1</sup>H} NMR** (101 MHz, CDCl<sub>3</sub>): 137.3 (s, 1C), 133.1 (s, 1C), 132.5 (s, 1C), 130.6 (s, 1C), 128.8 (d, 1C), 128.6 (d, 1C), 124.5 (s, 1C), 122.6 (d, 1C), 122.6 (d, 1C), 121.9 (d, 1C), 121.4 (d, 1C), 119.2 (d, 1C), 117.8 (d, 1C), 115.2 (d, 1C), 114.2 (d, 1C), 104.2 (s, 1C), 8.3 (q, 1C); **HR-MS** (EI+):  $m/z$  calculated for [C<sub>17</sub>H<sub>13</sub>N]<sup>+</sup>, [M]<sup>+</sup>: 231.10425, found: 231.10411; **IR** (ATR):  $\nu$  [cm<sup>-1</sup>] = 3046, 2916, 2854, 1606, 1567, 1486, 1445, 1420, 1387, 1366, 1354, 1324, 1277, 1257, 1205, 1134, 1096, 1019, 932, 789, 750, 732, 665, 628; **UV-Vis**

(DCM):  $\lambda_{\text{max}}$  [nm] = 254, 283, 297, 324, 342, 373, 392, 411, 434; **fluorescence** (DCM):  $\lambda_{\text{ex}}$  [nm] = 390,  $\lambda_{\text{max}}$  [nm] = 459, 483, 516; **quantum yield** (DCM):  $\Phi = 75\%$ .

### Indolo[1,2-a]quinoline (2r)

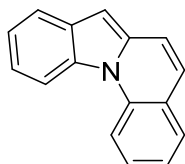

**1r-H** (68.2 mg, 314  $\mu\text{mol}$ ) and JohnPhosAu(MeCN)SbF<sub>6</sub> (6.06 mg, 7.85  $\mu\text{mol}$ ) in *o*-dichlorobenzene (125 mL) were used and treated according to GP5 (silica gel, PE:EA = 100:1). The product was obtained as a yellow solid (27.9 mg, 128  $\mu\text{mol}$ , 45%).

**R<sub>f</sub>**: 0.75 (silica gel, PE:EA = 10:1); **<sup>1</sup>H NMR** (301 MHz, CDCl<sub>3</sub>):  $\delta = 8.58$  (d,  $J = 8.4$  Hz, 1H), 8.48–8.45 (m, 1H), 7.88–7.85 (m, 1H), 7.67–7.58 (m, 2H), 7.43–7.30 (m, 4H), 7.13 (d,  $J = 9.5$  Hz, 1H), 7.01 (s, 1H); **HR-MS** (EI<sup>+</sup>):  $m/z$  calculated for [C<sub>16</sub>H<sub>11</sub>N]<sup>+</sup>, [M]<sup>+</sup>: 217.08860, found: 217.08635; **UV-Vis** (DCM):  $\lambda_{\text{max}}$  [nm] = 280, 294, 341, 364, 377, 394, 417; **fluorescence** (DCM):  $\lambda_{\text{ex}}$  [nm] = 395,  $\lambda_{\text{max}}$  [nm] = 433, 460, 490, 525; **quantum yield** (DCM):  $\Phi = 74\%$ .

The spectroscopic data correspond to those previously reported in the literature.<sup>[15]</sup>

### 7-(1-(1-Phenyl-1H-indol-2-yl)vinyl)indolo[1,2-a]quinoline (4)

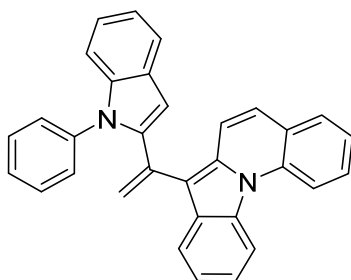

**1r-H** (50.0 mg, 230  $\mu\text{mol}$ ) and JohnPhosAu(MeCN)SbF<sub>6</sub> (4.44 mg, 5.75  $\mu\text{mol}$ ) in *o*-dichlorobenzene (15 mL) were used and treated according to GP5 (silica gel, PE:EA = 100:1). The product was obtained as a yellow solid (31.3 mg, 144  $\mu\text{mol}$ , 63%).

**Mp**: 161 °C; **R<sub>f</sub>**: 0.45 (silica gel, PE:EA = 10:1); **<sup>1</sup>H NMR** (600 MHz, CD<sub>2</sub>Cl<sub>2</sub>):  $\delta = 8.45$  (d,  $J = 8.4$  Hz, 1H), 8.28 (d,  $J = 8.5$  Hz, 1H), 7.70 (d,  $J = 7.9$  Hz, 1H), 7.62–7.58 (m, 2H), 7.48 (d,  $J = 8.0$  Hz, 1H), 7.34–7.31 (m, 3H), 7.22 (t,  $J = 7.5$  Hz, 1H), 7.16 (td,  $J = 7.0$  Hz,  $J = 1.0$  Hz, 1H), 7.13–7.02 (m, 4H), 6.96 (s, 1H), 6.86–6.83 (m, 3H), 6.76–6.73 (m, 1H), 5.93 (d,  $J = 2.0$  Hz, 1H), 5.60 (d,  $J = 1.9$  Hz, 1H); **<sup>13</sup>C{<sup>1</sup>H} NMR** (151 MHz, CD<sub>2</sub>Cl<sub>2</sub>): 142.7 (s, 1C), 139.2 (s, 1C), 138.3 (s, 1C), 136.7 (s, 1C), 134.4 (s, 1C), 133.9 (s, 1C), 132.8 (s, 1C), 129.5 (s, 1C), 129.1 (d, 2C), 128.3 (d, 2C), 126.7 (d, 2C), 126.6 (d, 1C), 124.7 (s, 1C), 124.5 (d, 1C), 123.3 (d, 1C), 122.7 (d, 1C), 122.3 (d, 1C), 122.2 (d, 1C), 121.0 (d, 1C), 120.8 (d, 1C), 120.5 (d, 1C), 118.5 (d, 1C), 118.0 (t, 1C), 115.8 (d, 1C), 114.1 (d, 1C), 110.7 (d,

1C), 109.8 (s, 1C), 104.3 (d, 1C), 77.9 (s, 1C); **HR-MS** (EI+):  $m/z$  calculated for  $[C_{32}H_{22}N_2]^+$ ,  $[M]^+$ : 434.17775, found: 434.17835; **IR** (ATR):  $\nu$  [ $cm^{-1}$ ] = 3046, 2956, 2922, 2851, 1913, 1877, 1597, 1559, 1496, 1443, 1392, 1347, 1318, 1281, 1248, 1216, 1199, 1139, 1128, 1067, 1015, 961, 925, 887, 841, 796, 764, 749, 725, 696, 643, 618; **UV-Vis** (DCM):  $\lambda_{max}$  [nm] ( $\log \epsilon$ ) = 289 (4.54), 404 (3.89), 422 (3.88), 447 (3.61); **fluorescence** (DCM):  $\lambda_{ex}$  [nm] = 400,  $\lambda_{max}$  [nm] = 473, 506, 539.

### 5-Phenyl-7-(1-(1-phenyl-1H-indol-2-yl)vinyl)-3-(trifluoromethyl)indolo[1,2-a]quinoline (5)

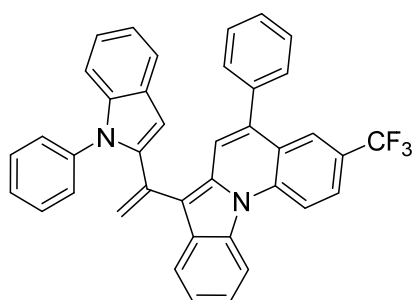

A Schlenk flask containing **1r-H** (5.40 mg, 24.9  $\mu$ mol), **2d** (13.5 mg, 37.3  $\mu$ mol) and JohnPhosAu(MeCN)SbF<sub>6</sub> (960  $\mu$ g, 1.24  $\mu$ mol) was evacuated and refilled with argon three times. Degassed *o*-dichlorobenzene (5 mL) was added and the resulting solution was stirred at 170°C for 4 h. The solvent was removed under reduced pressure and the residue was purified by preparative thin layer chromatography (silica gel, PE:DCM = 5:1). The product was obtained as a yellow solid (11.8 mg, 20.4  $\mu$ mol, 82%).

**Mp**: 200 °C; **R<sub>f</sub>**: 0.40 (silica gel, PE:EA = 20:1); **<sup>1</sup>H{<sup>19</sup>F} NMR** (500 MHz, CDCl<sub>3</sub>):  $\delta$  = 8.54 (d,  $J$  = 8.8 Hz, 1H), 8.24 (d,  $J$  = 8.5 Hz, 1H), 7.89 (s, 1H), 7.80 (d,  $J$  = 8.8 Hz, 1H), 7.71 (d,  $J$  = 7.9 Hz, 1H), 7.49–7.46 (m, 3H), 7.40 (d,  $J$  = 8.0 Hz, 1H), 7.38–7.32 (m, 3H), 7.23 (t,  $J$  = 7.5 Hz, 1H), 7.20–7.17 (m, 1H), 7.15–7.12 (m, 1H), 7.11 (s, 1H), 7.06 (d,  $J$  = 8.1 Hz, 1H), 6.96 (s, 1H), 6.83–6.80 (m, 2H), 6.77–6.74 (m, 3H), 5.92 (d,  $J$  = 1.9 Hz, 1H), 5.57 (d,  $J$  = 1.9 Hz, 1H); **<sup>13</sup>C{<sup>1</sup>H,<sup>19</sup>F} NMR** (126 MHz, CDCl<sub>3</sub>): 142.1 (s, 1C), 139.0 (s, 1C), 138.6 (s, 1C), 138.3 (s, 1C), 138.0 (s, 1C), 135.1 (s, 1C), 133.5 (s, 1C), 133.4 (s, 1C), 132.5 (s, 1C), 129.8 (s, 1C), 129.4 (d, 2C), 129.0 (d, 2C), 128.3 (d, 1C), 128.1 (d, 2C), 127.9 (s, 1C), 126.6 (d, 2C), 126.5 (d, 1C), 125.3 (d, 1C), 124.7 (s, 1C), 124.5 (d, 1C), 124.3 (s, 1C), 124.1 (s, 1C), 122.9 (d, 1C), 122.8 (d, 1C), 122.6 (d, 1C), 120.9 (d, 1C), 120.9 (d, 1C), 120.6 (d, 1C), 119.8 (d, 1C), 118.0 (t, 1C), 116.0 (d, 1C), 113.7 (d, 1C), 111.3 (s, 1C), 110.5 (d, 1C), 104.4 (d, 1C); **<sup>19</sup>F{<sup>1</sup>H} NMR** (471 MHz, CDCl<sub>3</sub>): -61.8 (3F); **HR-MS** (EI+):  $m/z$  calculated for  $[C_{39}H_{25}F_3N_2]^+$ ,  $[M]^+$ : 578.19643, found: 578.19675; **IR** (ATR):  $\nu$  [ $cm^{-1}$ ] = 3055, 2955, 2921, 2851, 1728, 1599, 1493, 1452, 1390, 1354, 1317, 1265, 1241, 1213, 1170, 1154, 1109, 1090, 1063, 1029, 1016, 980, 958, 927, 901, 891, 833, 795, 773, 759, 738, 700, 676, 651, 610.

### 5,5'-Diphenyl-7,7'-biindolo[1,2-a]quinoline (6)

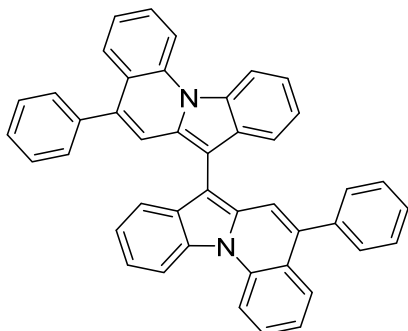

To a solution of **2a** (96.4 mg, 329  $\mu\text{mol}$ ) in DCM (5 mL) *N*-iodosuccinimide (81.3 mg, 361  $\mu\text{mol}$ ) was added and the reaction mixture was stirred at rt for 16 h. A saturated aqueous solution of  $\text{Na}_2\text{SO}_3$  (5 mL) and water (10 mL) was added and the mixture was extracted with DCM. The combined organic layers were washed with water and brine and dried over  $\text{Na}_2\text{SO}_4$ . The solvent was removed under reduced pressure and the residue was purified by flash column chromatography (silica gel, PE:DCM = 10:1 to 1:1). The product was obtained as a yellow solid (67.3 mg, 115  $\mu\text{mol}$ , 70%).

**Mp**: decomposition  $>129$   $^\circ\text{C}$ ; **R<sub>f</sub>**: 0.41 (silica gel, PE:EA = 20:1); **<sup>1</sup>H NMR** (700 MHz,  $\text{CD}_2\text{Cl}_2$ ):  $\delta$  = 8.75 (d,  $J$  = 8.3 Hz, 2H), 8.62 (d,  $J$  = 8.7 Hz, 2H), 7.79 (d,  $J$  = 7.1 Hz, 2H), 7.71–7.68 (m, 4H), 7.53–7.51 (m, 2H), 7.43–7.40 (m, 10H), 7.39–7.36 (m, 2H), 7.30 (t,  $J$  = 7.5 Hz, 2H), 7.22 (s, 2H); **<sup>13</sup>C{<sup>1</sup>H} NMR** (176 MHz,  $\text{CD}_2\text{Cl}_2$ ): 139.4 (s, 2C), 137.5 (s, 2C), 135.9 (s, 2C), 134.0 (s, 2C), 133.4 (s, 2C), 130.8 (s, 2C), 129.9 (d, 4C), 129.2 (d, 2C), 128.7 (d, 4C), 128.1 (d, 2C), 128.0 (d, 2C), 124.6 (s, 2C), 123.1 (d, 2C), 122.5 (d, 2C), 122.3 (d, 2C), 121.1 (d, 2C), 119.4 (d, 2C), 116.1 (d, 2C), 114.8 (d, 2C), 102.8 (s, 2C); **HR-MS** (EI<sup>+</sup>):  $m/z$  calculated for  $[\text{C}_{44}\text{H}_{28}\text{N}_2]^+$ ,  $[\text{M}]^+$ : 584.22470, found: 584.22556; **IR** (ATR):  $\nu$  [ $\text{cm}^{-1}$ ] = 3054, 2923, 2851, 1659, 1597, 1556, 1492, 1443, 1384, 1340, 1283, 1250, 1200, 1153, 1115, 1066, 1026, 926, 903, 877, 807, 770, 744, 699, 633, 613; **UV-Vis** (DCM):  $\lambda_{\text{max}}$  [nm] ( $\log \epsilon$ ) = 303 (4.70), 346 (3.90), 436 (4.18); **fluorescence** (DCM):  $\lambda_{\text{ex}}$  [nm] = 435,  $\lambda_{\text{max}}$  [nm] = 543; **quantum yield** (DCM):  $\Phi$  = 38%.

### 1,4-Bis(1-phenyl-1*H*-indol-2-yl)buta-1,3-diyne (7)

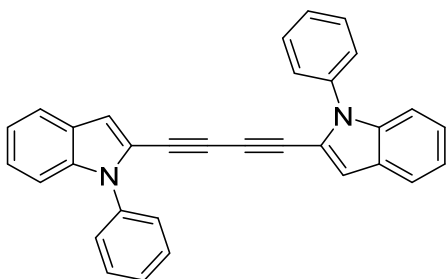

According to a modified procedure by Panda *et al.*,<sup>[16]</sup> a mixture of **1r-H** (90.0 mg, 414  $\mu\text{mol}$ ),  $\text{Pd}(\text{PPh}_3)_2\text{Cl}_2$  (7.27 mg, 10.4  $\mu\text{mol}$ ) and  $\text{CuI}$  (3.94 mg, 20.7  $\mu\text{mol}$ ) in THF (5 mL) and  $\text{Et}_3\text{N}$  (5 mL) was stirred under air at rt for 5 h. The solvents were removed under reduced pressure and the residue was

purified by flash column chromatography (silica gel, PE:EA = 20:1 to 10:1). The product was obtained as a pale yellow solid (65.3 mg, 151  $\mu\text{mol}$ , 73%).

**Mp:** 165 °C; **R<sub>f</sub>:** 0.40 (silica gel, PE:EA = 20:1); **<sup>1</sup>H NMR** (301 MHz, CDCl<sub>3</sub>):  $\delta$  = 7.63 (d, *J* = 7.8 Hz, 2H), 7.57–7.42 (m, 10H), 7.30–7.22 (m, 4H), 7.20–7.15 (m, 2H), 7.08 (s, 2H); **<sup>13</sup>C{<sup>1</sup>H} NMR** (101 MHz, CDCl<sub>3</sub>): 137.9 (s, 2C), 137.4 (s, 2C), 129.4 (d, 4C), 127.9 (d, 2C), 127.4 (s, 2C), 127.2 (d, 4C), 124.8 (d, 2C), 121.4 (d, 4C), 120.7 (s, 2C), 113.1 (d, 2C), 110.8 (d, 2C), 80.0 (s, 2C), 75.7 (s, 2C); **HR-MS** (EI+): *m/z* calculated for [C<sub>32</sub>H<sub>20</sub>N<sub>2</sub>]<sup>+</sup>, [M]<sup>+</sup>: 432.16210, found: 432.16134; **IR** (ATR):  $\nu$  [cm<sup>-1</sup>] = 3061, 2955, 2924, 2851, 2146, 1595, 1500, 1444, 1371, 1349, 1318, 1234, 1201, 1148, 1137, 1115, 1076, 1015, 931, 842, 795, 754, 743, 694, 637, 624, 607.

### 5,5'-Biindolo[1,2-*a*]quinoline (8)

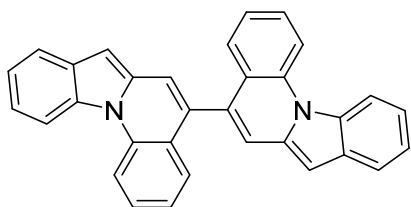

**7** (46.8 mg, 108  $\mu\text{mol}$ ) and JohnPhosAu(MeCN)SbF<sub>6</sub> (4.18 mg, 5.41  $\mu\text{mol}$ ) in *o*-dichlorobenzene (15 mL) were used and treated according to GP5 (silica gel, PE:DCM = 4:1). The product was obtained as a yellow solid (19.5 mg, 45.1  $\mu\text{mol}$ , 42%).

**Mp:** decomposition >295 °C; **R<sub>f</sub>:** 0.57 (silica gel, PE:EA = 10:1); **<sup>1</sup>H NMR** (400 MHz, CDCl<sub>3</sub>):  $\delta$  = 8.68 (d, *J* = 8.1 Hz, 2H), 8.55–8.53 (m, 2H), 7.92–7.90 (m, 2H), 7.64–7.60 (m, 2H), 7.50 (s, 2H), 7.48–7.41 (m, 6H), 7.19–7.15 (m, 2H), 6.88 (s, 2H); **<sup>13</sup>C{<sup>1</sup>H} NMR** (101 MHz, CDCl<sub>3</sub>): 136.9 (s, 2C), 135.9 (s, 2C), 133.3 (s, 2C), 132.6 (s, 2C), 130.6 (s, 2C), 129.0 (d, 2C), 128.2 (d, 2C), 124.4 (s, 2C), 123.0 (d, 2C), 122.3 (d, 2C), 122.2 (d, 2C), 121.5 (d, 2C), 120.9 (d, 2C), 115.8 (d, 2C), 114.5 (d, 2C), 97.9 (d, 2C); **HR-MS** (EI+): *m/z* calculated for [C<sub>32</sub>H<sub>20</sub>N<sub>2</sub>]<sup>+</sup>, [M]<sup>+</sup>: 432.16210, found: 432.16233; **IR** (ATR):  $\nu$  [cm<sup>-1</sup>] = 3062, 2955, 2922, 2851, 1599, 1560, 1443, 1376, 1341, 1282, 1252, 1203, 1135, 1062, 907, 876, 743, 667, 610; **UV-Vis** (DCM):  $\lambda_{\text{max}}$  [nm] = 283, 291, 299, 340, 363, 385, 403, 423; **fluorescence** (DCM):  $\lambda_{\text{ex}}$  [nm] = 405,  $\lambda_{\text{max}}$  [nm] = 471, 510; **quantum yield** (DCM):  $\Phi$  = 66%.



### 1,4-Bis((1-phenyl-1*H*-indol-2-yl)ethynyl)benzene (9)

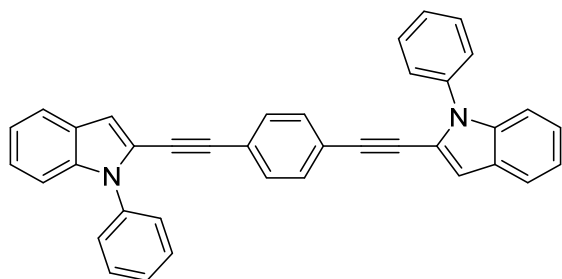

**1r-H** (196 mg, 909  $\mu\text{mol}$ ), 1,4-diiodobenzene (120 mg, 364  $\mu\text{mol}$ ),  $\text{Pd}(\text{PPh}_3)_2\text{Cl}_2$  (12.8 mg, 18.2  $\mu\text{mol}$ ) and  $\text{CuI}$  (6.93 mg, 36.4  $\mu\text{mol}$ ) in THF (5 mL) and  $\text{Et}_3\text{N}$  (5 mL) were used and treated according to GP4 (silica gel, PE:DCM = 100:1 to 5:1). The product was obtained as a pale yellow solid (104 mg, 205  $\mu\text{mol}$ , 56%).

**Mp**: 224  $^\circ\text{C}$ ; **R<sub>f</sub>**: 0.40 (silica gel, PE:EA = 20:1); **<sup>1</sup>H NMR** (400 MHz,  $\text{CD}_2\text{Cl}_2$ ):  $\delta$  = 7.67–7.65 (m, 2H), 7.62–7.57 (m, 8H), 7.52–7.47 (m, 2H), 7.33–7.31 (m, 2H), 7.26–7.22 (m, 6H), 7.19–7.15 (m, 2H), 7.03 (d,  $J$  = 0.7 Hz, 2H); **<sup>13</sup>C{<sup>1</sup>H} NMR** (101 MHz,  $\text{CD}_2\text{Cl}_2$ ): 138.1 (s, 2C), 138.0 (s, 2C), 131.4 (d, 4C), 129.6 (d, 4C), 128.2 (d, 2C), 128.0 (s, 2C), 127.7 (d, 4C), 124.3 (d, 2C), 123.0 (s, 2C), 122.0 (s, 2C), 121.4 (d, 2C), 121.4 (d, 2C), 110.9 (d, 2C), 110.1 (d, 2C), 95.3 (s, 2C), 84.2 (s, 2C); **HR-MS** (EI<sup>+</sup>):  $m/z$  calculated for  $[\text{C}_{38}\text{H}_{24}\text{N}_2]^+$ ,  $[\text{M}]^+$ : 508.19340, found: 508.19367; **IR** (ATR):  $\nu$  [ $\text{cm}^{-1}$ ] = 3054, 2218, 1595, 1551, 1498, 1477, 1449, 1410, 1374, 1355, 1335, 1318, 1215, 1152, 1130, 1103, 1077, 1019, 934, 830, 808, 796, 762, 729, 698, 638, 623, 606.

### 1,4-Bis(indolo[1,2-*a*]quinolin-5-yl)benzene (10)

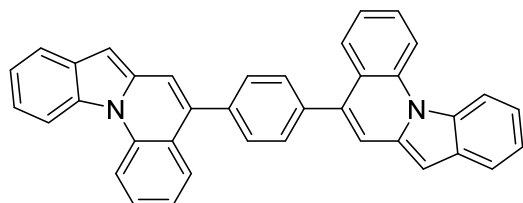

**9** (40.5 mg, 79.6  $\mu\text{mol}$ ) and  $\text{JohnPhosAu}(\text{MeCN})\text{SbF}_6$  (3.07 mg, 3.98  $\mu\text{mol}$ ) in *o*-dichlorobenzene (15 mL) were used and treated according to GP5 (silica gel, PE:DCM = 8:1 to 2:1). The product was obtained as a yellow solid. This compound showed high instability in solution and it could not be purified completely. A full characterization was not possible.

**Mp**: decomposition  $>190$   $^\circ\text{C}$ ; **R<sub>f</sub>**: 0.33 (silica gel, PE:EA = 20:1); **<sup>1</sup>H NMR** (301 MHz,  $\text{CDCl}_3$ ):  $\delta$  = 8.69 (d,  $J$  = 8.0 Hz, 2H), 8.54–8.51 (m, 2H), 7.91–7.88 (m, 2H), 7.84 (dd,  $J$  = 8.0 Hz,  $J$  = 1.5 Hz, 2H), 7.73–7.64 (m, 8H), 7.49–7.39 (m, 6H), 7.37–7.31 (m, 2H); **HR-MS** (EI<sup>+</sup>):  $m/z$  calculated for  $[\text{C}_{38}\text{H}_{24}\text{N}_2]^+$ ,  $[\text{M}]^+$ : 508.19340, found: 508.19096.

### 5-(2-(Phenylethynyl)phenyl)indolo[1,2-a]quinoline (11)

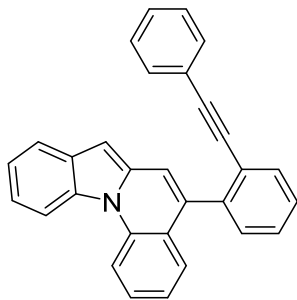

**11** (87.0 mg, 234  $\mu\text{mol}$ ), phenylacetylene (71.6 mg, 701  $\mu\text{mol}$ ),  $\text{Pd}(\text{PPh}_3)_4$  (13.5 mg, 11.7  $\mu\text{mol}$ ),  $\text{CuI}$  (4.45 mg, 23.4  $\mu\text{mol}$ ) and  $\text{Et}_3\text{N}$  (5 mL) were used and treated according to GP4 (90  $^\circ\text{C}$ , 2 d; silica gel, PE to PE:DCM = 5:1). The product was obtained as a yellow solid (49.0 mg, 125  $\mu\text{mol}$ , 53%).

**Mp:** 93–95  $^\circ\text{C}$ ; **R<sub>f</sub>:** 0.40 (silica gel, PE:EA = 20:1);  **$^1\text{H NMR}$**  (400 MHz,  $\text{CDCl}_3$ ):  $\delta$  = 8.70–8.67 (m, 1H), 8.55–8.53 (m, 1H), 7.90–7.88 (m, 1H), 7.73–7.71 (m, 1H), 7.65–7.60 (m, 1H), 7.54 (dd,  $J$  = 8.0 Hz,  $J$  = 1.5 Hz, 1H), 7.51–7.39 (m, 6H), 7.28–7.24 (m, 1H), 7.17–7.07 (m, 3H), 6.95–6.92 (m, 2H), 6.86 (s, 1H);  **$^{13}\text{C}\{^1\text{H}\}$  NMR** (101 MHz,  $\text{CDCl}_3$ ): 141.5 (s, 1C), 136.9 (s, 1C), 136.1 (s, 1C), 134.4 (s, 1C), 133.2 (s, 1C), 132.5 (d, 1C), 131.4 (d, 2C), 130.7 (s, 1C), 130.5 (d, 1C), 128.6 (d, 1C), 128.5 (d, 1C), 128.2 (d, 4C), 128.0 (d, 1C), 124.0 (s, 1C), 123.8 (s, 1C); 123.1 (s, 1C), 122.7 (d, 1C), 122.0 (d, 1C), 121.9 (d, 1C), 121.3 (d, 1C), 120.5 (d, 1C), 115.6 (d, 1C), 114.5 (d, 1C), 97.6 (d, 1C), 93.9 (s, 1C), 88.7 (s, 1C); **HR-MS** (EI<sup>+</sup>):  $m/z$  calculated for  $[\text{C}_{30}\text{H}_{19}\text{N}]^+$ ,  $[\text{M}]^+$ : 393.15120, found: 393.15211; **IR** (ATR):  $\nu$  [ $\text{cm}^{-1}$ ] = 3059, 2960, 2922, 2851, 1720, 1602, 1561, 1493, 1468, 1447, 1382, 1334, 1261, 1202, 1095, 1025, 961, 914, 873, 805, 756, 725, 691, 670, 632, 614.

### 1-Phenylbenzo[*k*]indolo[1,2-*f*]phenanthridine (12)

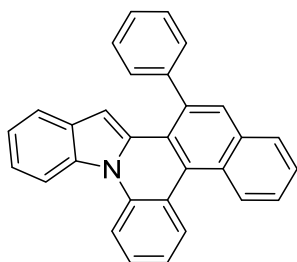

**12** (22.7 mg, 62.8  $\mu\text{mol}$ ) and  $\text{JohnPhosAu}(\text{MeCN})\text{SbF}_6$  (1.21 mg, 1.57  $\mu\text{mol}$ ) in *o*-dichlorobenzene (6 mL) were used and treated according to GP5 (silica gel, PE:DCM = 10:1). The product was obtained as a yellow solid (15.1 mg, 38.4  $\mu\text{mol}$ , 61%).

**Mp:** 212–214  $^\circ\text{C}$ ; **R<sub>f</sub>:** 0.60 (silica gel, PE:EA = 10:1);  **$^1\text{H NMR}$**  (600 MHz,  $\text{CDCl}_3$ ):  $\delta$  = 8.76 (d,  $J$  = 8.5 Hz, 1H), 8.57–8.55 (m, 1H), 8.50 (d,  $J$  = 8.1 Hz, 1H), 8.32 (d,  $J$  = 8.4 Hz, 1H), 7.91 (d,  $J$  = 7.8 Hz, 1H), 7.76 (s, 1H), 7.64–7.59 (m, 4H), 7.57–7.52 (m, 5H), 7.42 (t,  $J$  = 7.6 Hz, 1H), 7.35 (t,  $J$  = 7.3 Hz, 1H), 7.22 (t,  $J$  = 7.4 Hz, 1H), 5.88 (s, 1H);  **$^{13}\text{C}\{^1\text{H}\}$  NMR** (151 MHz,  $\text{CDCl}_3$ ): 142.9 (s, 1C), 137.2 (s, 1C), 135.6 (s, 1C), 135.0 (s, 1C), 133.3 (s, 1C), 132.6 (s, 1C), 130.5 (d, 1C), 130.3 (d, 1C), 130.0 (s, 1C), 130.0 (d, 2C), 129.0 (s, 1C), 128.9 (d, 2C), 128.7 (d, 1C), 128.5 (d, 1C), 128.0 (d, 1C), 127.4 (d,

1C), 126.6 (d, 1C), 126.5 (s, 1C), 126.4 (d, 1C), 124.5 (s, 1C), 123.6 (s, 1C), 123.1 (d, 1C), 122.4 (d, 1C), 121.7 (d, 1C), 121.4 (d, 1C), 117.2 (d, 1C), 113.5 (d, 1C), 101.1 (d, 1C); **HR-MS** (EI+):  $m/z$  calculated for  $[C_{30}H_{19}N]^+$ ,  $[M]^+$ : 393.15120, found: 393.15085; **IR** (ATR):  $\nu$  [ $cm^{-1}$ ] = 2955, 2923, 2852, 1660, 1633, 1590, 1556, 1531, 1493, 1456, 1417, 1361, 1332, 1260, 1209, 1152, 1091, 1030, 893, 801, 781, 751, 736, 702, 656, 625; **UV-Vis** (DCM):  $\lambda_{max}$  [nm] = 255, 293, 306, 321, 346, 381, 407; **fluorescence** (DCM):  $\lambda_{ex}$  [nm] = 410,  $\lambda_{max}$  [nm] = 487, 511; **quantum yield** (DCM):  $\Phi = 40\%$ .

**(Z)-5-Phenyl-7-(1-phenyl-2-(1-phenyl-1*H*-indol-2-yl)vinyl)indolo[1,2-*a*]quinoline (3a) + dimer 3c**

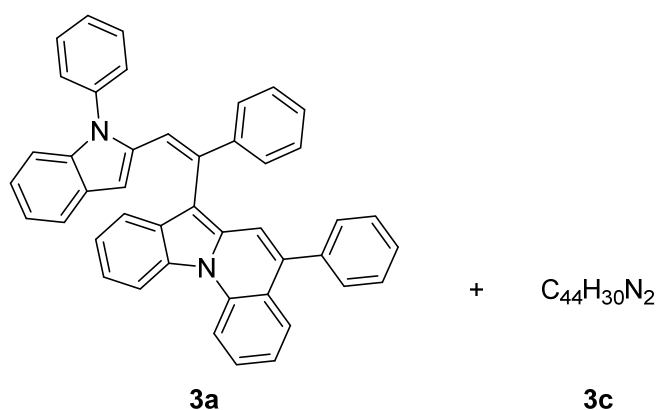

**1a** (114 mg, 389  $\mu$ mol) and IPrAuNTf<sub>2</sub> (16.8 mg, 19.4  $\mu$ mol) in *o*-dichlorobenzene (25 mL) were stirred at 140 °C for 90 min. The solvent was removed under reduced pressure and the residue was purified by flash column chromatography (PE:EA = 200:1 to 10:1) to yield a mixture of the **3a–d** (99.1 mg, 338  $\mu$ mol, 87%). Repeated preparative thin layer chromatography (silica gel, PE:DCM = 5:1, 10:1 and 20:1) was applied to yield a 5:1 mixture of **3a** and **3c**. Through vapour diffusion of MeOH into a saturated solution of this mixture in CHCl<sub>3</sub> single crystals were grown and the structure of **3a** was confirmed by single crystal X-ray analysis. <sup>1</sup>H NMR of the sampled crystals confirmed the right assignment of **3a** to the observed structure.

**3a:**

**R<sub>f</sub>**: 0.33 (silica gel, PE:EA = 20:1); **<sup>1</sup>H NMR** (400 MHz, CDCl<sub>3</sub>):  $\delta$  = 8.77 (d,  $J$  = 8.3 Hz, 1H), 8.57 (d,  $J$  = 8.6 Hz, 1H), 7.70–7.67 (m, 1H), 7.46–7.21 (m, 20H), 7.16–7.14 (m, 2H), 7.10 (d,  $J$  = 0.4 Hz, 1H), 7.04–7.03 (m, 2H), 6.99 (s, 1H), 6.07 (s, 1H); **<sup>13</sup>C{<sup>1</sup>H} NMR** (101 MHz, CDCl<sub>3</sub>): 142.9 (s, 1C), 139.1 (s, 1C), 138.2 (s, 1C), 138.0 (s, 1C), 137.7 (s, 1C), 137.2 (s, 1C), 135.9 (s, 1C), 134.5 (s, 1C), 133.4 (s, 1C), 133.3 (s, 1C), 129.7 (s, 1C), 129.7 (d, 2C), 129.4 (d, 2C), 128.9 (d, 1C), 128.4 (d, 4C), 128.4 (s, 1C), 128.1 (d, 2C), 127.8 (d, 1C), 127.8 (d, 1C), 127.8 (d, 1C), 127.6 (d, 1C), 127.3 (d, 2C), 124.2 (s, 1C), 122.9 (d, 1C), 122.3 (d, 1C), 122.2 (d, 2C), 121.1 (d, 1C), 120.7 (d, 1C), 120.4 (d, 1C), 119.4 (d, 1C), 118.9 (d, 1C), 115.9 (d, 1C), 114.5 (d, 1C), 110.2 (d, 1C), 108.8 (s, 1C), 104.0 (d, 1C); **HR-MS** (EI+):  $m/z$  calculated for  $[C_{44}H_{30}N_2]^+$ ,  $[M]^+$ : 586.24035, found: 586.23983.

**3c:**

**R<sub>f</sub>**: 0.33 (silica gel, PE:EA = 20:1); **<sup>1</sup>H NMR** (400 MHz, CDCl<sub>3</sub>):  $\delta$  = 8.62 (d,  $J$  = 8.2 Hz, 1H), 8.45 (d,  $J$  = 8.5 Hz, 1H), 7.71–7.69 (m, 1H), 7.63–7.59 (m, 1H), 7.68–7.00 (m, 21H), 6.98 (t,  $J$  = 2.6 Hz, 2H), 6.96 (d,  $J$  = 2.7 Hz, 1H), 6.74 (s, 1H), 6.26 (s, 1H); **<sup>13</sup>C{<sup>1</sup>H} NMR** (101 MHz, CDCl<sub>3</sub>): 141.5 (s, 1C),

139.2 (s, 1C), 138.0 (s, 1C), 137.9 (s, 1C), 137.8 (s, 1C), 137.1 (s, 1C), 137.0 (s, 1C), 136.0 (s, 1C), 134.5 (s, 1C), 132.9 (s, 1C), 130.2 (d, 2C), 129.7 (s, 1H) 129.6 (d, 2C), 129.5 (d, 2C), 128.9 (d, 1C), 128.8 (d, 2C), 128.6 (d, 2C), 128.6 (d, 2C), 128.4 (s, 1C), 128.0 (d, 1C), 127.9 (d, 1C), 127.8 (d, 1C), 127.6 (d, 1C), 124.3 (s, 1C), 123.1 (d, 1C), 122.2 (d, 1C), 122.2 (d, 2C), 121.1 (d, 1C), 120.6 (d, 1C), 120.5 (d, 1C), 119.0 (d, 1C), 118.1 (d, 1C), 116.1 (d, 1C), 114.2 (d, 1C), 113.3 (s, 1C), 110.3 (d, 1C), 103.4 (d, 1C); **HR-MS** (EI+): *m/z* calculated for [C<sub>44</sub>H<sub>30</sub>N<sub>2</sub>]<sup>+</sup>, [M]<sup>+</sup>: 586.24035, found: 586.23983.

### Dimer 3b + dimer 3d

**1a** (114 mg, 389 μmol) and IPrAuNTf<sub>2</sub> (16.8 mg, 19.4 μmol) in *o*-dichlorobenzene (25 mL) were stirred at 140 °C for 90 min. The solvent was removed under reduced pressure and the residue was purified by flash column chromatography (PE:EA = 200:1 to 10:1) to yield a mixture of **3a–d** (99.1 mg, 338 μmol, 87%). Repeated preparative thin layer chromatography (silica gel, PE:DCM = 5:1 and 10:1) was applied to yield a 7:3 and a 1:1 mixture of **3b** and **3d**, which allowed the assignment of NMR peaks by comparison.

#### **3b:**

**R<sub>f</sub>**: 0.35 (silica gel, PE:EA = 20:1); **<sup>1</sup>H NMR** (400 MHz, CDCl<sub>3</sub>): δ = 8.52 (d, *J* = 8.4 Hz, 1H), 8.29 (d, *J* = 8.6 Hz, 1H), 7.73 (d, *J* = 7.8 Hz, 1H), 7.64–7.58 (m, 2H), 7.39–7.03 (m, 18H), 6.98–6.95 (m, 1H), 6.69–6.59 (m, 6H); **<sup>13</sup>C{<sup>1</sup>H} NMR** (101 MHz, CDCl<sub>3</sub>): 144.6 (s, 1C), 139.4 (s, 1C), 139.2 (s, 1C), 138.0 (s, 1C), 138.0 (s, 1C), 136.6 (s, 1C), 135.7 (s, 1C), 133.1 (s, 1C), 132.9 (s, 1C), 130.4 (d, 1C), 129.8 (s, 1C), 129.6 (d, 2C), 129.1 (d, 2C), 128.6 (d, 1C), 128.5 (d, 2C), 128.3 (d, 2C), 127.9 (s, 1C), 127.8 (d, 2C), 127.8 (d, 1C), 127.5 (d, 1C), 126.9 (d, 1C), 126.5 (d, 2C), 126.0 (d, 1C), 125.9 (s, 1C), 123.7 (s, 1C), 122.7 (d, 1C), 122.3 (d, 1C), 122.2 (d, 1C), 121.9 (d, 1C), 121.2 (d, 1C), 120.7 (d, 1C), 120.4 (d, 1C), 119.3 (d, 1C), 115.8 (d, 1C), 113.9 (d, 1C), 110.4 (d, 1C), 107.4 (s, 1C), 104.4 (d, 1C); **HR-MS** (EI+): *m/z* calculated for [C<sub>44</sub>H<sub>30</sub>N<sub>2</sub>]<sup>+</sup>, [M]<sup>+</sup>: 586.24035, found: 586.24243.

#### **3d:**

**R<sub>f</sub>**: 0.35 (silica gel, PE:EA = 20:1); **<sup>1</sup>H NMR** (400 MHz, CDCl<sub>3</sub>): δ = 8.55 (d, *J* = 8.5 Hz, 1H), 8.35 (d, *J* = 8.6 Hz, 1H), 7.67–7.58 (m, 3H), 7.42–7.03 (m, 18H), 6.98–6.95 (m, 1H), 6.87–6.78 (m, 6H); **<sup>13</sup>C{<sup>1</sup>H} NMR** (101 MHz, CDCl<sub>3</sub>): 139.6 (s, 1C), 139.1 (s, 1C), 138.1 (s, 1C), 137.9 (s, 1C), 137.7 (s, 1C), 136.7 (s, 1C), 135.9 (s, 1C), 134.2 (s, 1C), 132.7 (s, 1C), 129.6 (s, 1C), 129.5 (d, 2C), 129.2 (d, 2C), 128.8 (d, 1C), 128.6 (d, 2C), 128.5 (s, 1C), 128.4 (d, 2C), 128.2 (d, 2C), 127.8 (d, 1C), 127.5 (d, 1C), 127.0 (d, 1C), 126.5 (d, 2C), 126.2 (d, 1C), 126.0 (s, 1C), 124.2 (s, 1C), 122.9 (d, 1C), 122.3 (d, 1C), 122.3 (d, 1C), 122.1 (d, 1C), 121.2 (d, 1C), 120.7 (d, 1C), 120.7 (d, 1C), 120.4 (d, 1C), 118.7 (d, 1C), 115.9 (d, 1C), 113.9 (d, 1C), 111.8 (s, 1C), 110.6 (d, 1C), 105.7 (d, 1C); **HR-MS** (EI+): *m/z* calculated for [C<sub>44</sub>H<sub>30</sub>N<sub>2</sub>]<sup>+</sup>, [M]<sup>+</sup>: 586.24035, found: 586.24243.

## 2 NMR Spectra

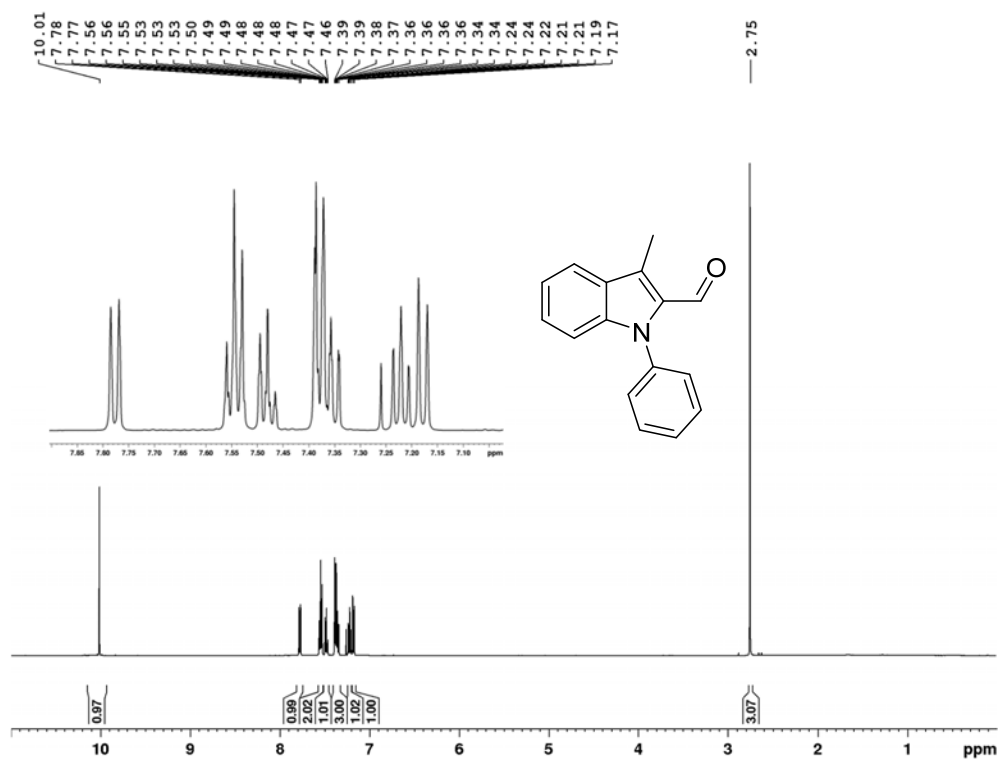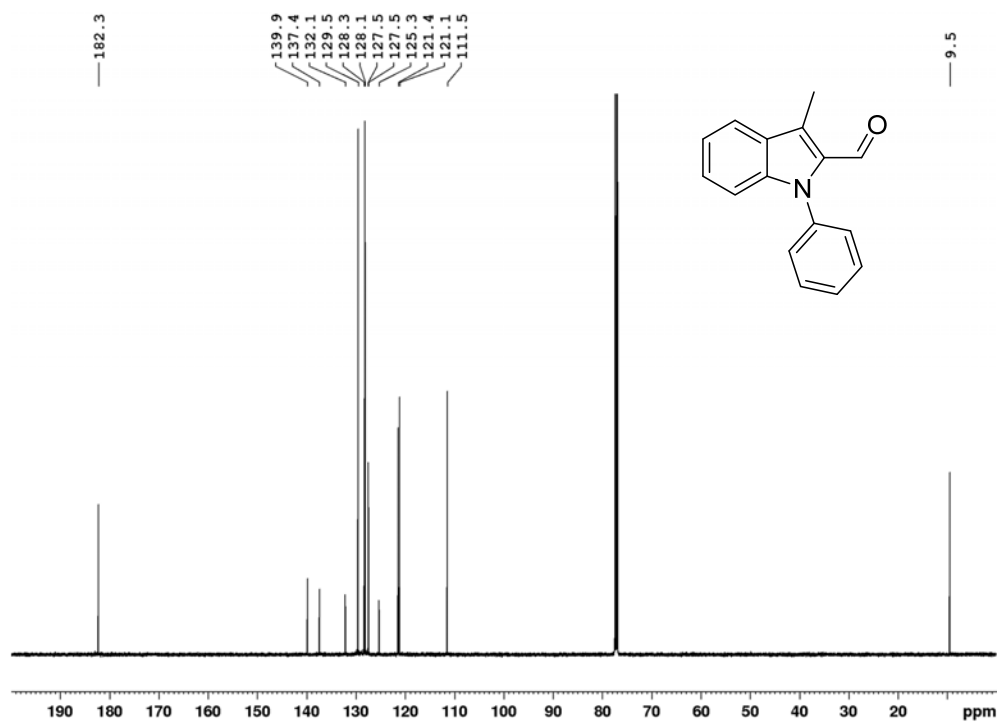

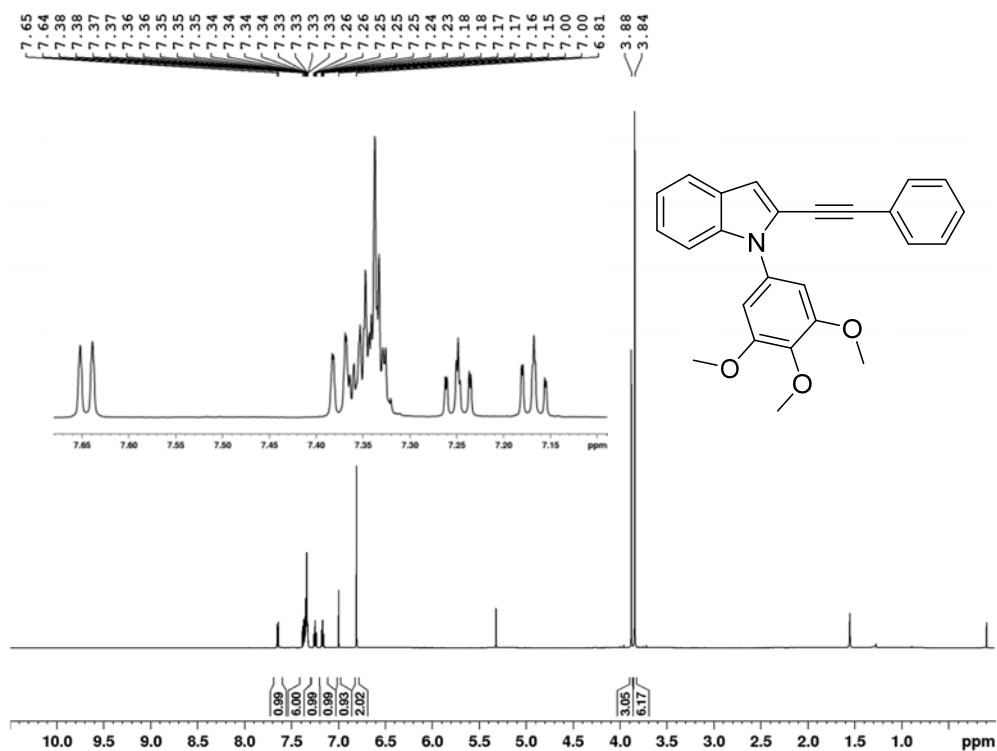

Figure S4. <sup>1</sup>H NMR spectrum (600 MHz, CD<sub>2</sub>Cl<sub>2</sub>) of **1c**.

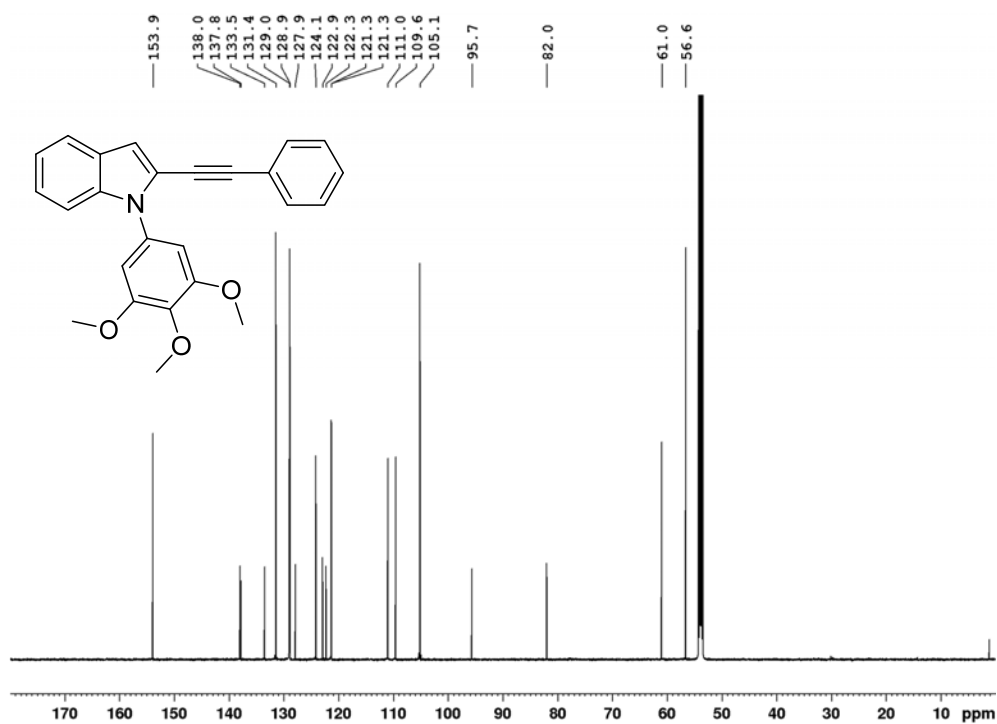

Figure S5. <sup>13</sup>C{<sup>1</sup>H} NMR spectrum (151 MHz, CD<sub>2</sub>Cl<sub>2</sub>) of **1c**.

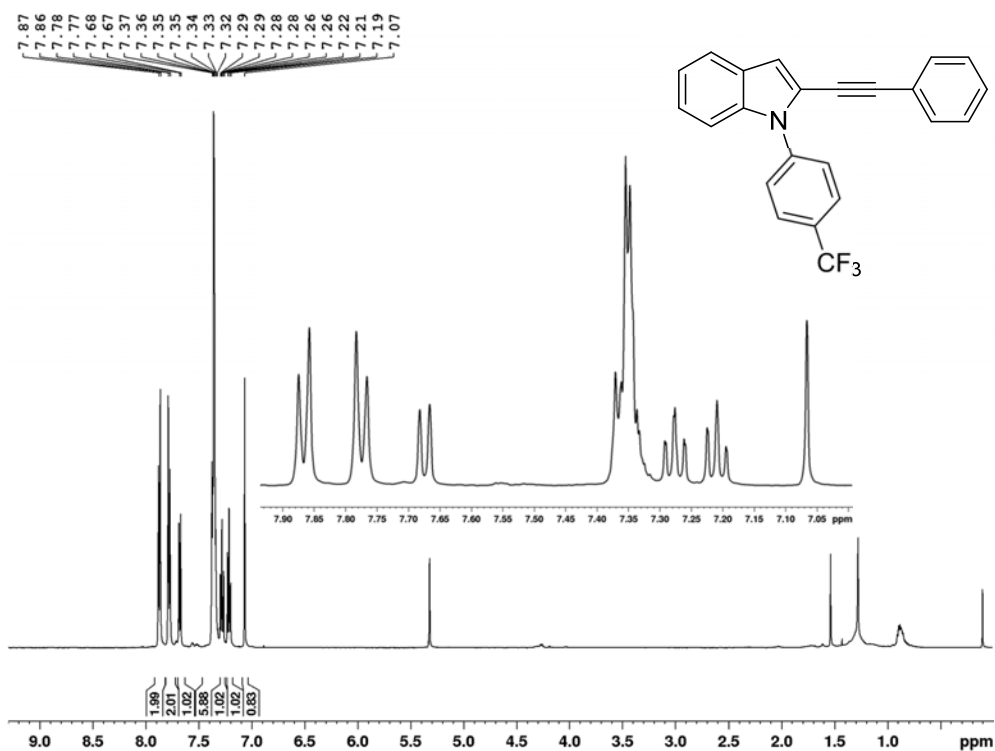

Figure S6.  $^1\text{H}$  NMR spectrum (500 MHz,  $\text{CD}_2\text{Cl}_2$ ) of **1d**.

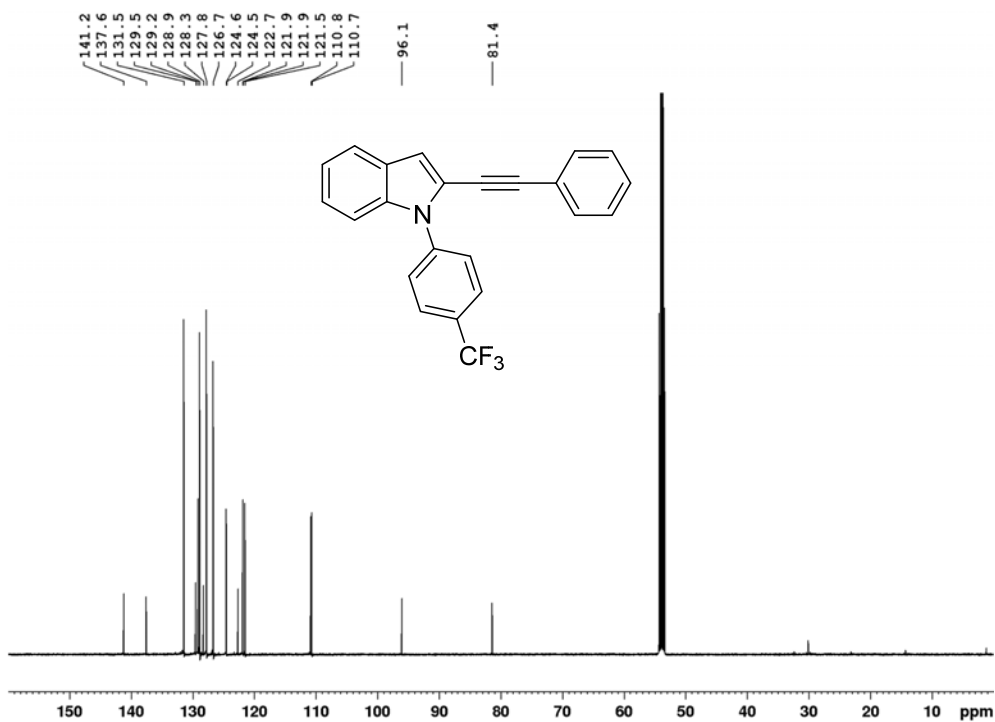

Figure S7.  $^{13}\text{C}\{^1\text{H}, ^{19}\text{F}\}$  NMR spectrum (126 MHz,  $\text{CD}_2\text{Cl}_2$ ) of **1d**.

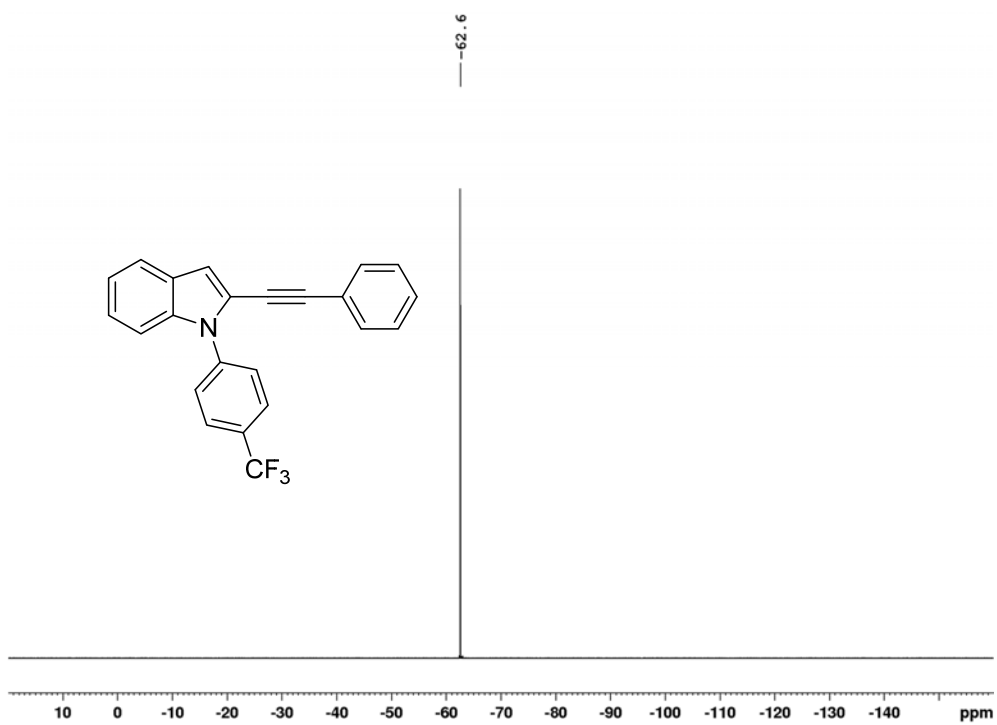

Figure S8.  $^{19}\text{F}\{^1\text{H}\}$  NMR spectrum (471 MHz,  $\text{CD}_2\text{Cl}_2$ ) of **1d**.

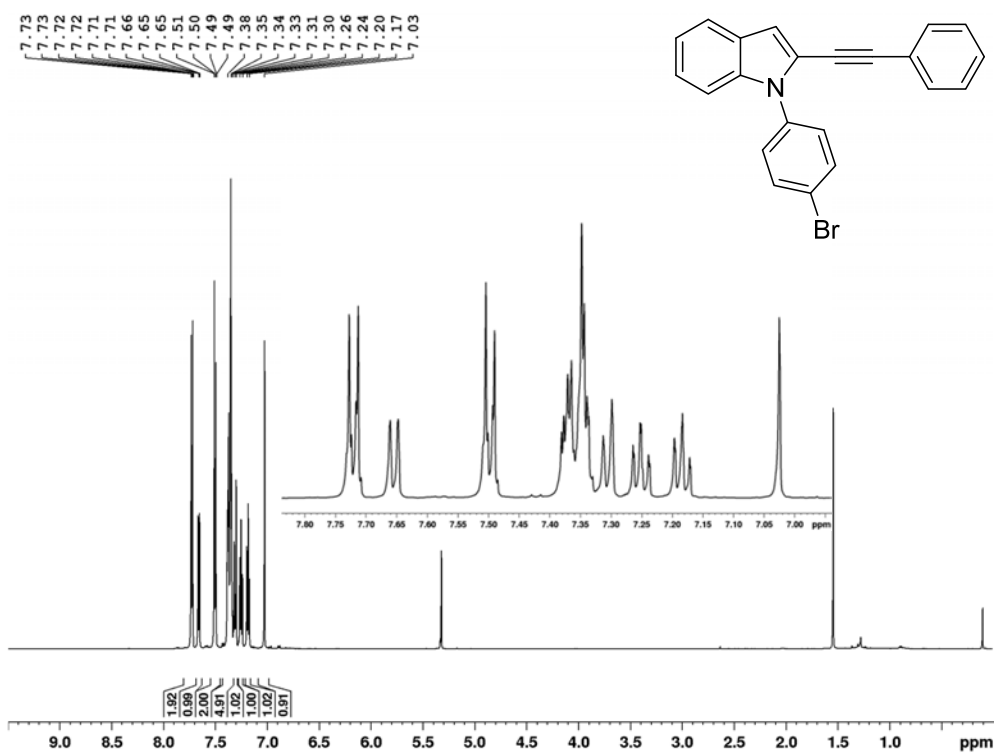

Figure S9.  $^1\text{H}$  NMR spectrum (600 MHz,  $\text{CD}_2\text{Cl}_2$ ) of **1e**.



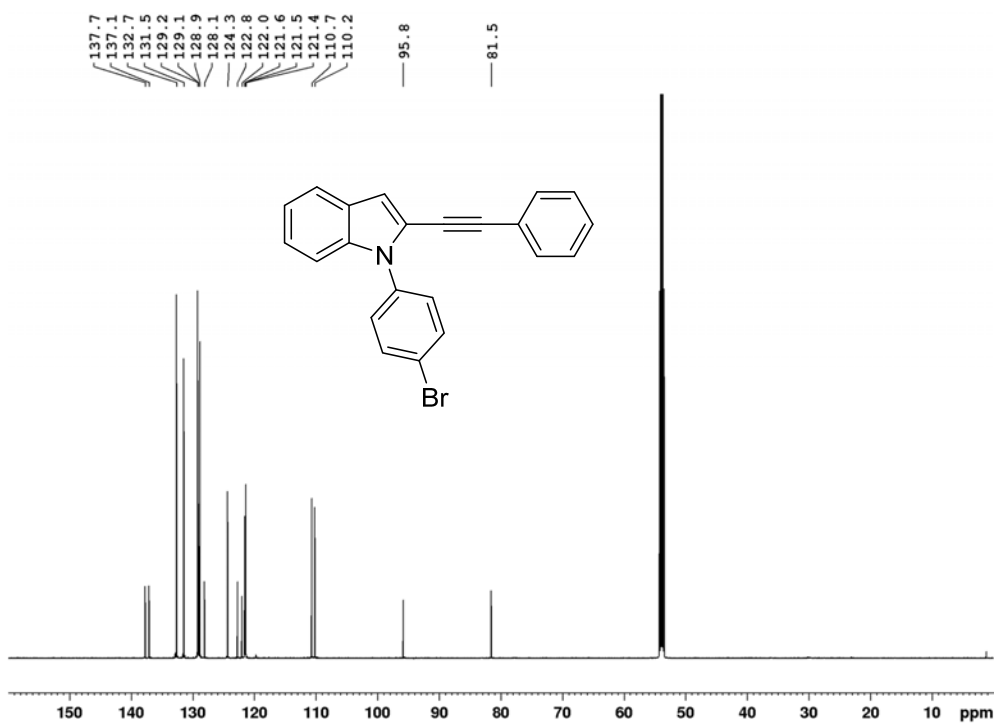

Figure S10. <sup>13</sup>C{<sup>1</sup>H} NMR spectrum (151 MHz, CD<sub>2</sub>Cl<sub>2</sub>) of 1e.

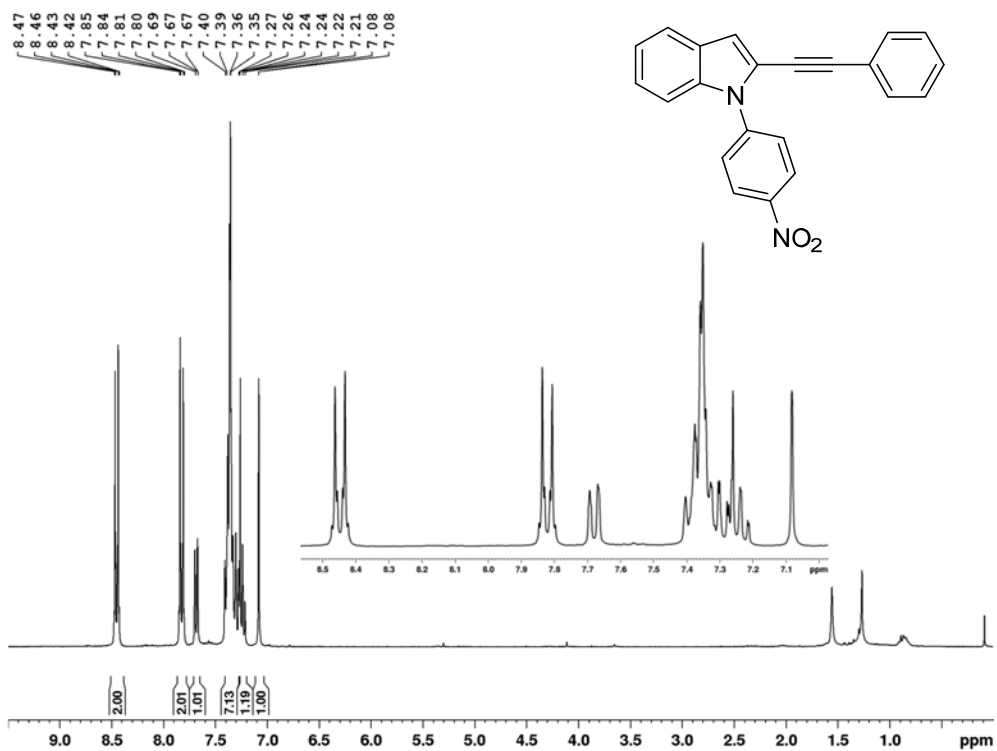

Figure S11. <sup>1</sup>H NMR spectrum (301 MHz, CDCl<sub>3</sub>) of 1f.

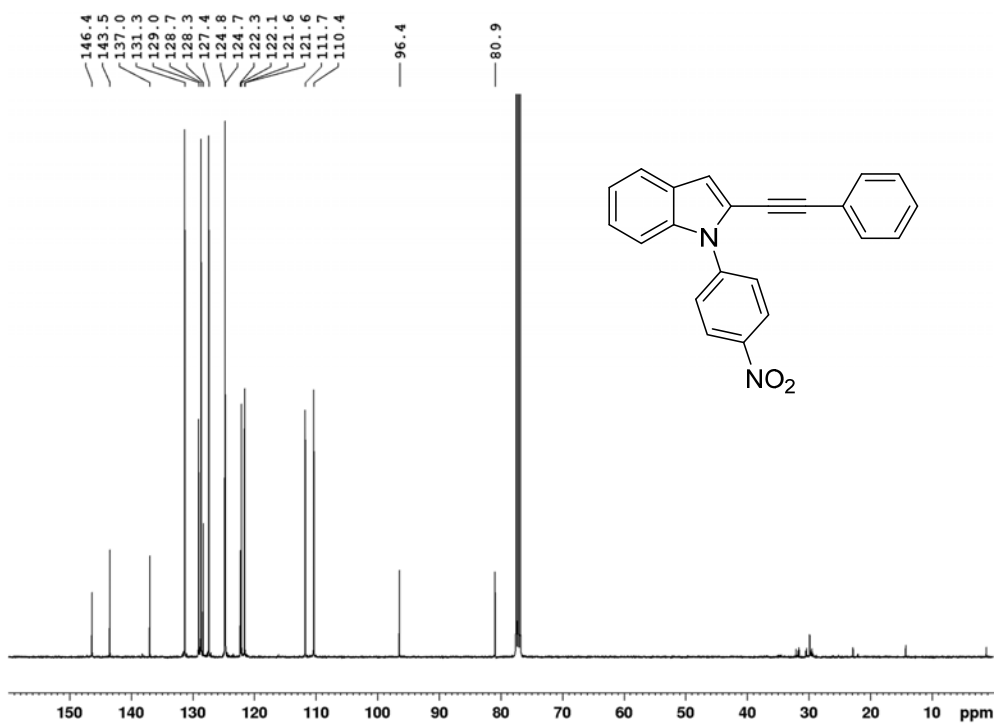

Figure S12.  $^{13}\text{C}\{^1\text{H}\}$  NMR spectrum (101 MHz,  $\text{CDCl}_3$ ) of 1f.

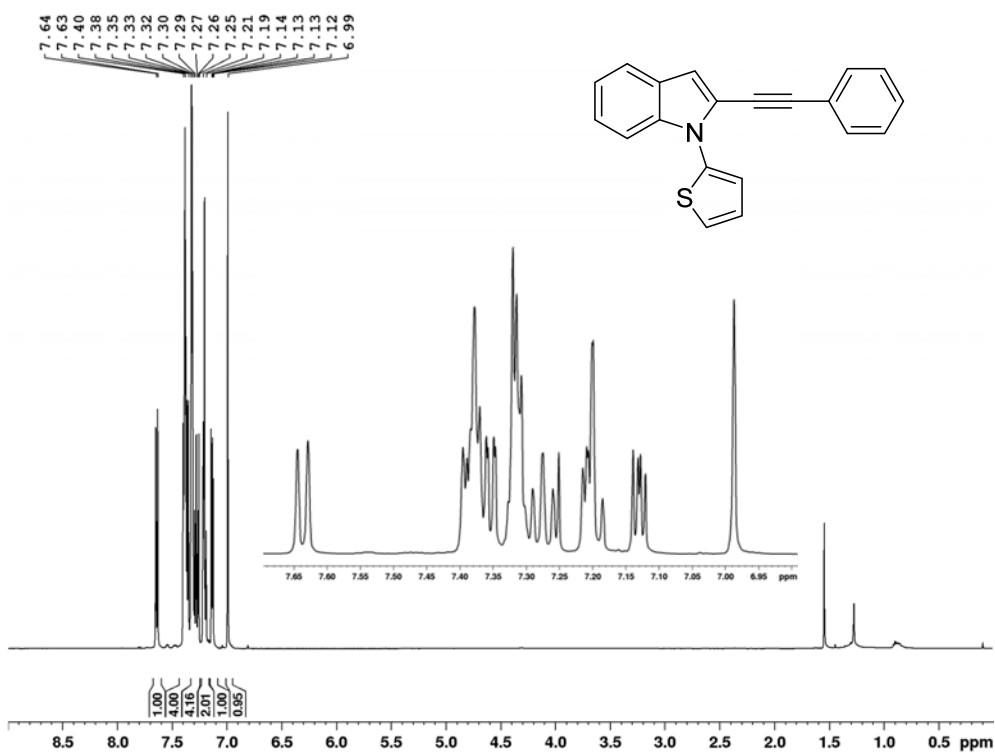

Figure S13.  $^1\text{H}$  NMR spectrum (500 MHz,  $\text{CDCl}_3$ ) of 1g.

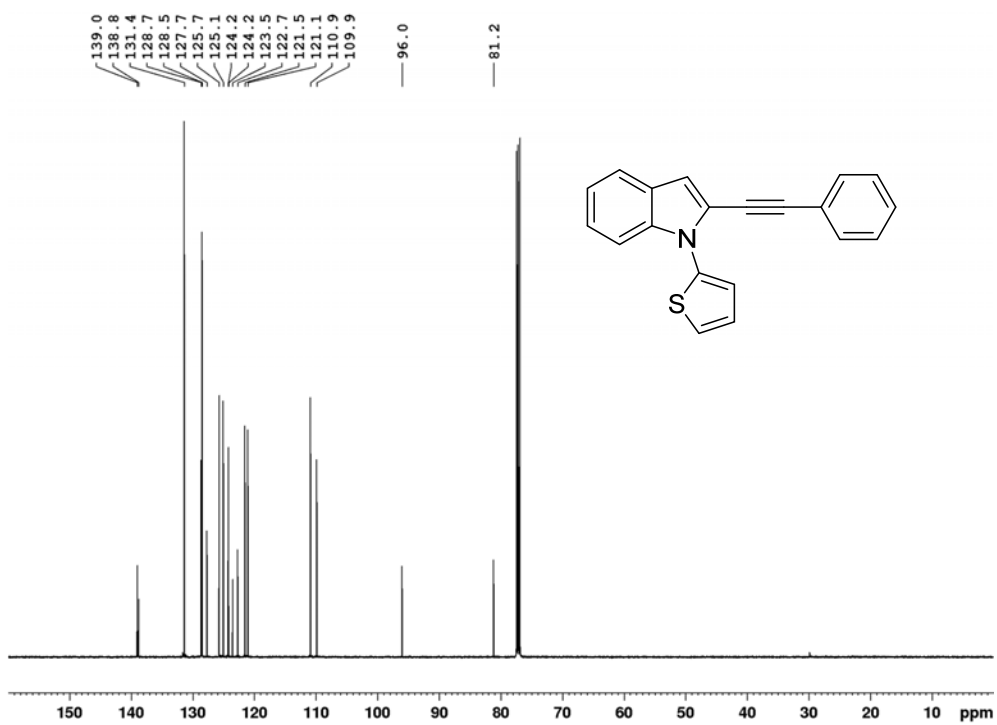

Figure S14.  $^{13}\text{C}\{^1\text{H}\}$  NMR spectrum (126 MHz,  $\text{CDCl}_3$ ) of **1g**.

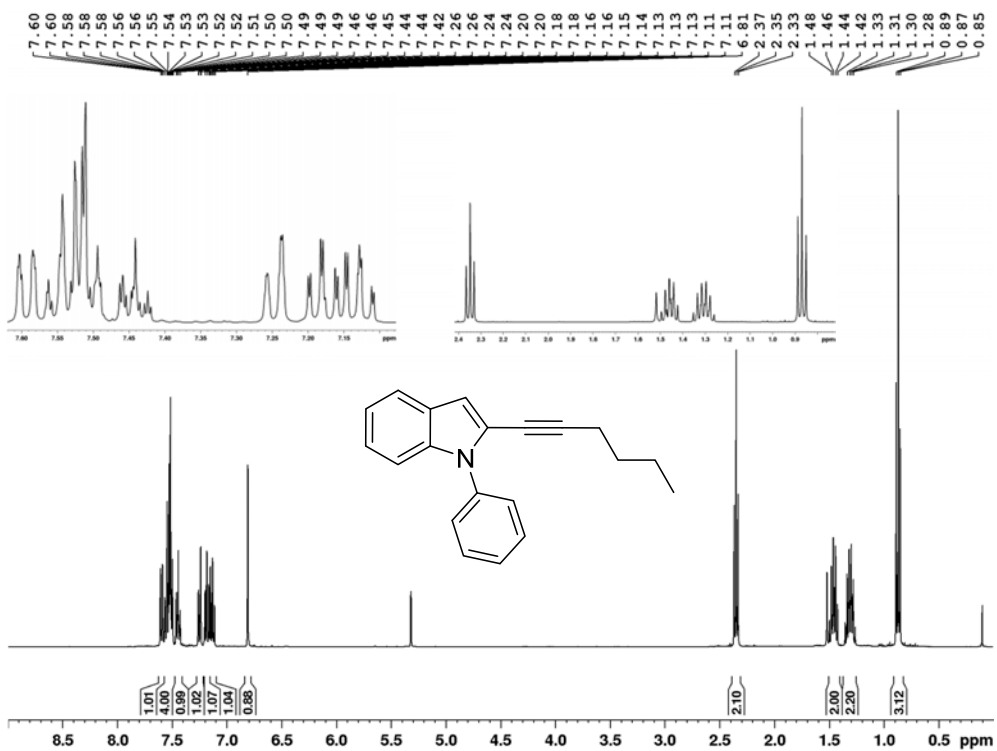

Figure S15.  $^1\text{H}$  NMR spectrum (400 MHz,  $\text{CD}_2\text{Cl}_2$ ) of **1h**.

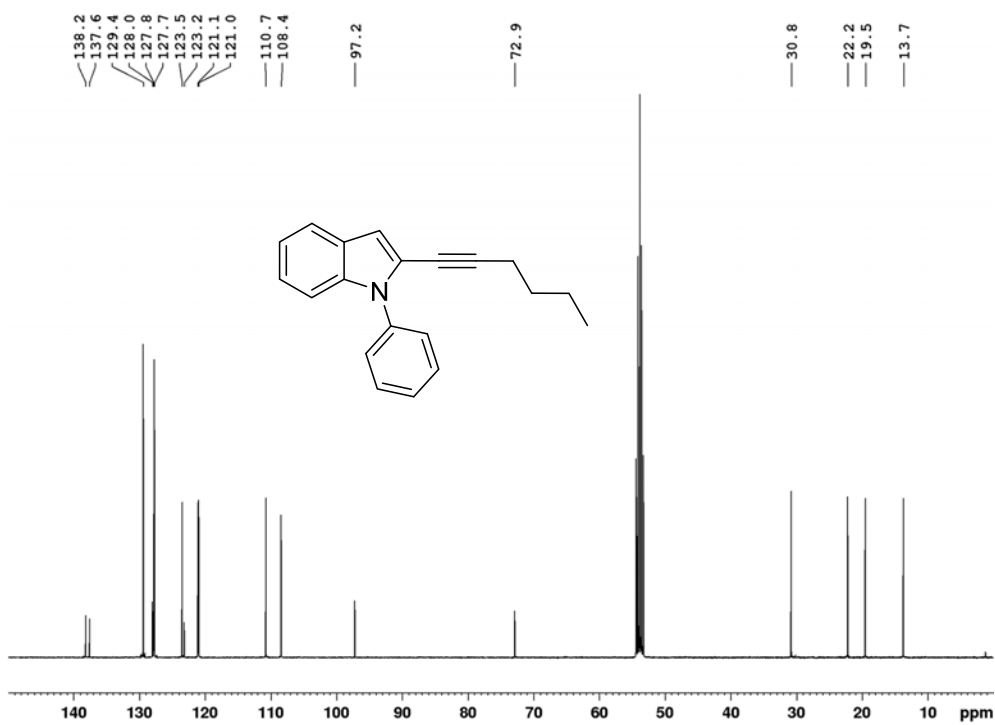

Figure S16.  $^{13}\text{C}\{^1\text{H}\}$  NMR spectrum (101 MHz,  $\text{CD}_2\text{Cl}_2$ ) of 1h.

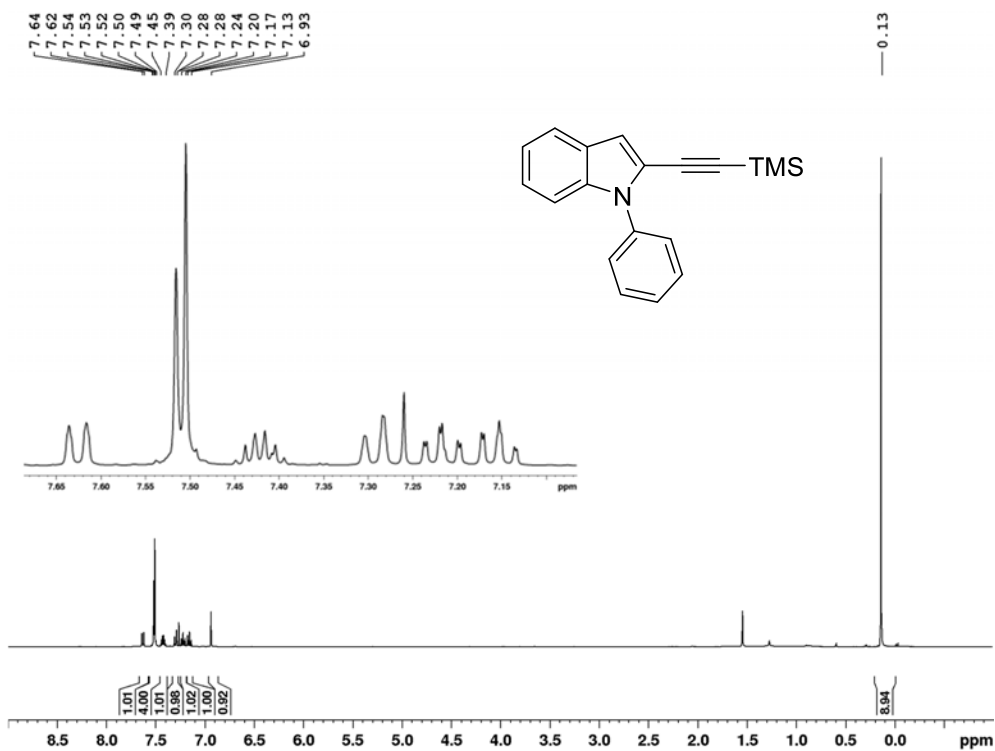

Figure S17.  $^1\text{H}$  NMR spectrum (400 MHz,  $\text{CDCl}_3$ ) of 1r-TMS.

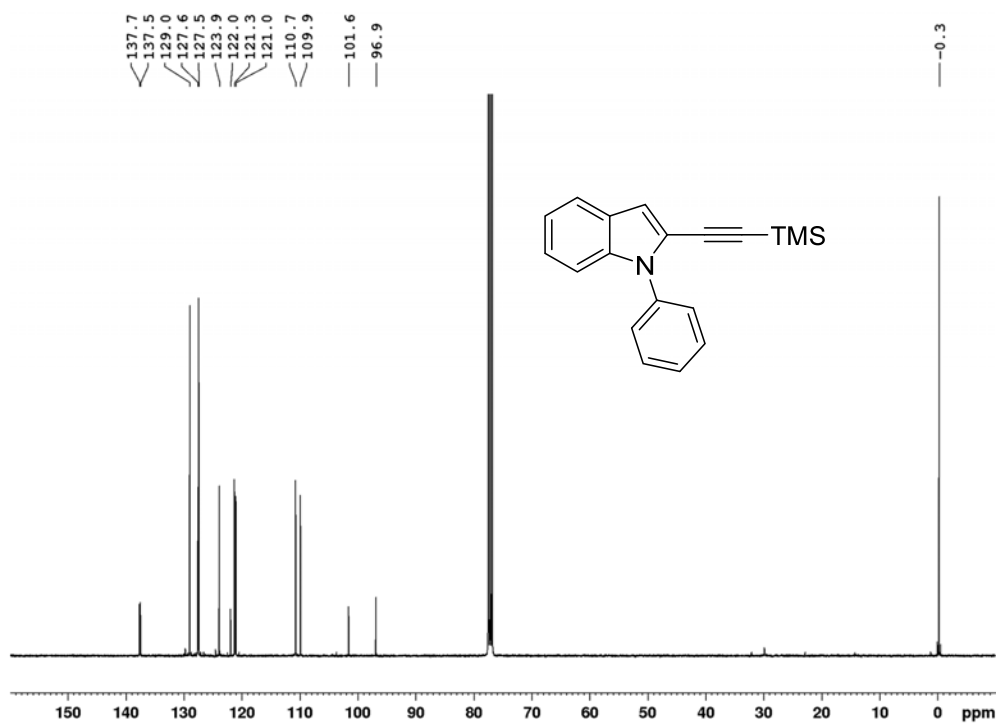

Figure S18.  $^{13}\text{C}\{^1\text{H}\}$  NMR spectrum (101 MHz,  $\text{CDCl}_3$ ) of 1r-TMS.

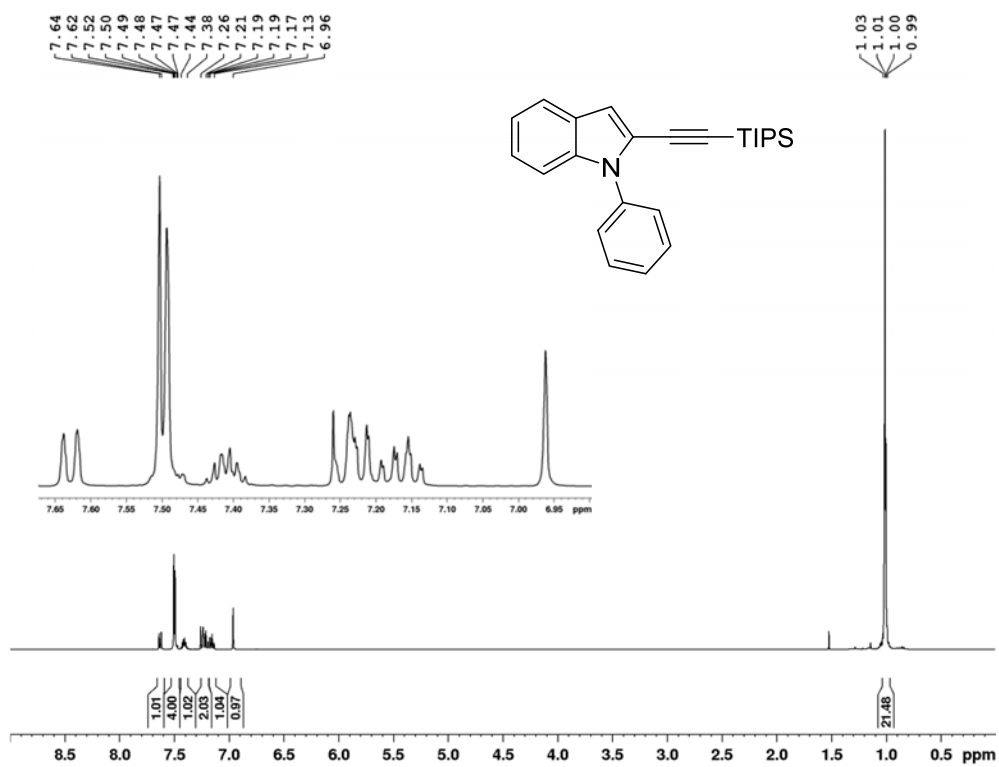

Figure S19.  $^1\text{H}$  NMR spectrum (400 MHz,  $\text{CDCl}_3$ ) of 1r-TIPS.

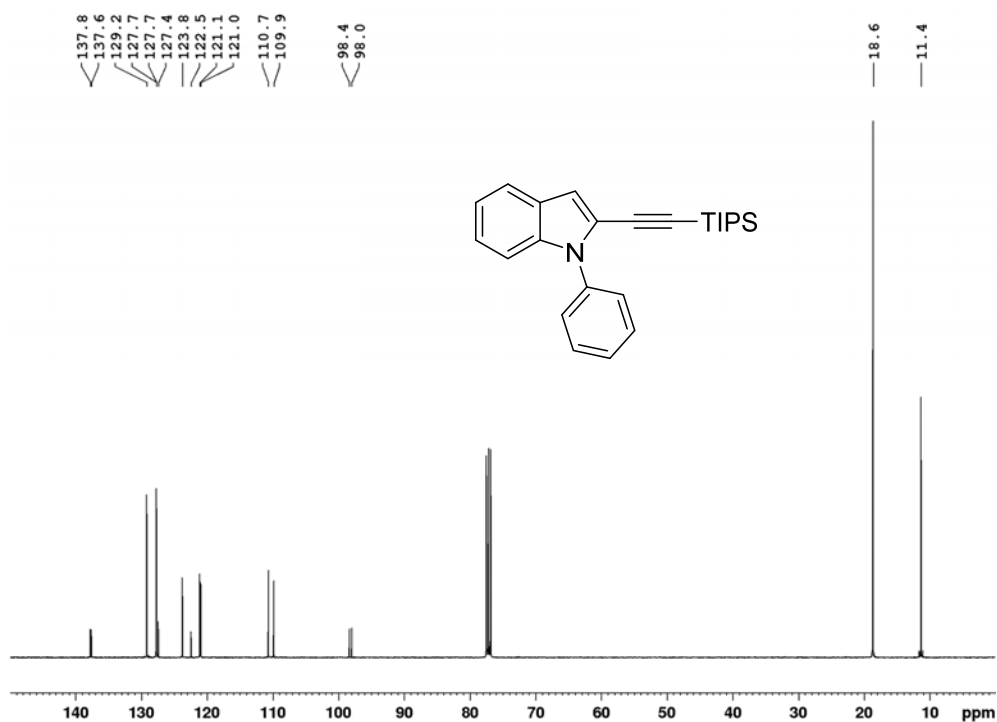

Figure S20.  $^{13}\text{C}\{^1\text{H}\}$  NMR spectrum (101 MHz,  $\text{CDCl}_3$ ) of 1r-TIPS.

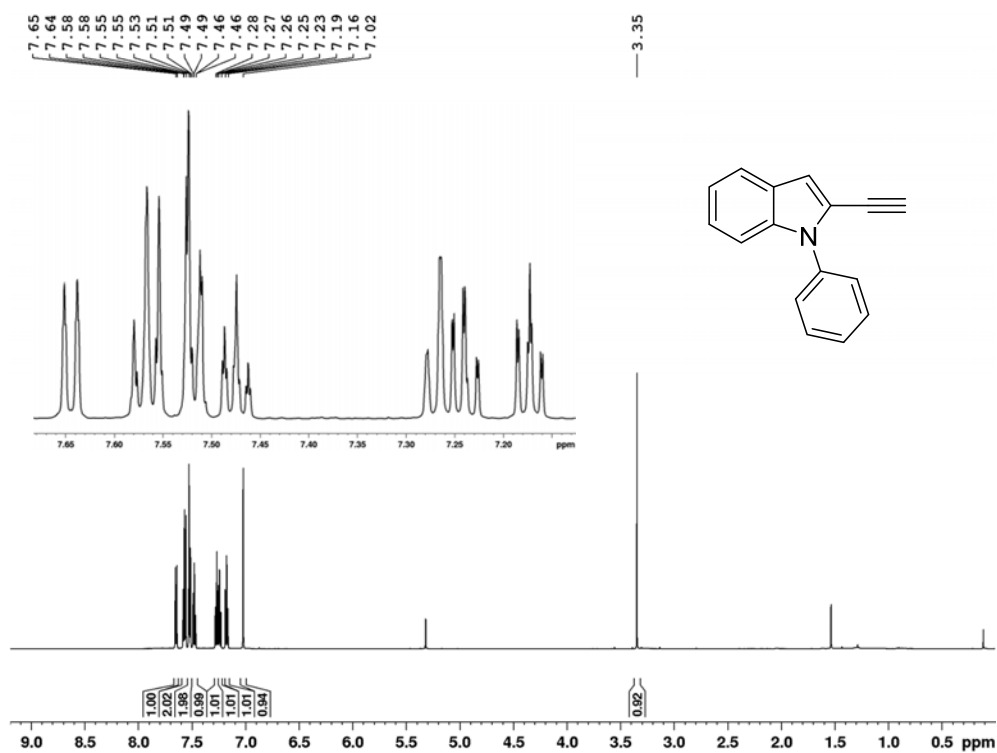

Figure S21.  $^1\text{H}$  NMR spectrum (600 MHz,  $\text{CD}_2\text{Cl}_2$ ) of 1r-H.

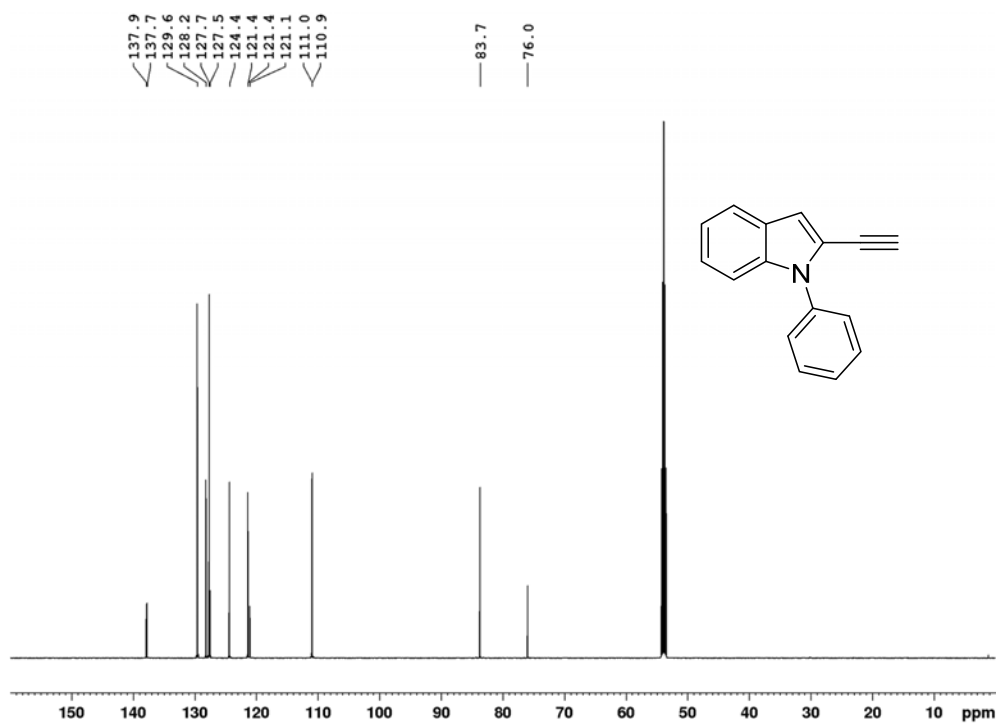

Figure S22.  $^{13}\text{C}\{^1\text{H}\}$  NMR spectrum (151 MHz,  $\text{CD}_2\text{Cl}_2$ ) of 1r-H.

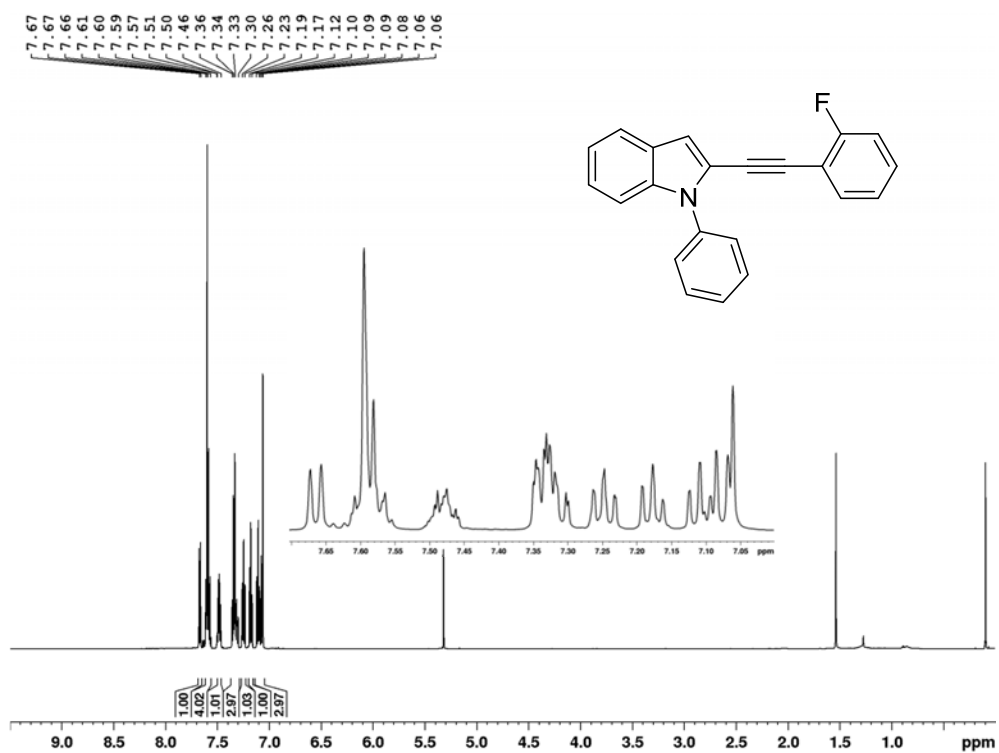

Figure S23.  $^1\text{H}\{^{19}\text{F}\}$  NMR spectrum (500 MHz,  $\text{CD}_2\text{Cl}_2$ ) of 1k.

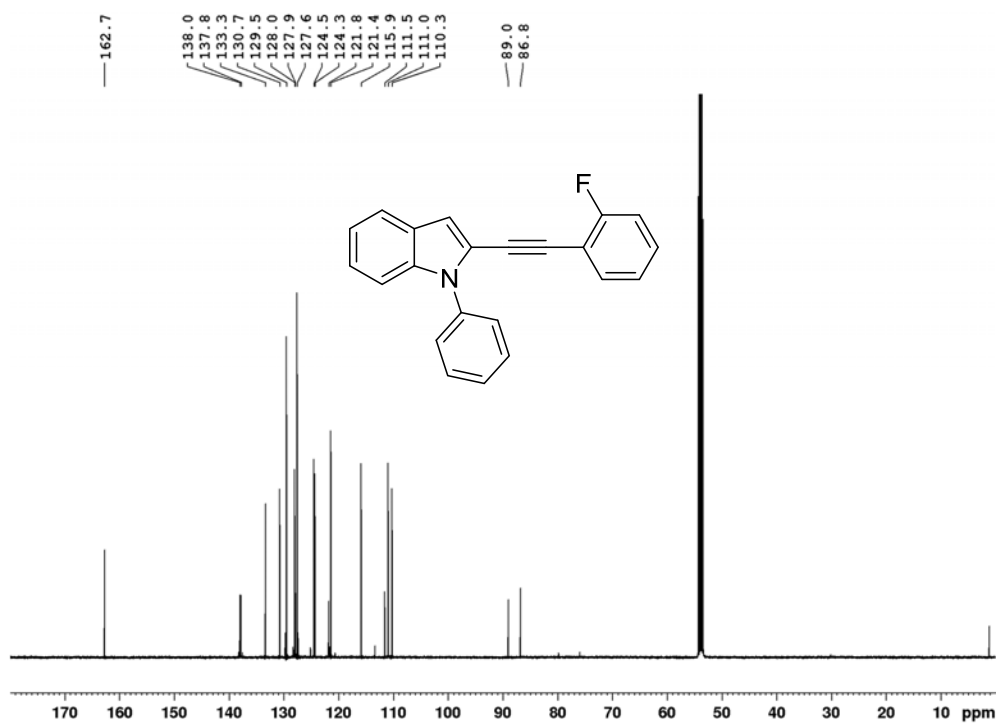

Figure S24.  $^{13}\text{C}\{^1\text{H}, ^{19}\text{F}\}$  NMR spectrum (126 MHz,  $\text{CD}_2\text{Cl}_2$ ) of 1k.

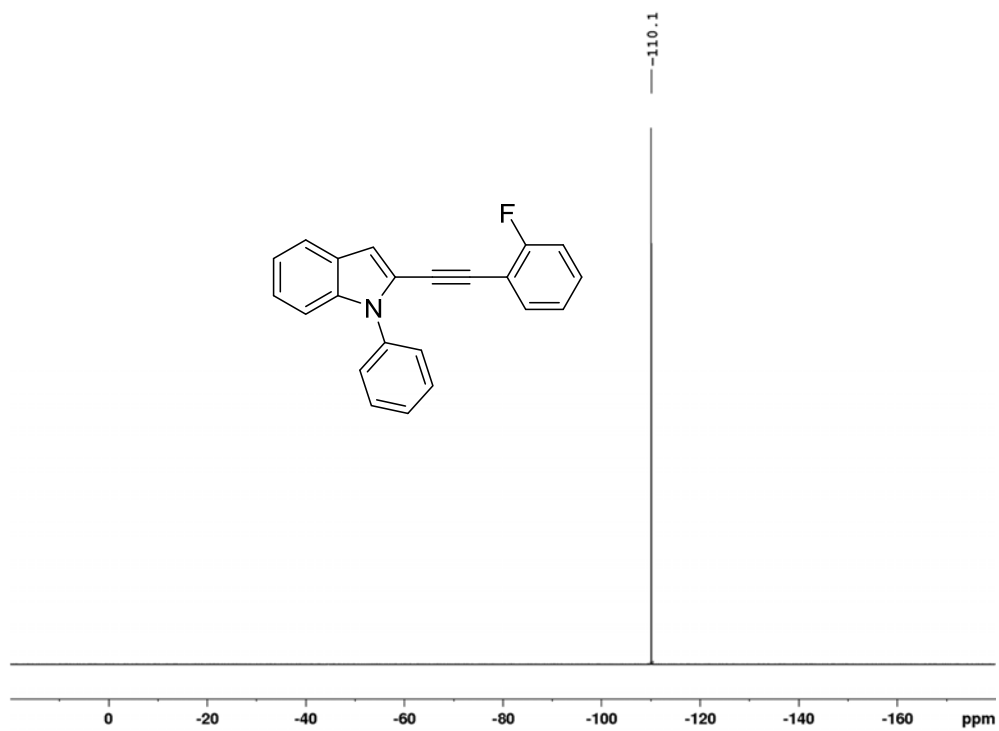

Figure S25.  $^{19}\text{F}\{^1\text{H}\}$  NMR spectrum (471 MHz,  $\text{CD}_2\text{Cl}_2$ ) of 1k.



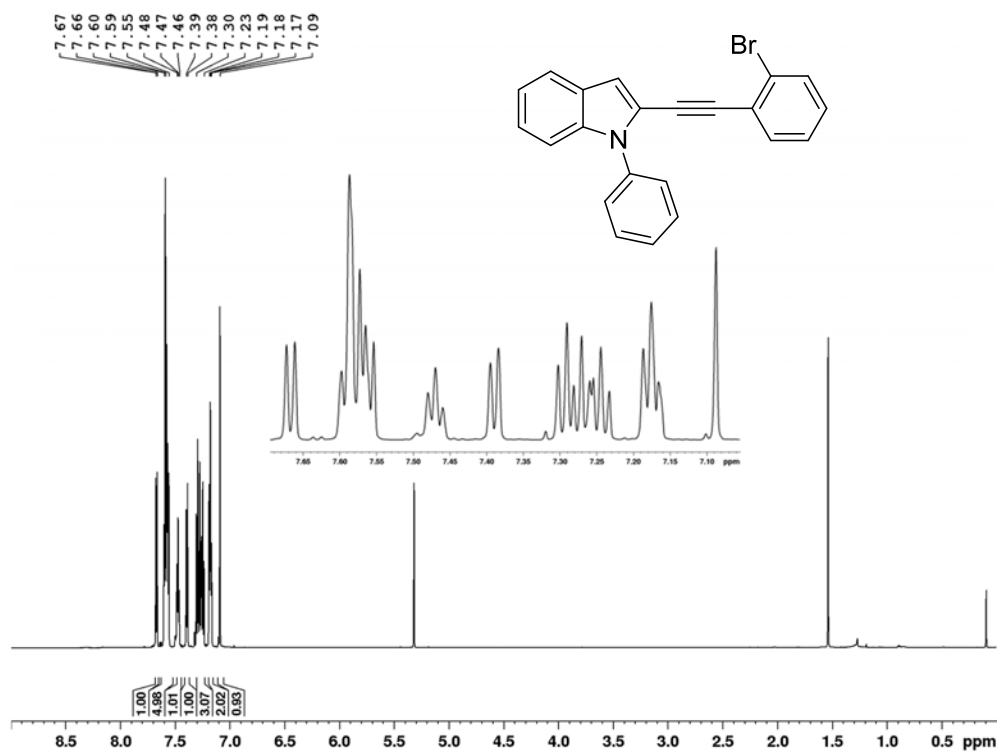

Figure S26. <sup>1</sup>H NMR spectrum (700 MHz, CD<sub>2</sub>Cl<sub>2</sub>) of 11.

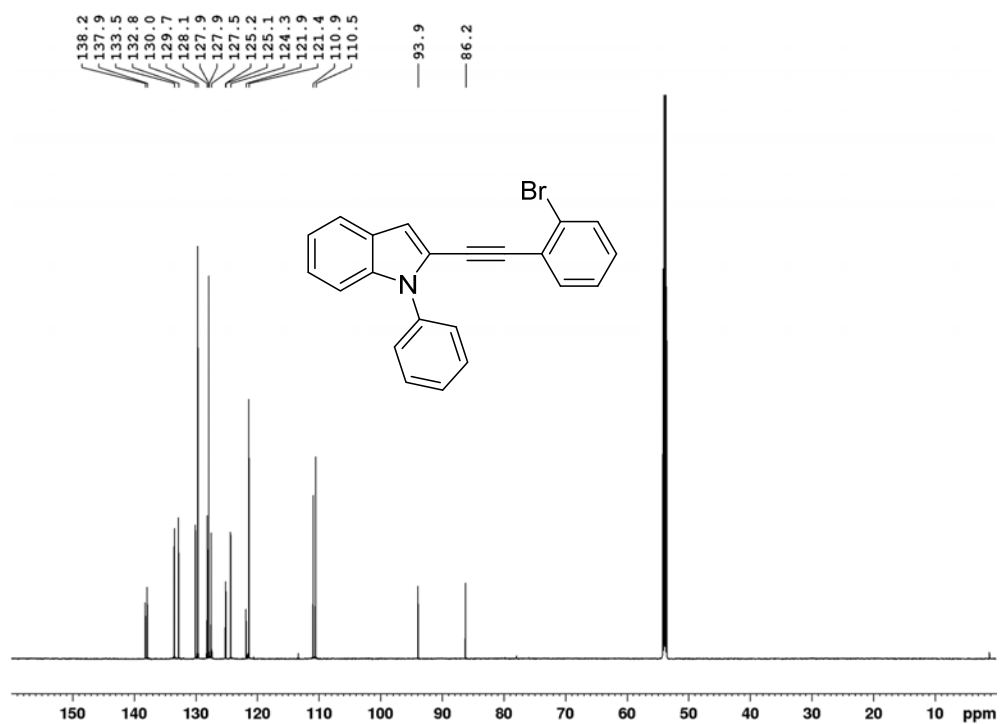

Figure S27. <sup>13</sup>C{<sup>1</sup>H} NMR spectrum (176 MHz, CD<sub>2</sub>Cl<sub>2</sub>) of 11.

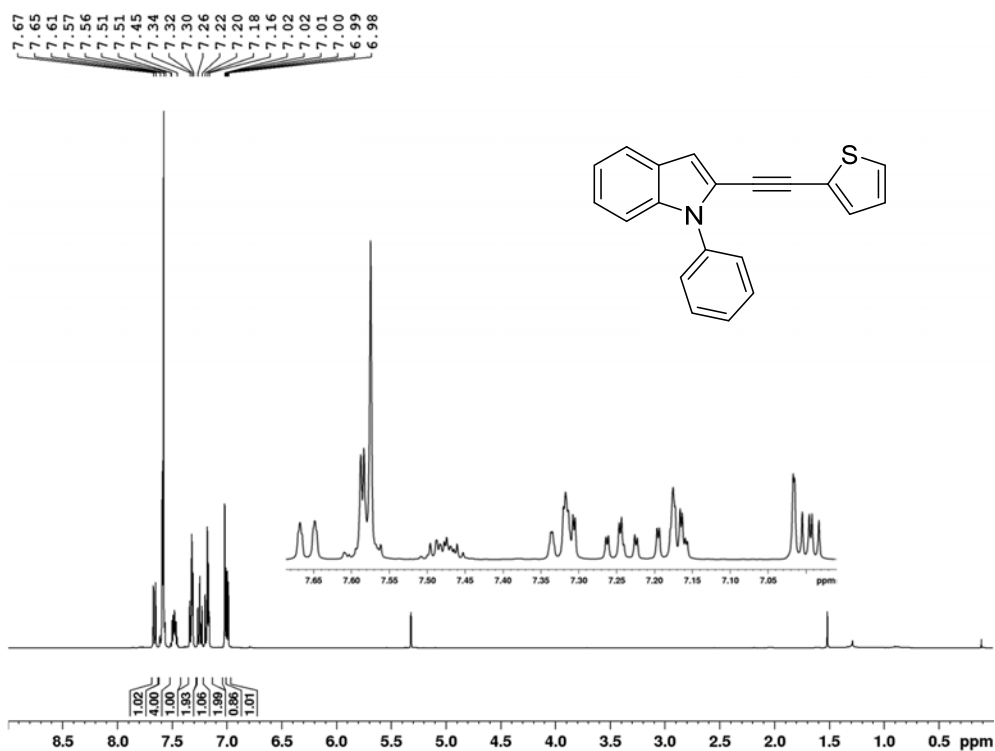

Figure S28. <sup>1</sup>H NMR spectrum (400 MHz, CD<sub>2</sub>Cl<sub>2</sub>) of 1m.

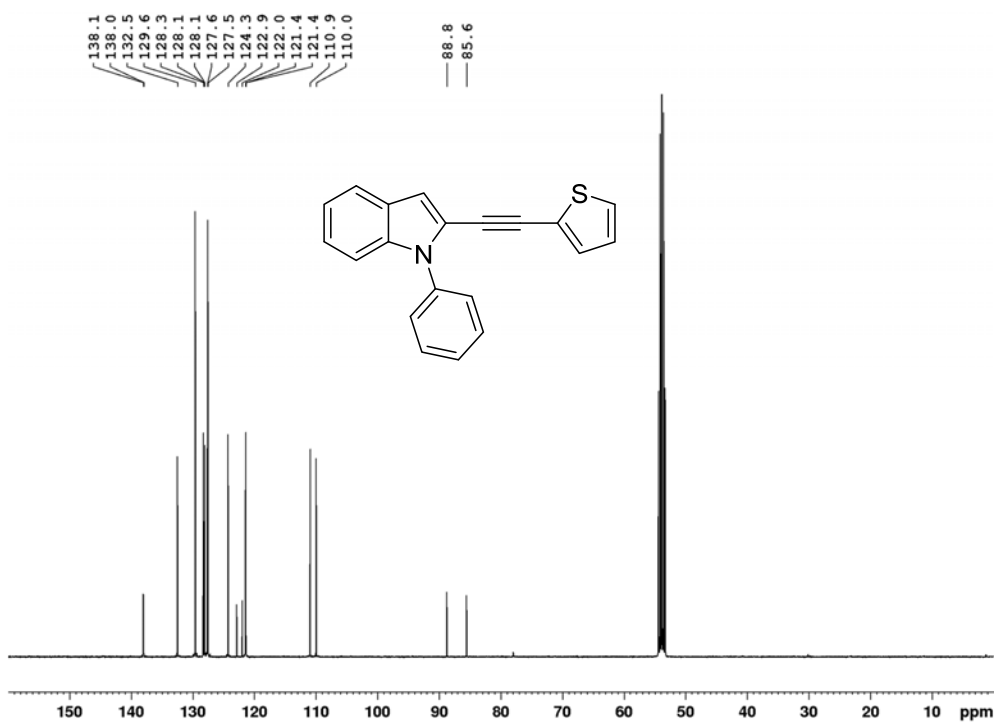

Figure S29. <sup>13</sup>C{<sup>1</sup>H} NMR spectrum (101 MHz, CD<sub>2</sub>Cl<sub>2</sub>) of 1m.

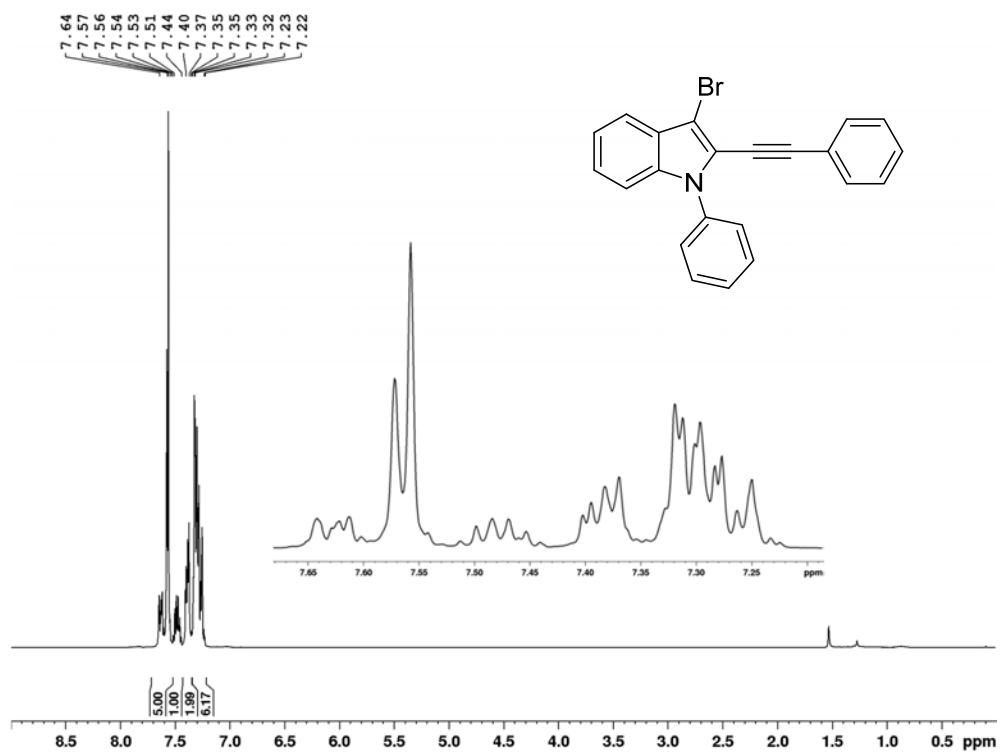

Figure S30. <sup>1</sup>H NMR spectrum (300 MHz, CDCl<sub>3</sub>) of **1s**.

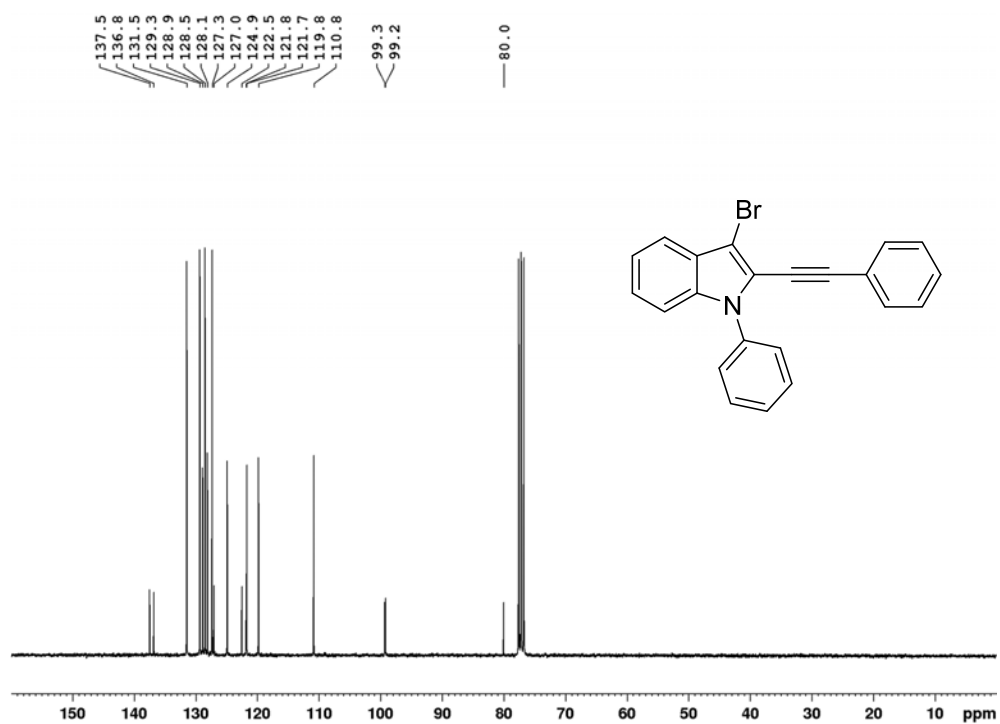

Figure S31. <sup>13</sup>C{<sup>1</sup>H} NMR spectrum (75 MHz, CDCl<sub>3</sub>) of **1s**.

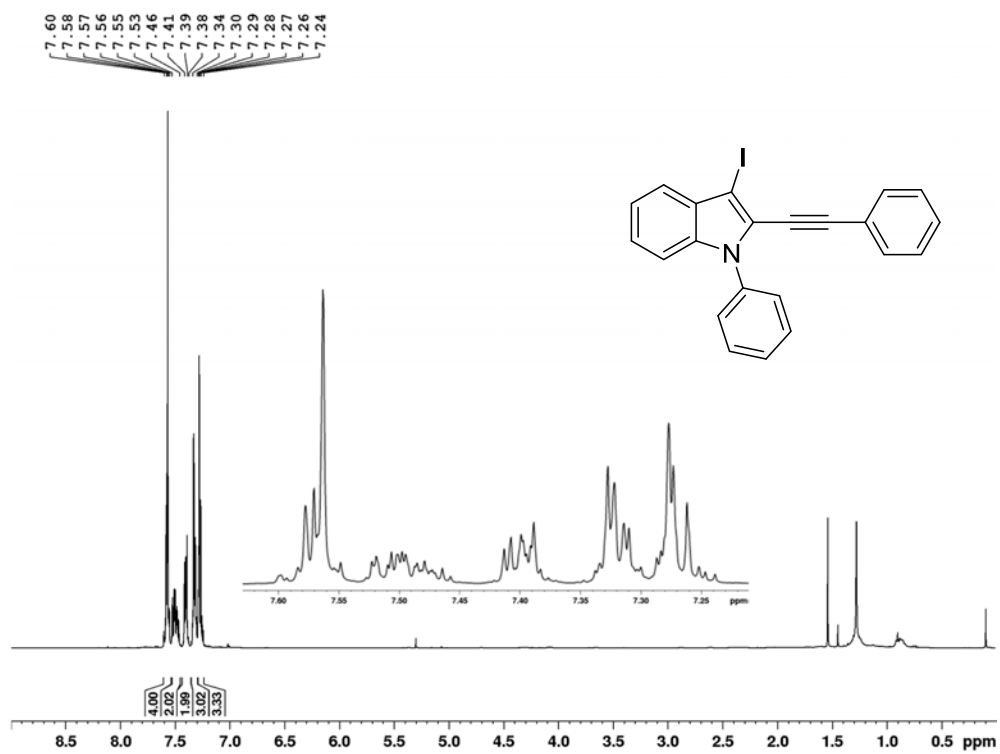

Figure S32. <sup>1</sup>H NMR spectrum (400 MHz, CDCl<sub>3</sub>) of 1t.

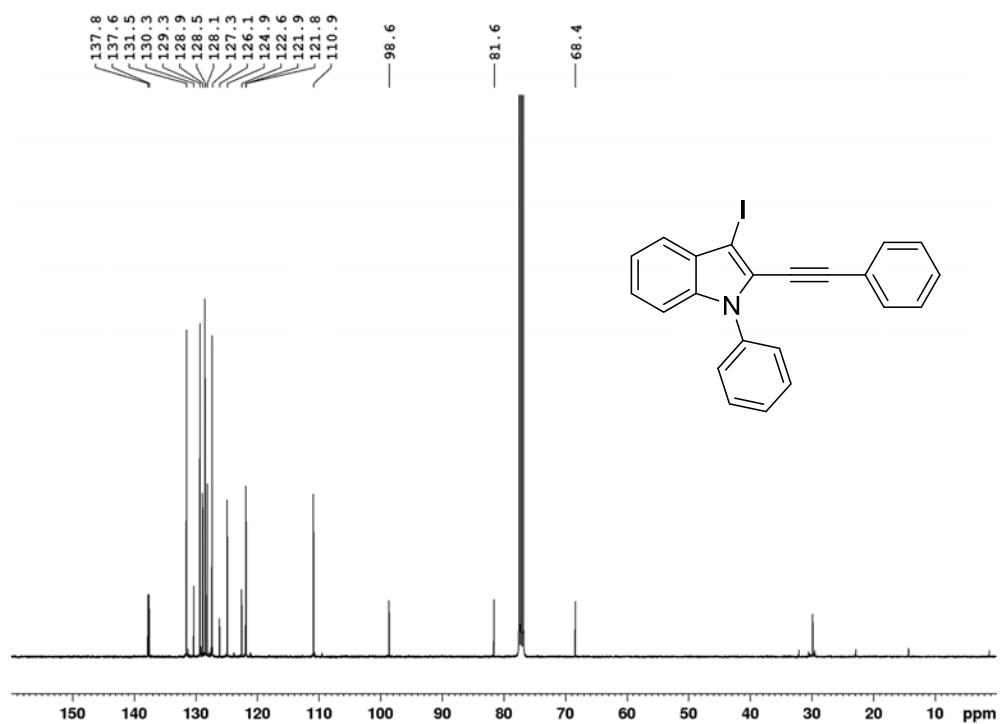

Figure S33. <sup>13</sup>C{<sup>1</sup>H} NMR spectrum (101 MHz, CDCl<sub>3</sub>) of 1t.

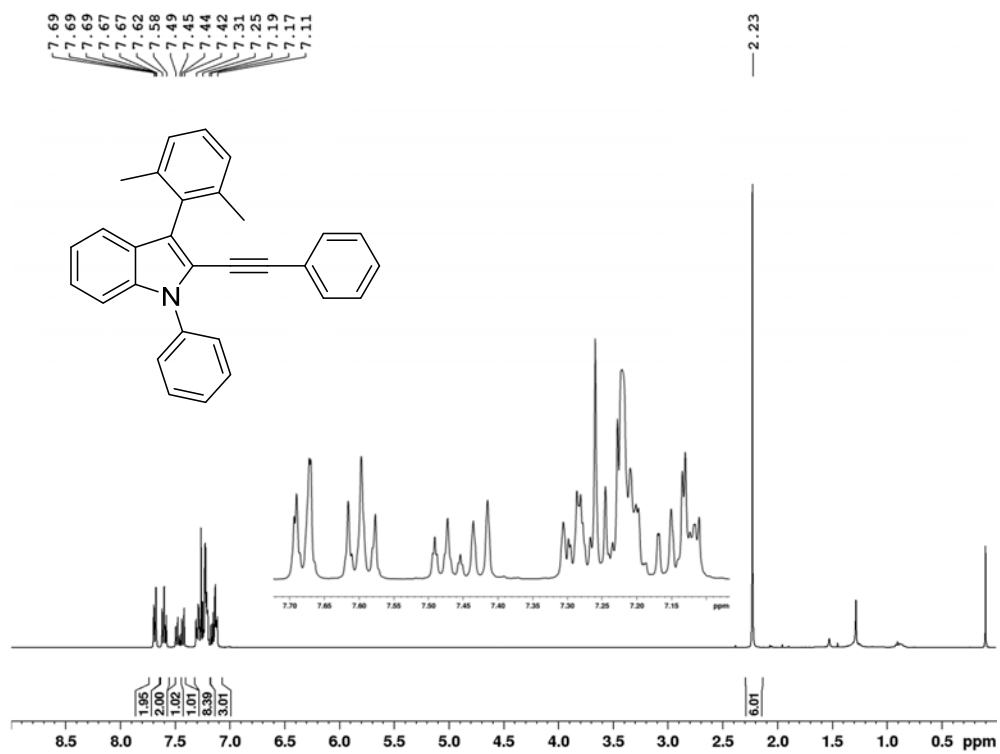

Figure S34. <sup>1</sup>H NMR spectrum (400 MHz, CDCl<sub>3</sub>) of **1o**.

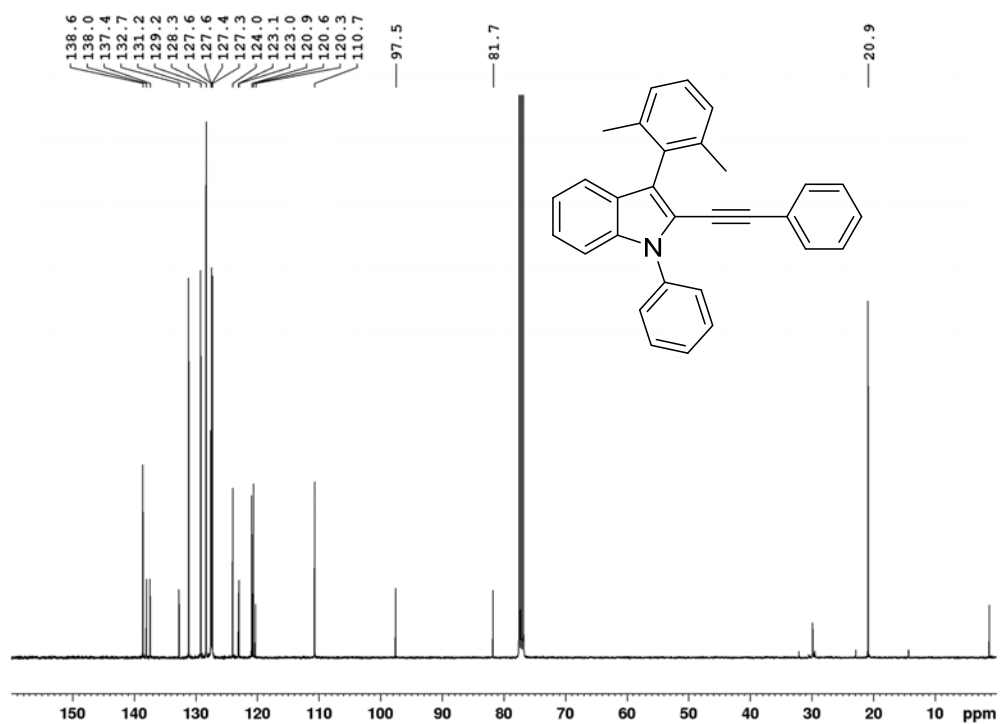

Figure S35. <sup>13</sup>C{<sup>1</sup>H} NMR spectrum (101 MHz, CDCl<sub>3</sub>) of **1o**.

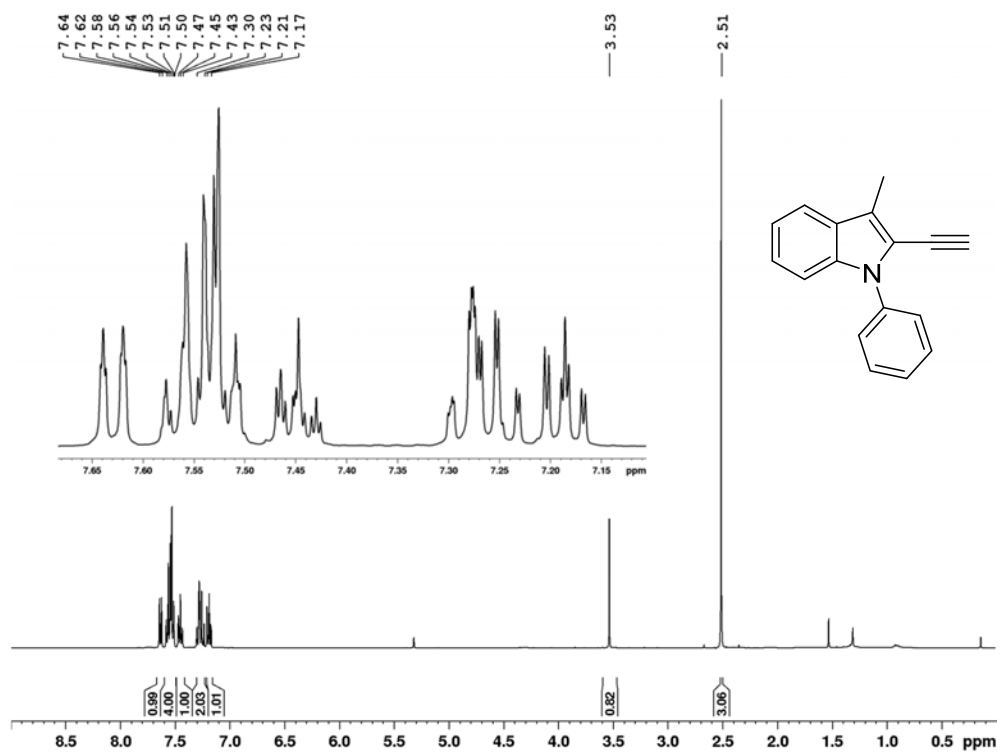

Figure S36. <sup>1</sup>H NMR spectrum (400 MHz, CD<sub>2</sub>Cl<sub>2</sub>) of 1q.

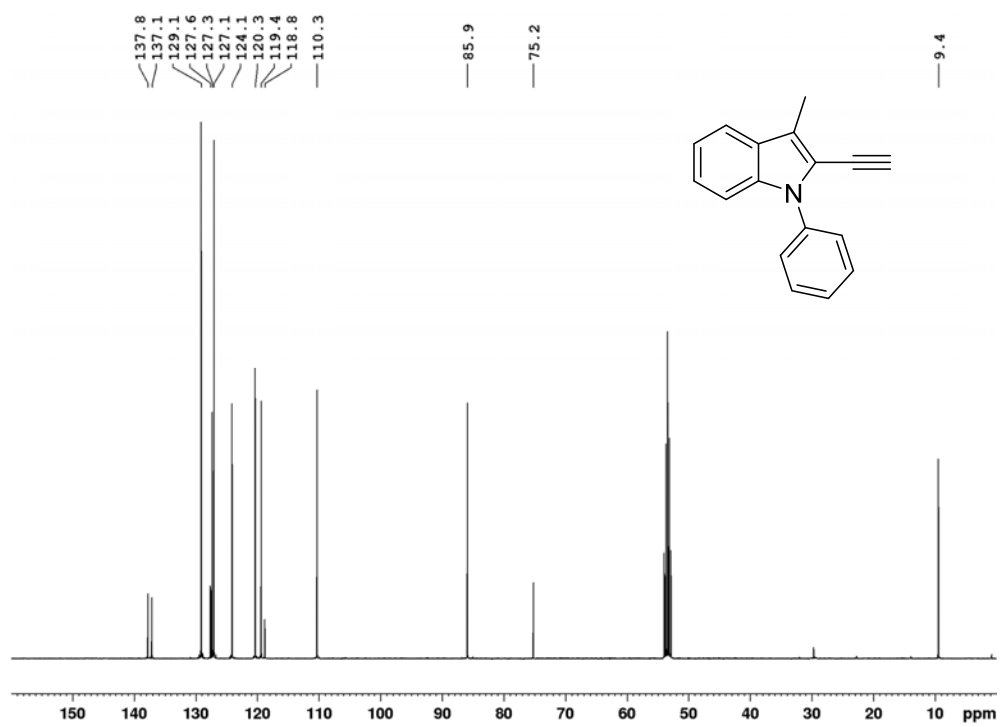

Figure S37. <sup>13</sup>C{<sup>1</sup>H} NMR spectrum (101 MHz, CD<sub>2</sub>Cl<sub>2</sub>) of 1q.

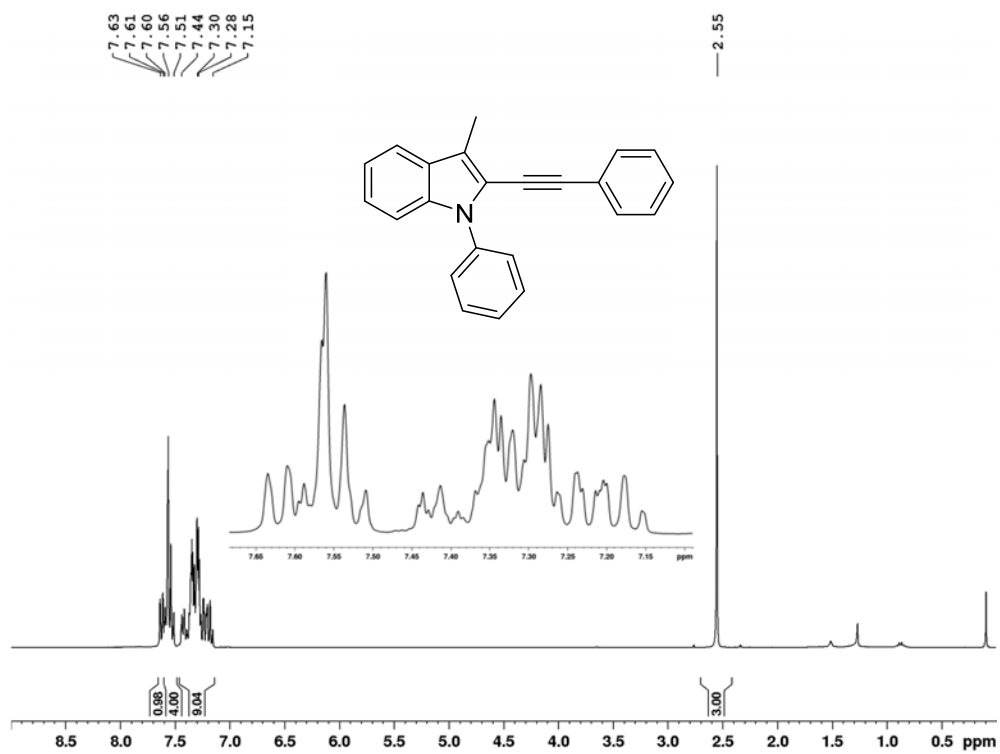

Figure S38. <sup>1</sup>H NMR spectrum (300 MHz, CDCl<sub>3</sub>) of 1p.

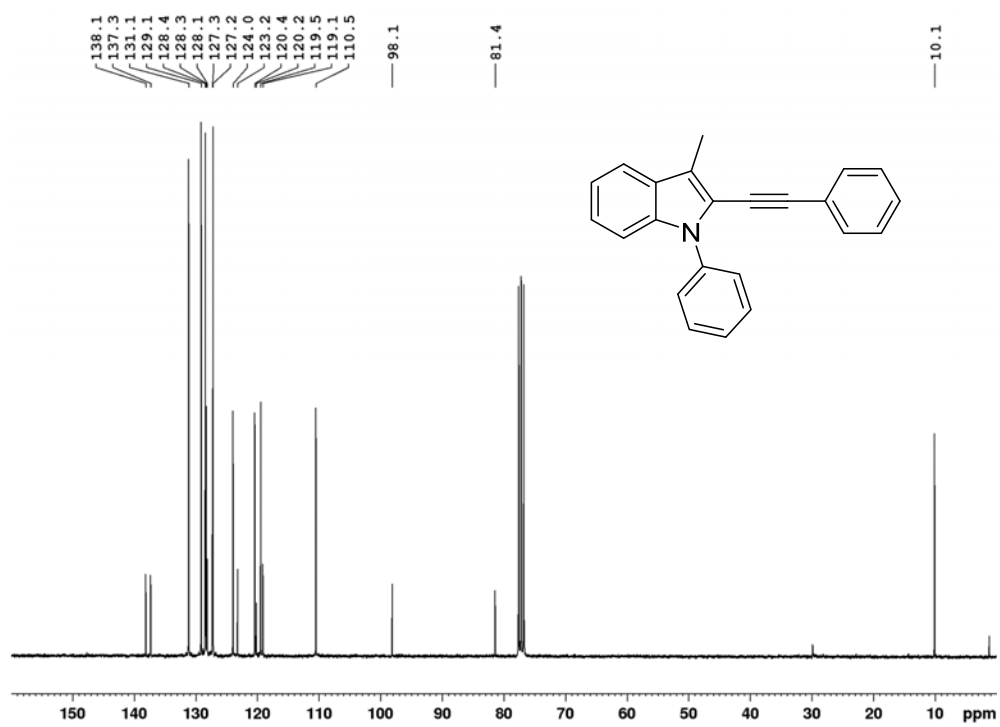

Figure S39. <sup>13</sup>C{<sup>1</sup>H} NMR spectrum (75 MHz, CDCl<sub>3</sub>) of 1p.

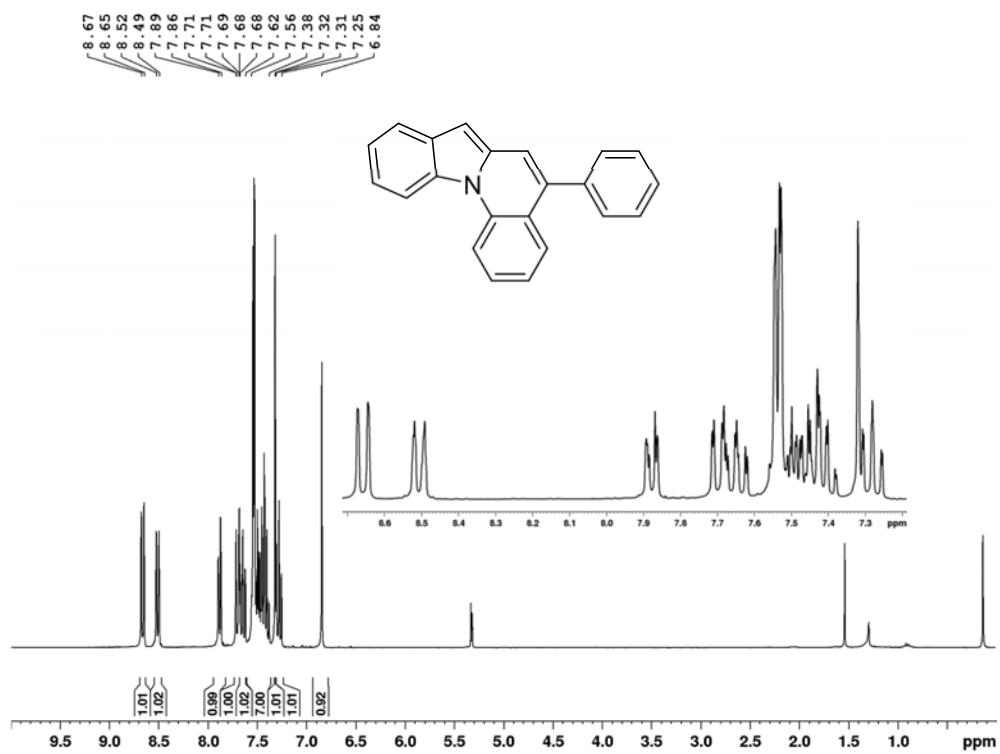

Figure S40. <sup>1</sup>H NMR spectrum (301 MHz, CD<sub>2</sub>Cl<sub>2</sub>) of 2a.

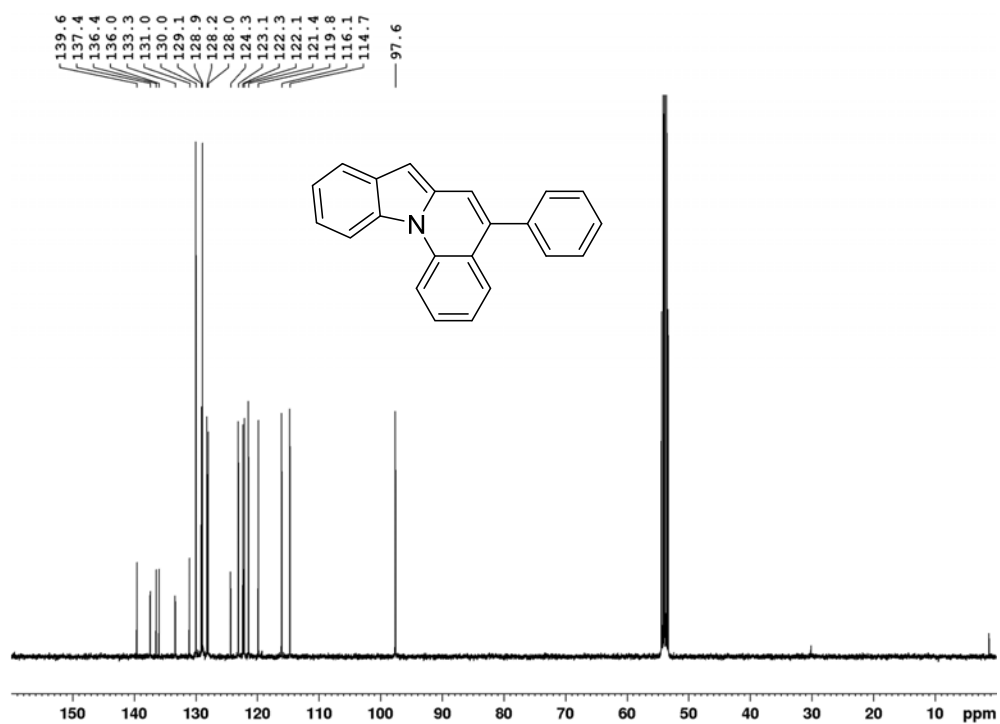

Figure S41. <sup>13</sup>C{<sup>1</sup>H} NMR spectrum (101 MHz, CD<sub>2</sub>Cl<sub>2</sub>) of 2a.



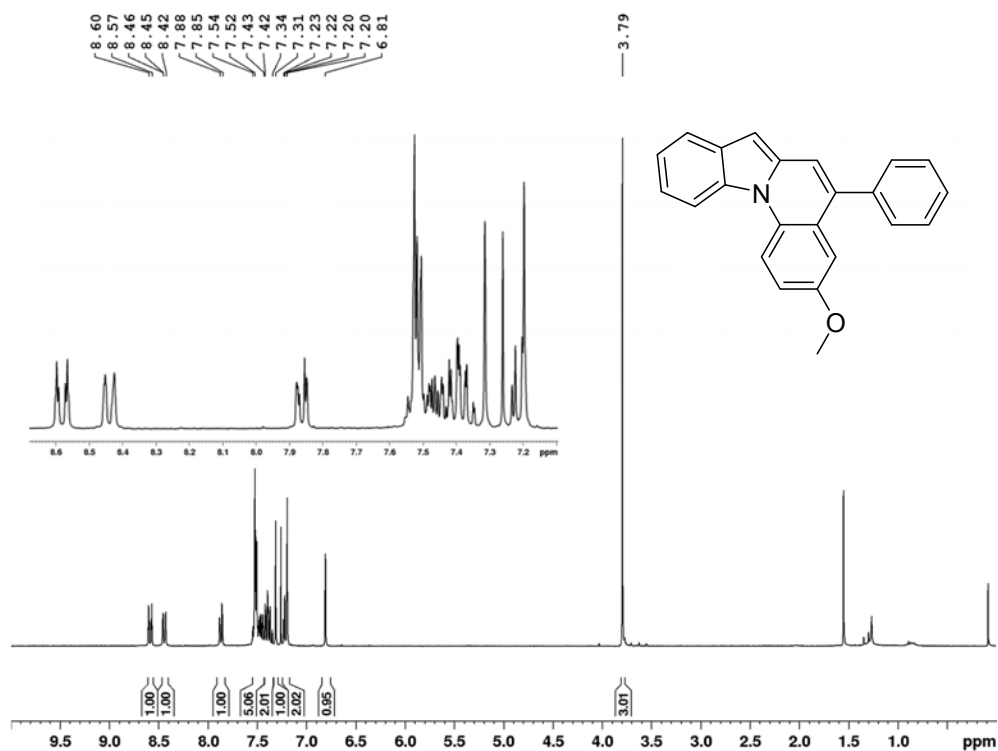

Figure S42. <sup>1</sup>H NMR spectrum (301 MHz, CDCl<sub>3</sub>) of 2b.

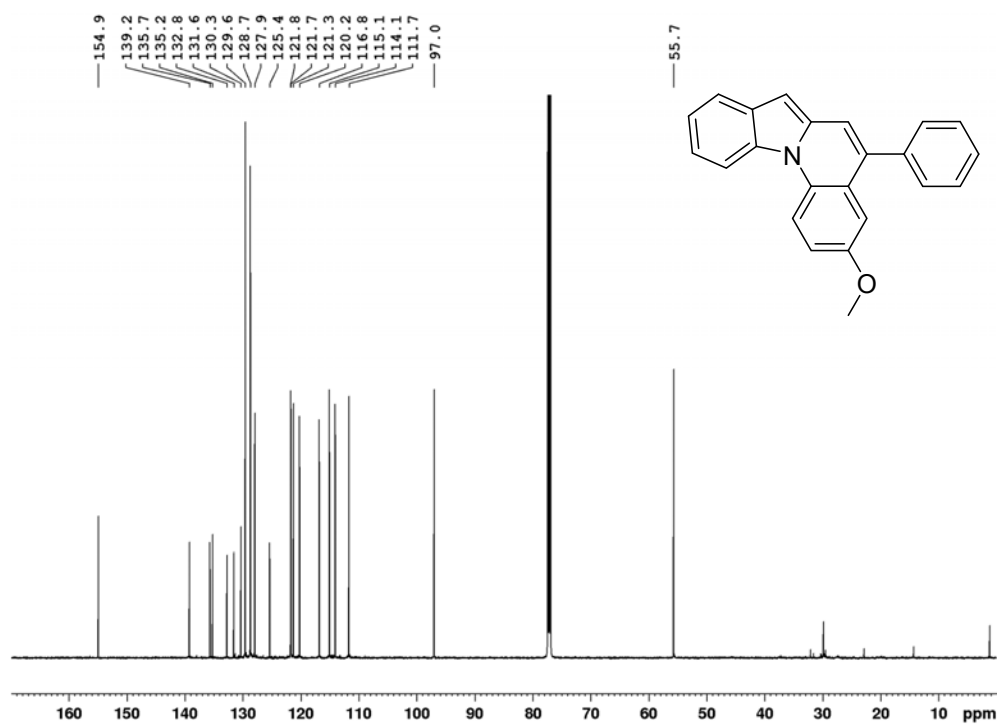

Figure S43. <sup>13</sup>C{<sup>1</sup>H} NMR spectrum (151 MHz, CDCl<sub>3</sub>) of 2b.

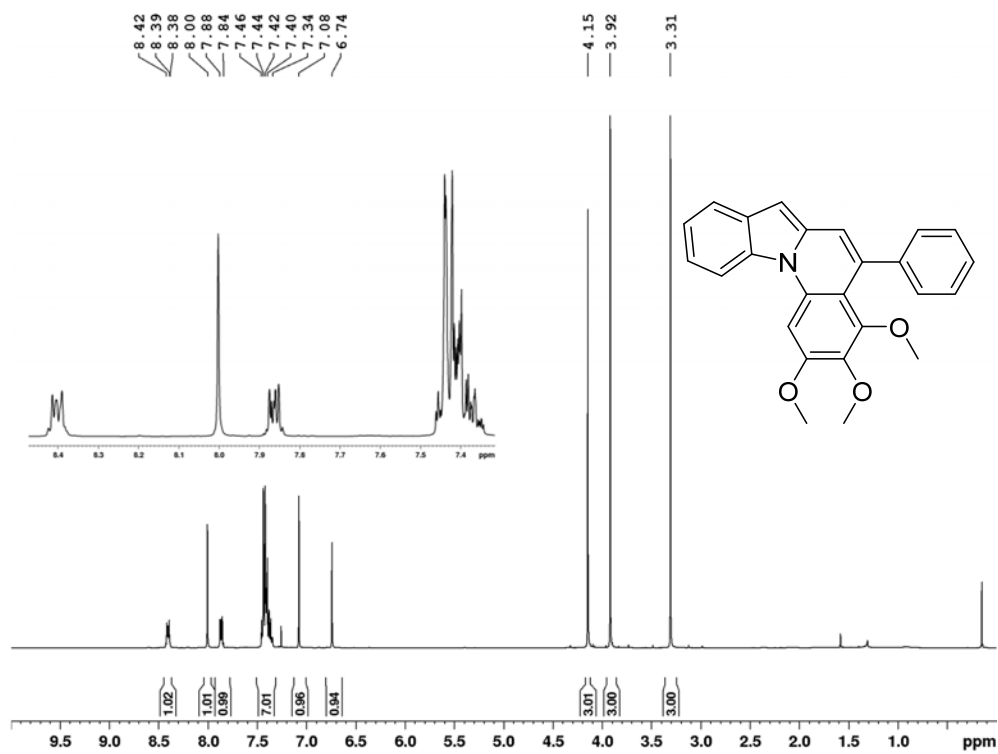

Figure S44. <sup>1</sup>H NMR spectrum (400 MHz, CDCl<sub>3</sub>) of **2c**.

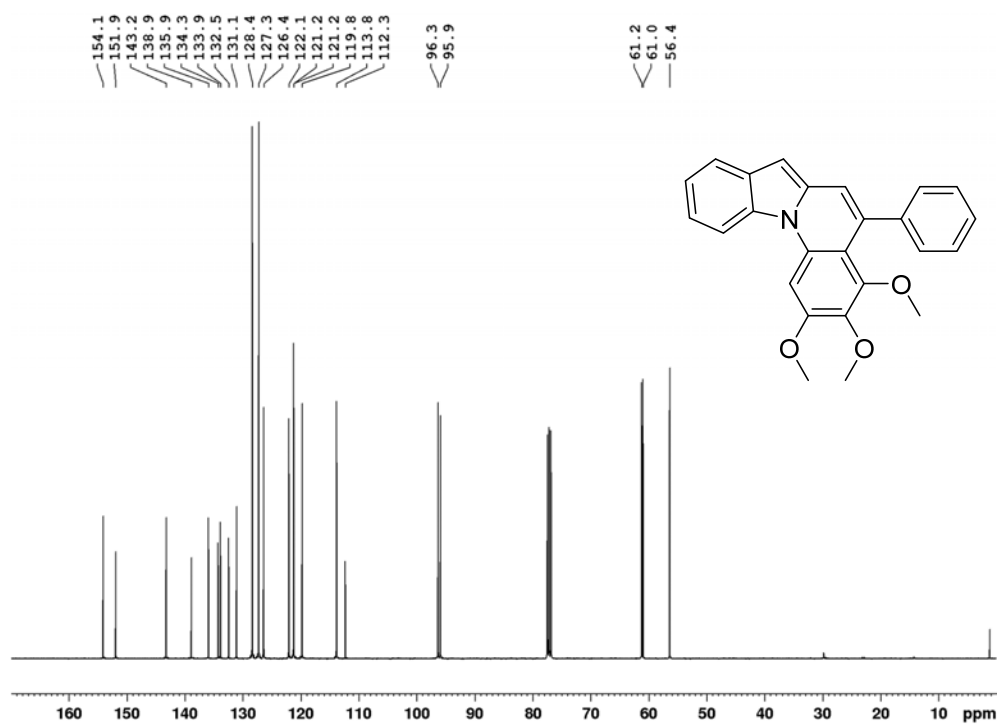

Figure S45. <sup>13</sup>C{<sup>1</sup>H} NMR spectrum (101 MHz, CDCl<sub>3</sub>) of **2c**.

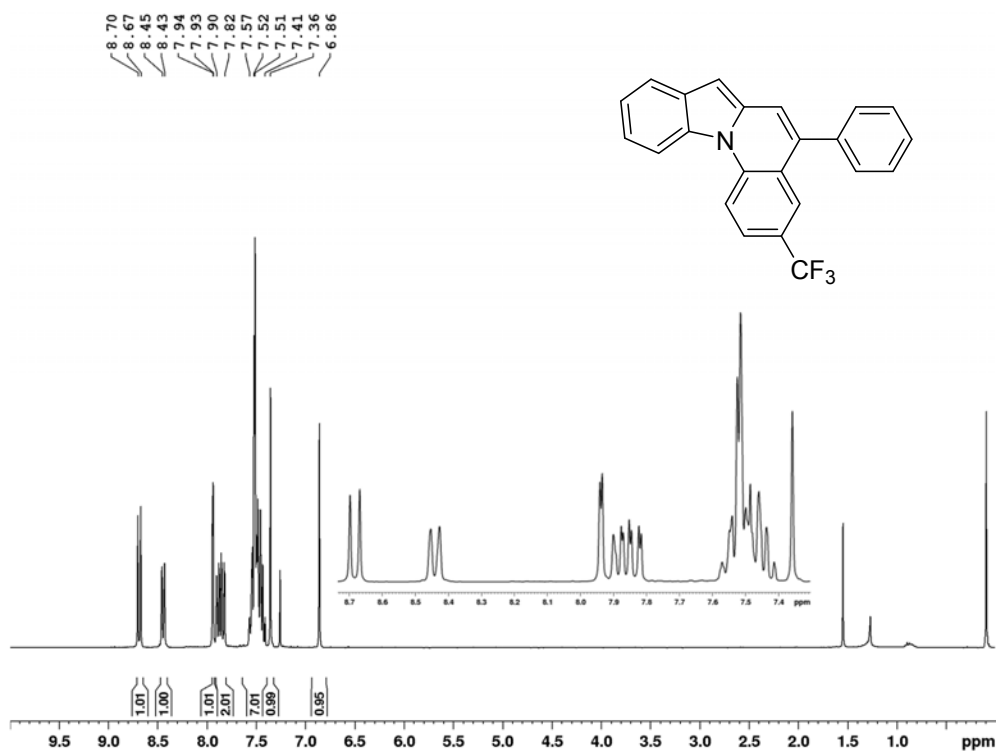

Figure S46.  $^1\text{H}\{^{19}\text{F}\}$  NMR spectrum (301 MHz,  $\text{CDCl}_3$ ) of **2d**.

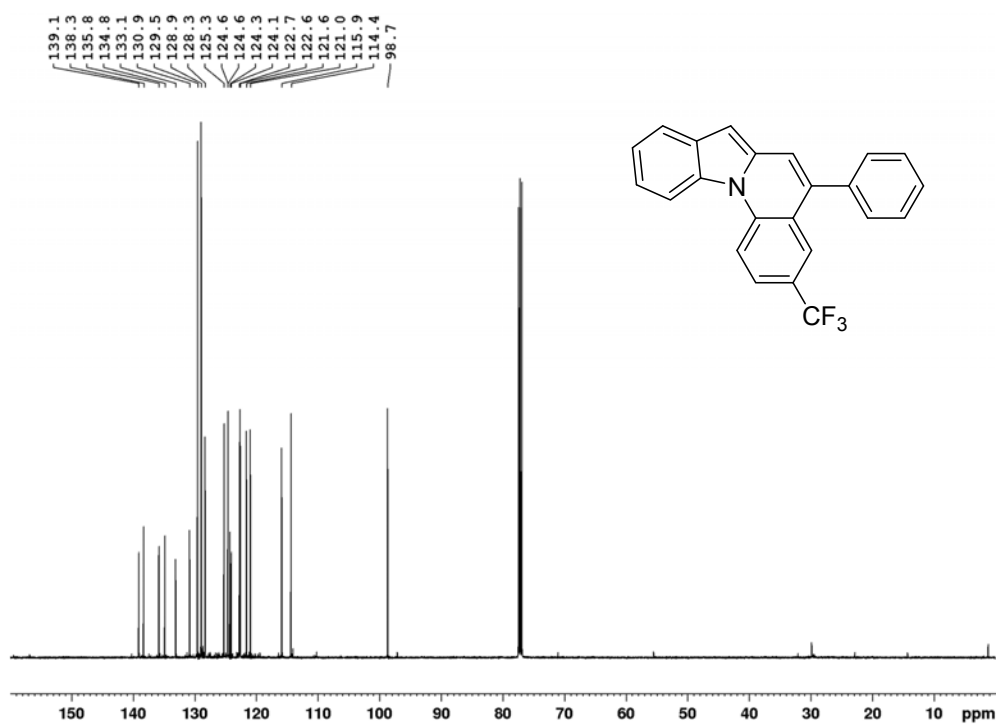

Figure S47.  $^{13}\text{C}\{^1\text{H},^{19}\text{F}\}$  NMR spectrum (126 MHz,  $\text{CDCl}_3$ ) of **2d**.

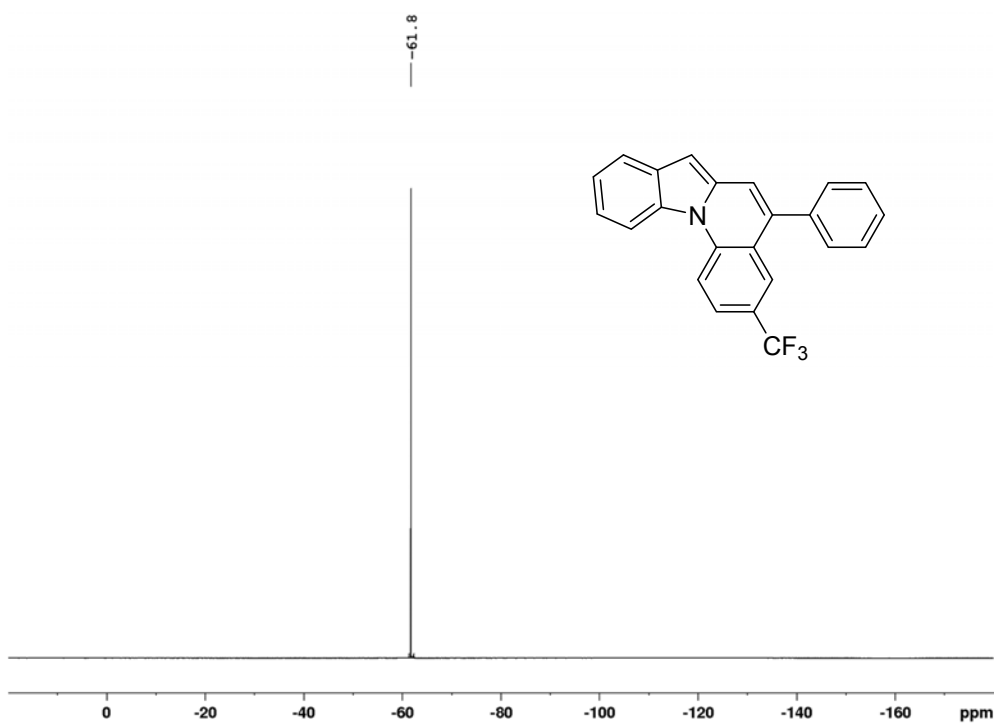

Figure S48.  $^{19}\text{F}\{^1\text{H}\}$  NMR spectrum (283 MHz,  $\text{CDCl}_3$ ) of **2d**.

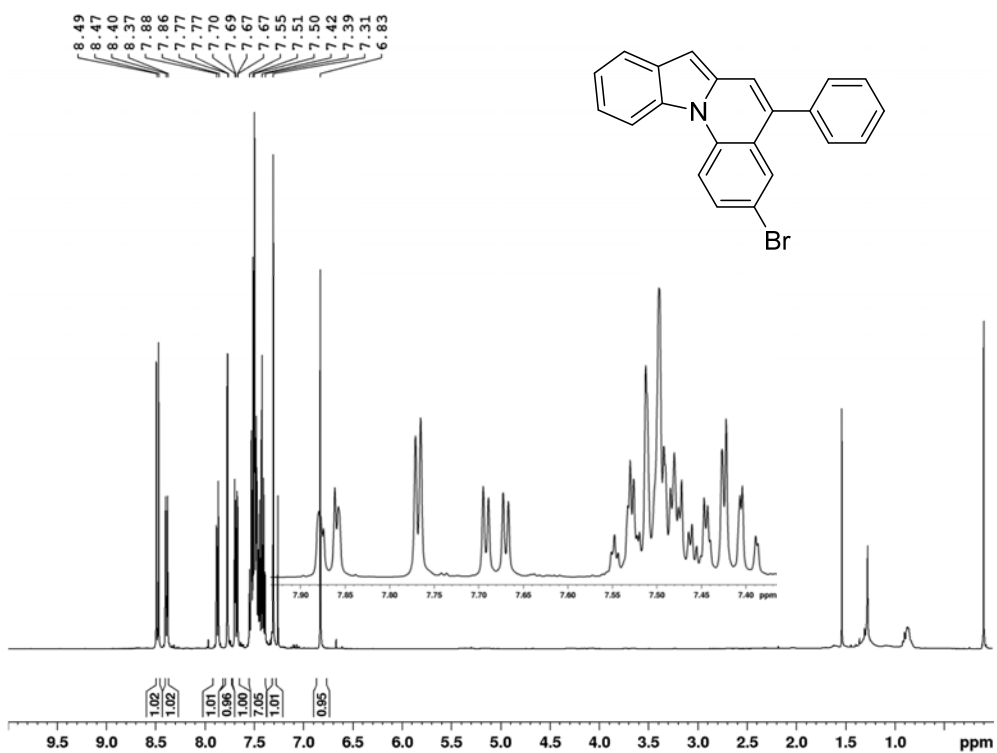

Figure S49.  $^1\text{H}$  NMR spectrum (400 MHz,  $\text{CDCl}_3$ ) of **2e**.

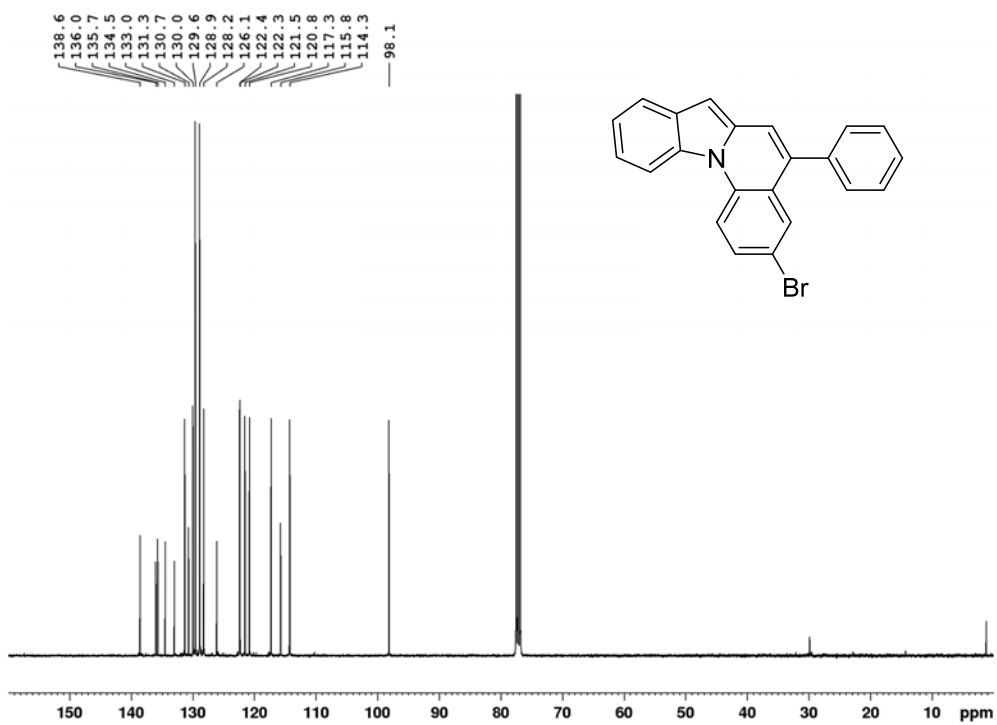

Figure S50.  $^{13}\text{C}\{^1\text{H}\}$  NMR spectrum (101 MHz,  $\text{CDCl}_3$ ) of 2e.

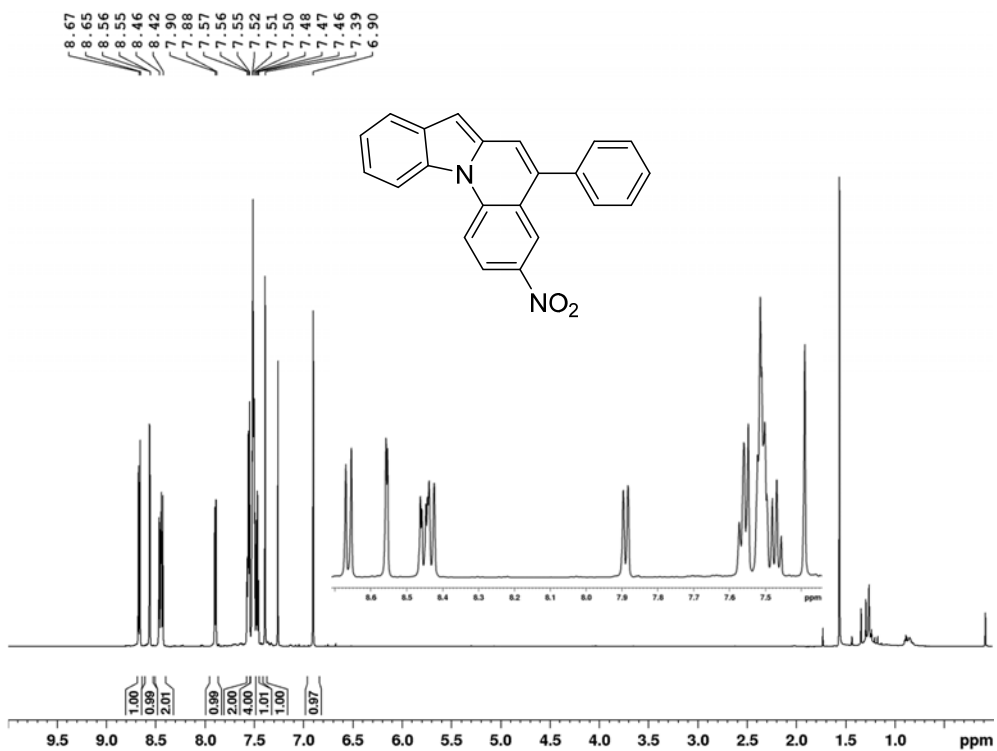

Figure S51.  $^1\text{H}$  NMR spectrum (600 MHz,  $\text{CDCl}_3$ ) of 2f.

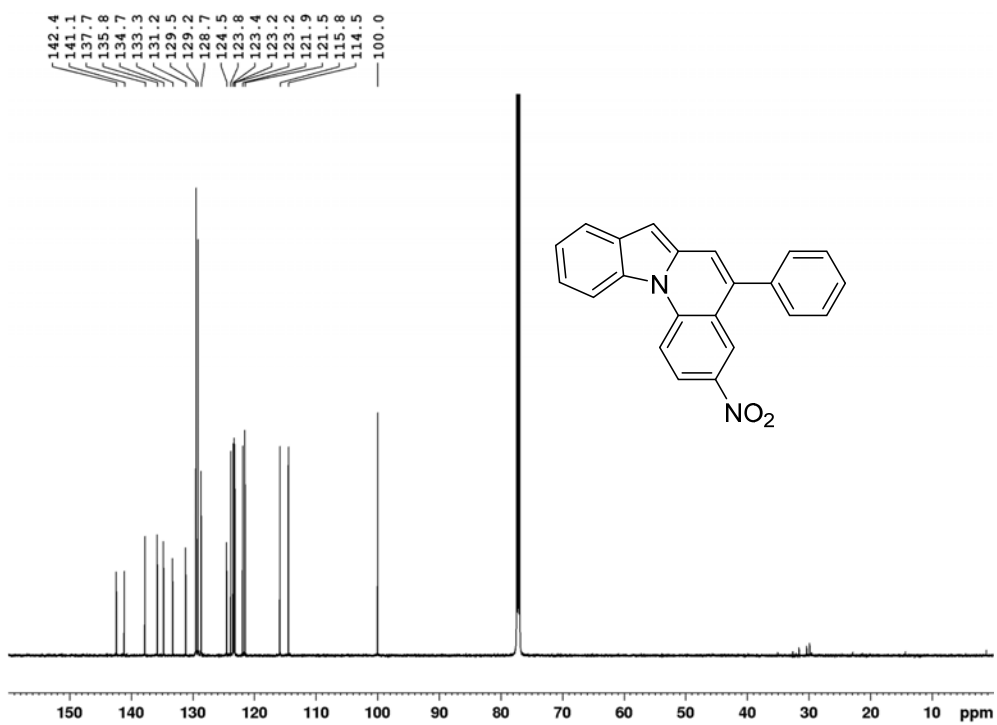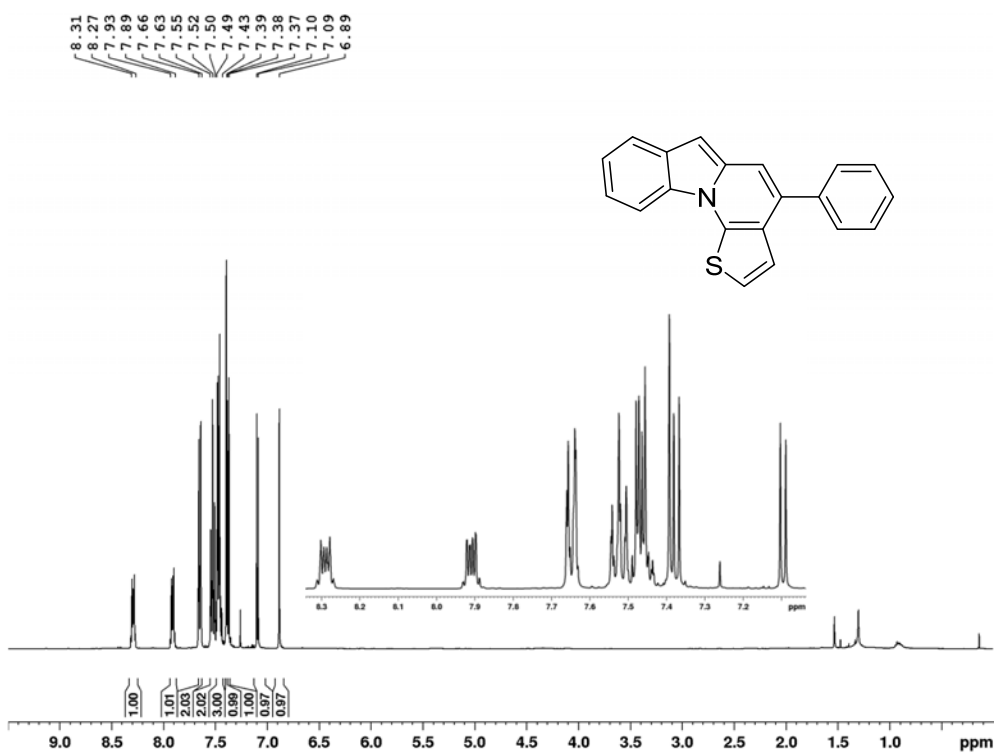

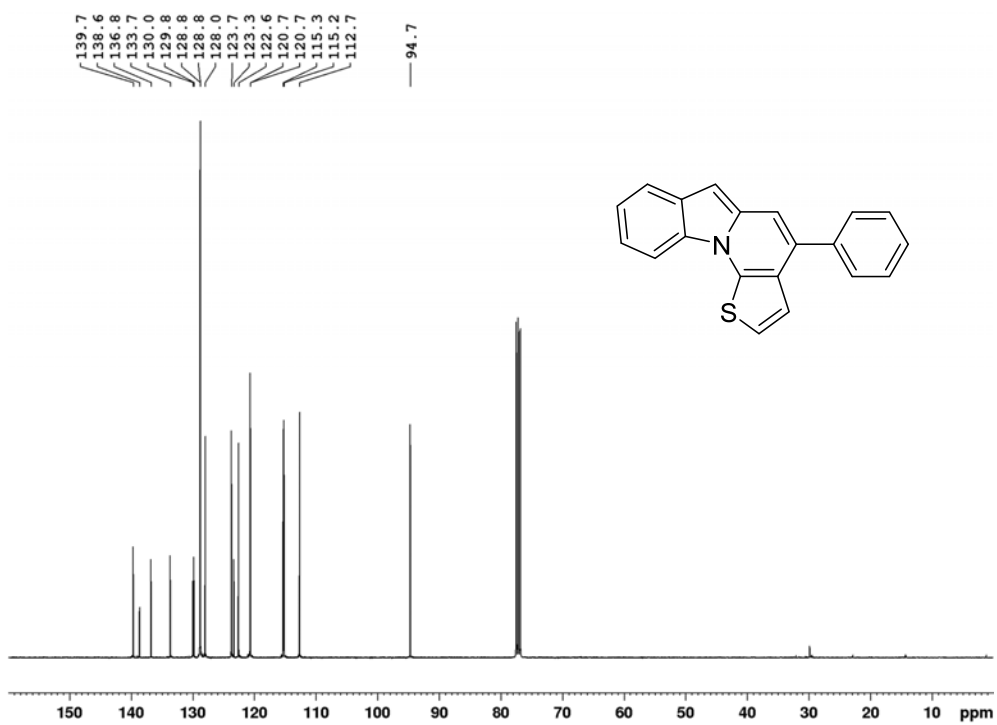

Figure S54.  $^{13}\text{C}\{^1\text{H}\}$  NMR spectrum (101 MHz,  $\text{CDCl}_3$ ) of 2g.

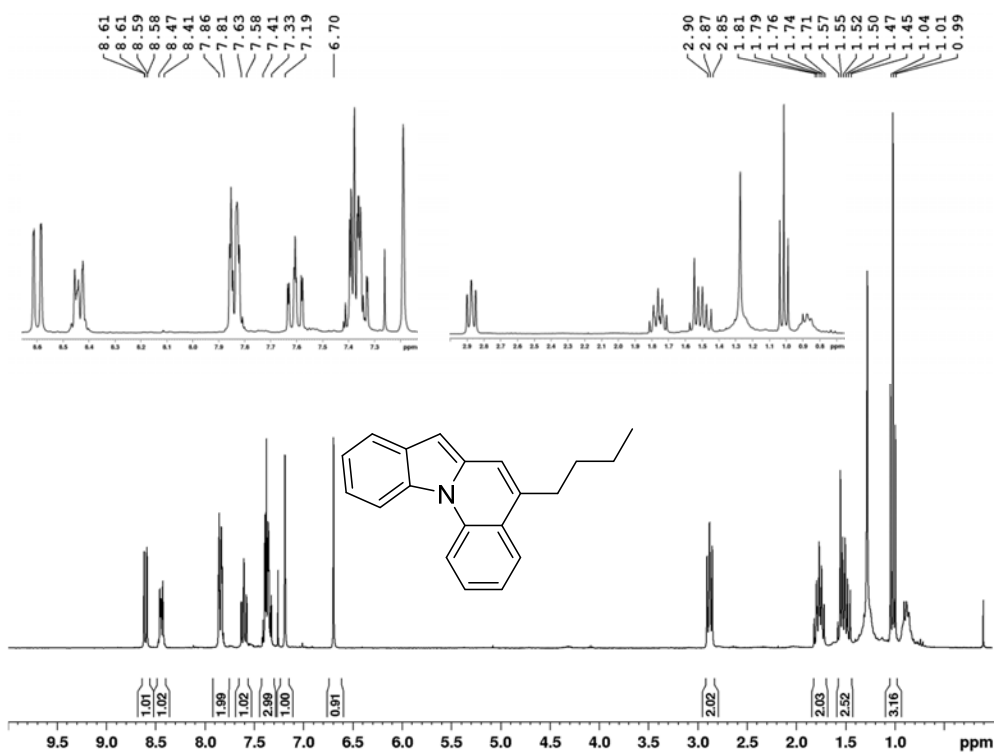

Figure S55.  $^1\text{H}$  NMR spectrum (301 MHz,  $\text{CDCl}_3$ ) of 2h.

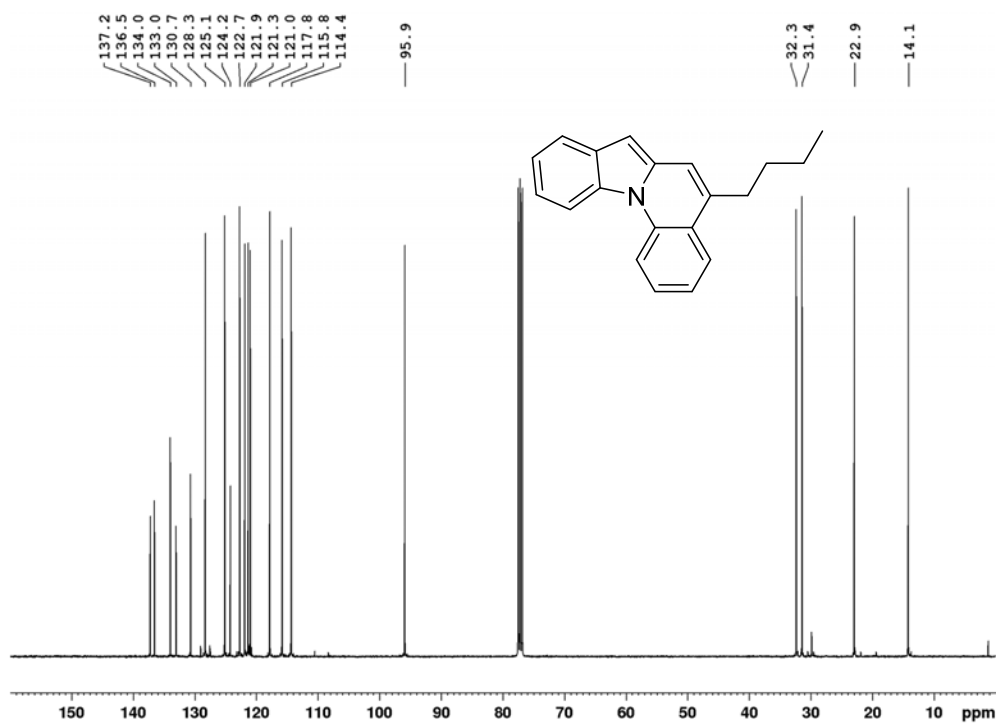

Figure S56.  $^{13}\text{C}\{^1\text{H}\}$  NMR spectrum (101 MHz,  $\text{CDCl}_3$ ) of 2h.

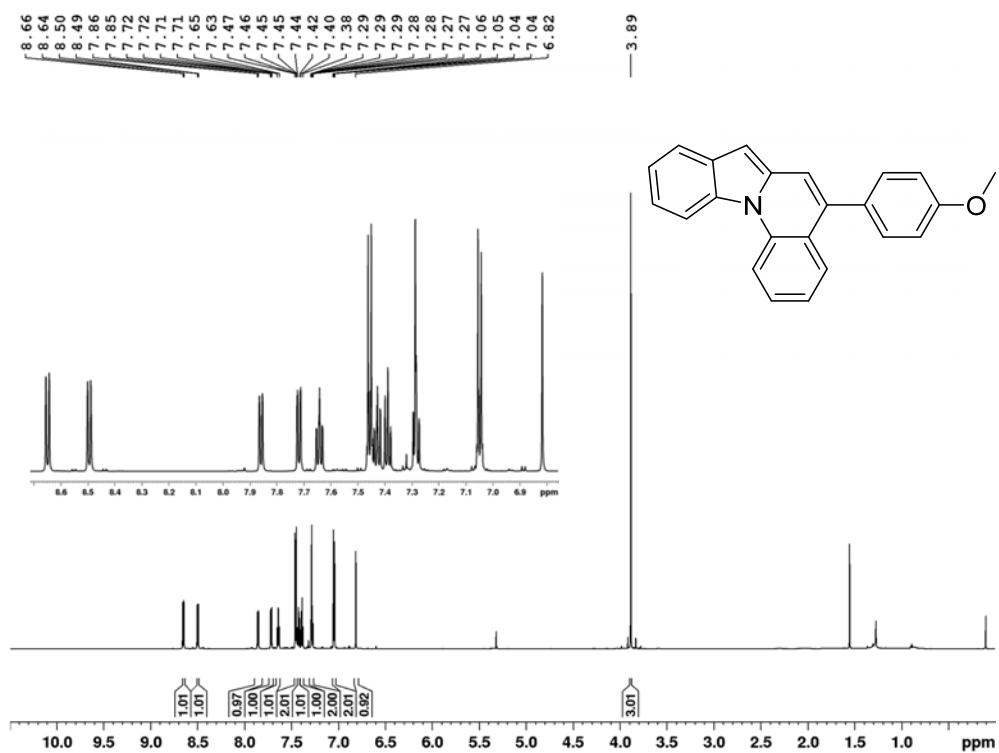

Figure S57.  $^1\text{H}$  NMR spectrum (700 MHz,  $\text{CD}_2\text{Cl}_2$ ) of 2i.



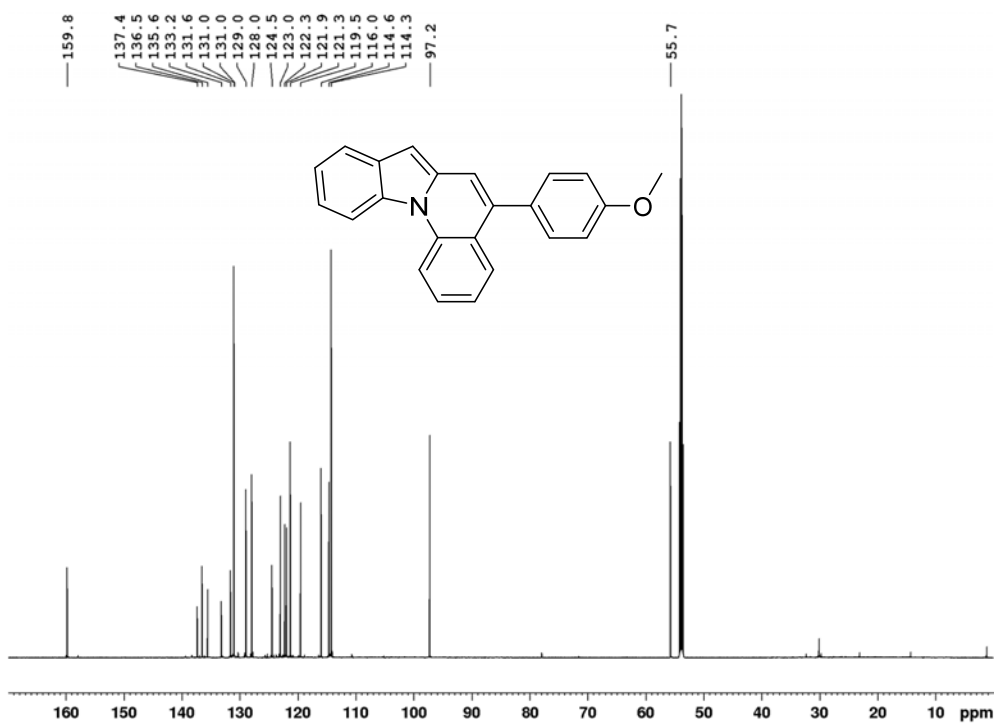

Figure S58. <sup>13</sup>C{<sup>1</sup>H} NMR spectrum (126 MHz, CD<sub>2</sub>Cl<sub>2</sub>) of 2i.

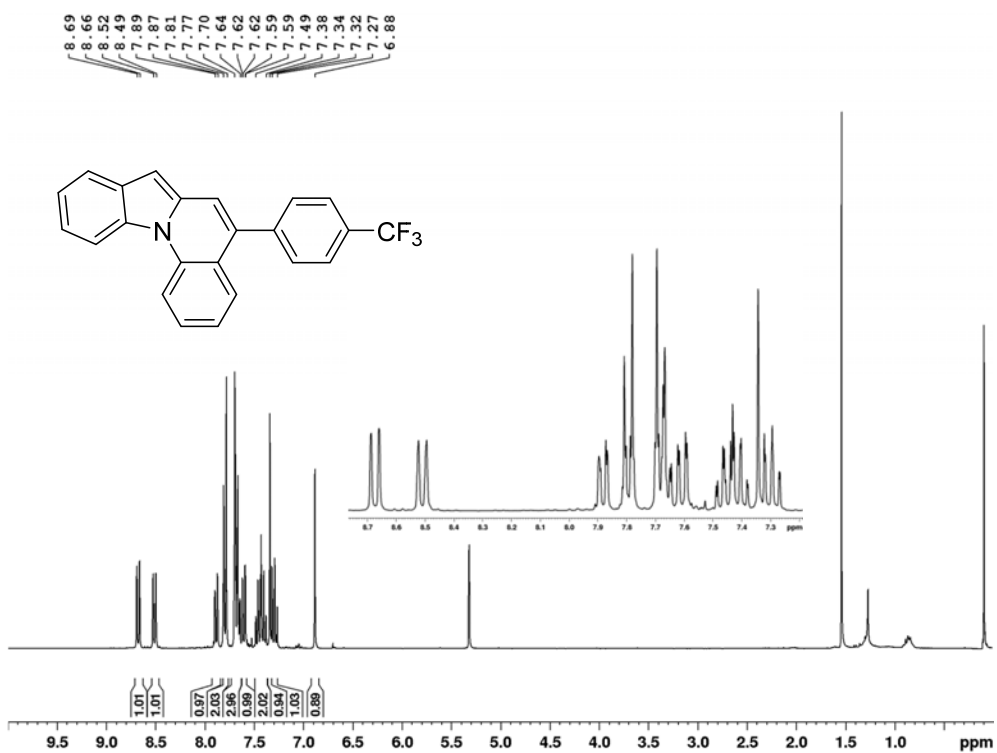

Figure S59. <sup>1</sup>H{<sup>19</sup>F} NMR spectrum (301 MHz, CD<sub>2</sub>Cl<sub>2</sub>) of 2j.

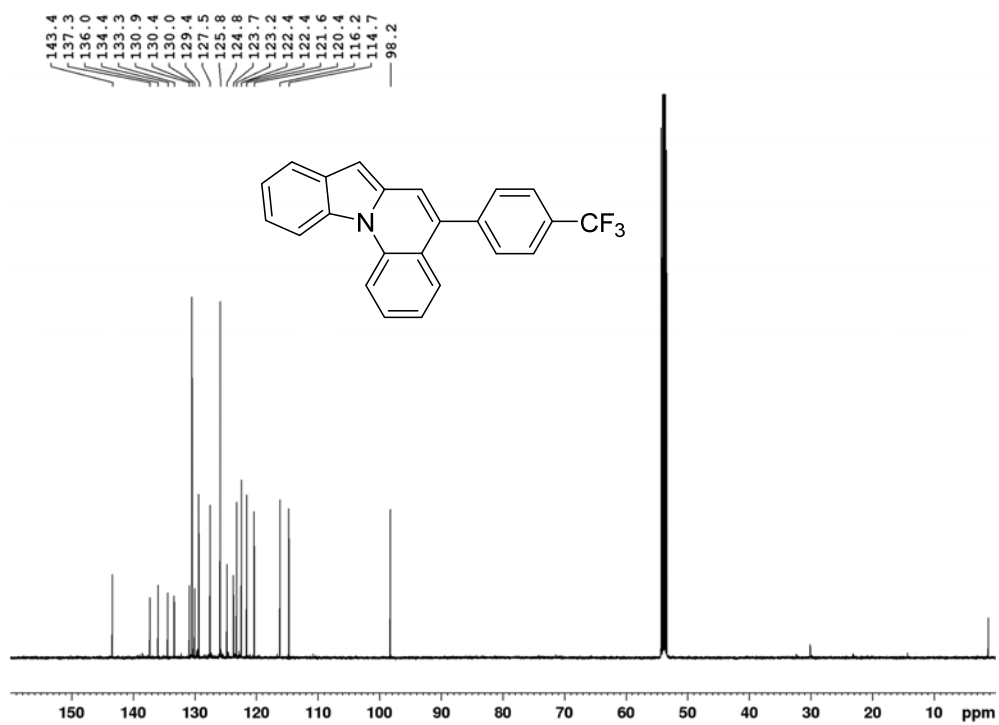

Figure S60.  $^{13}\text{C}\{^1\text{H}, ^{19}\text{F}\}$  NMR spectrum (126 MHz,  $\text{CD}_2\text{Cl}_2$ ) of **2j**.

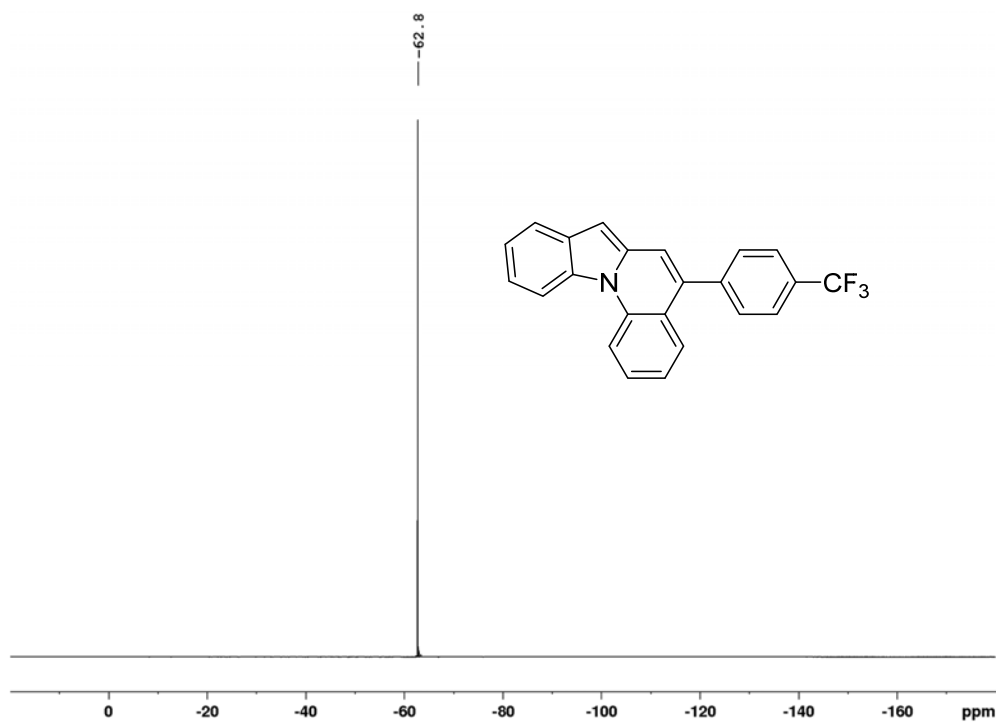

Figure S61.  $^{19}\text{F}\{^1\text{H}\}$  NMR spectrum (283 MHz,  $\text{CD}_2\text{Cl}_2$ ) of **2j**.

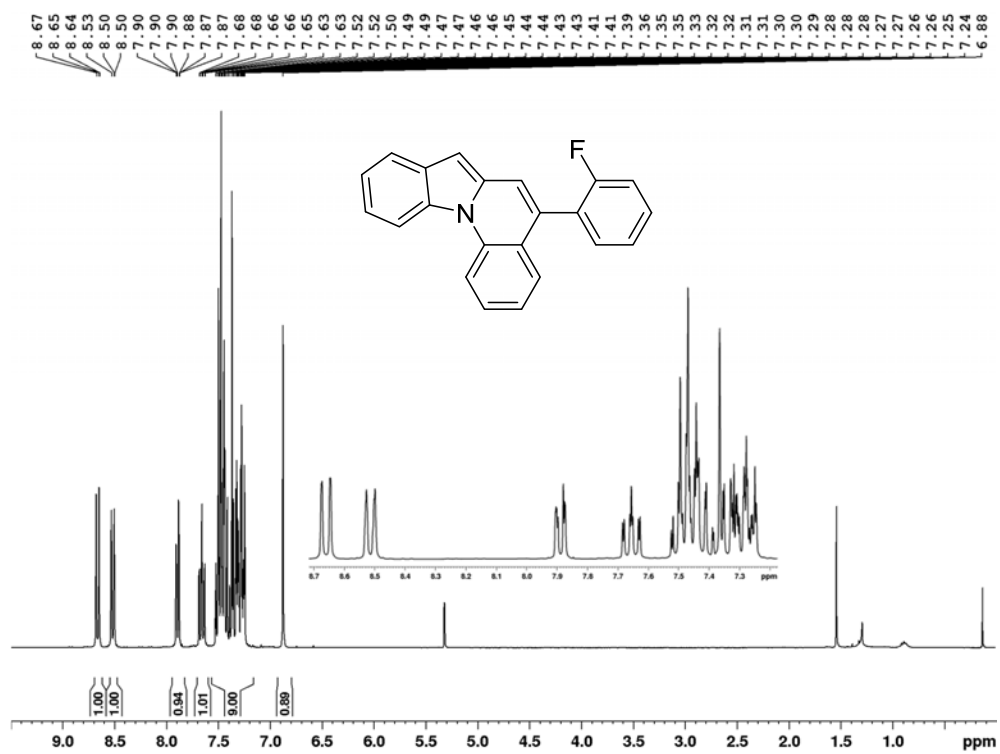

Figure S62.  $^1\text{H}\{^{19}\text{F}\}$  NMR spectrum (301 MHz,  $\text{CD}_2\text{Cl}_2$ ) of 2k.

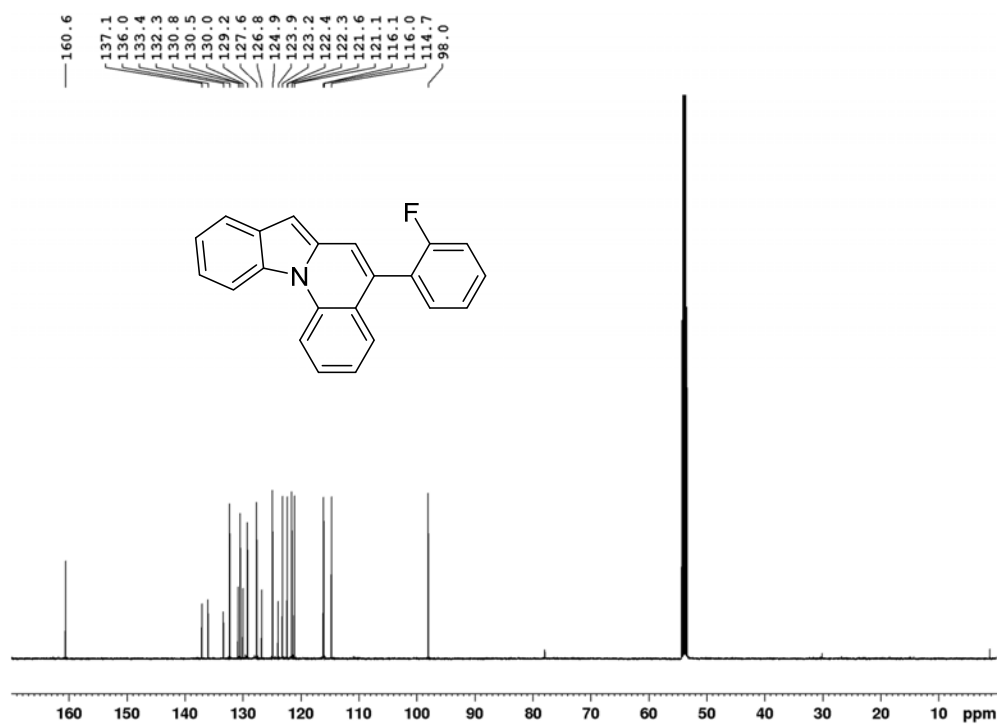

Figure S63.  $^{13}\text{C}\{^1\text{H},^{19}\text{F}\}$  NMR spectrum (126 MHz,  $\text{CD}_2\text{Cl}_2$ ) of 2k.

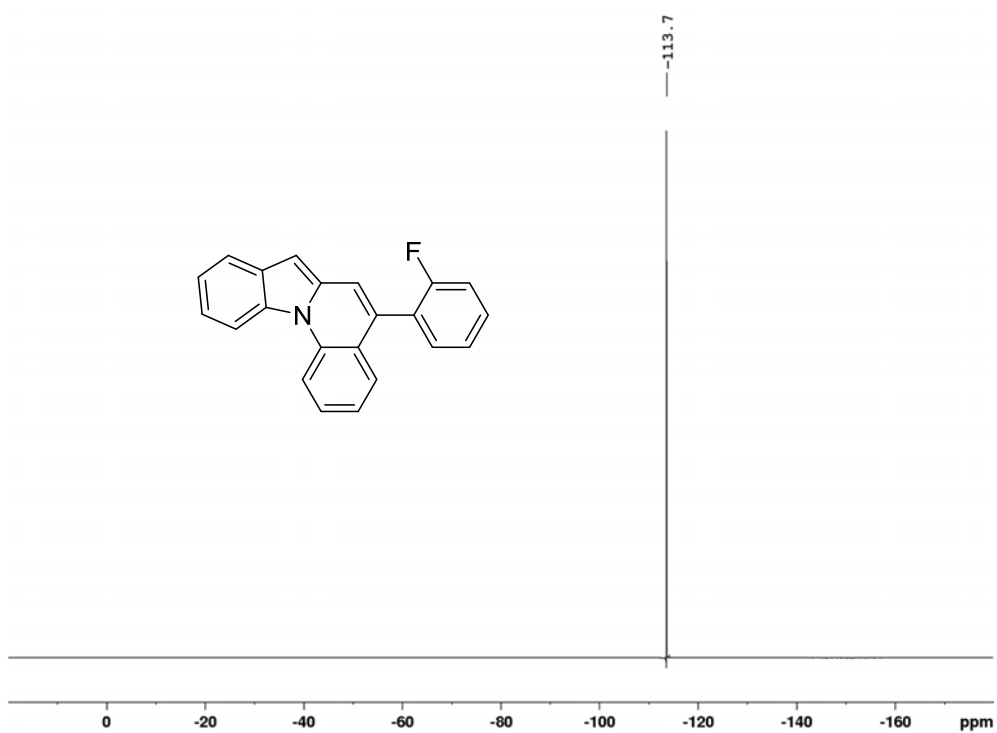

Figure S64.  $^{19}\text{F}\{^1\text{H}\}$  NMR spectrum (283 MHz,  $\text{CD}_2\text{Cl}_2$ ) of 2k.

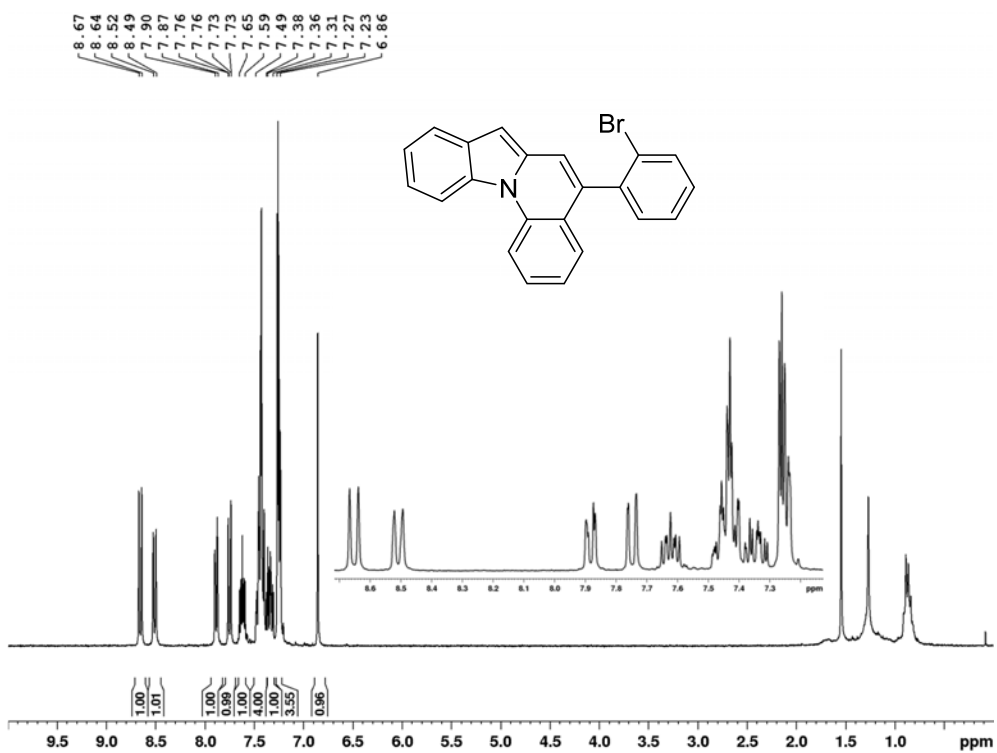

Figure S65.  $^1\text{H}$  NMR spectrum (301 MHz,  $\text{CDCl}_3$ ) of 2l.

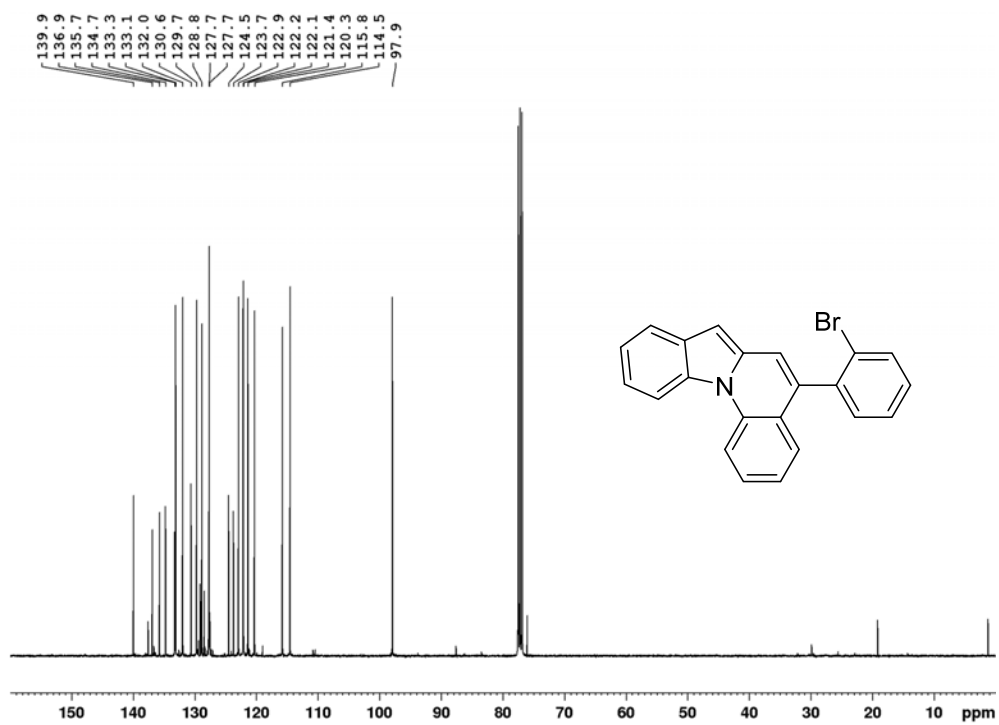

Figure S66.  $^{13}\text{C}\{^1\text{H}\}$  NMR spectrum (101 MHz,  $\text{CDCl}_3$ ) of 2l.

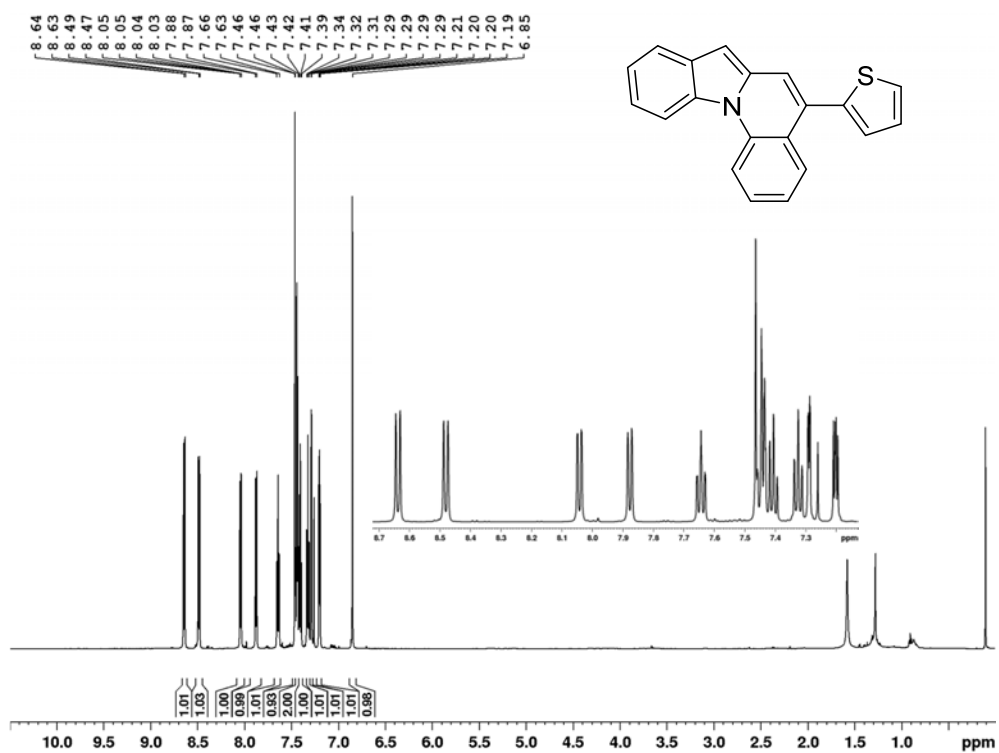

Figure S67.  $^1\text{H}$  NMR spectrum (600 MHz,  $\text{CDCl}_3$ ) of 2m.

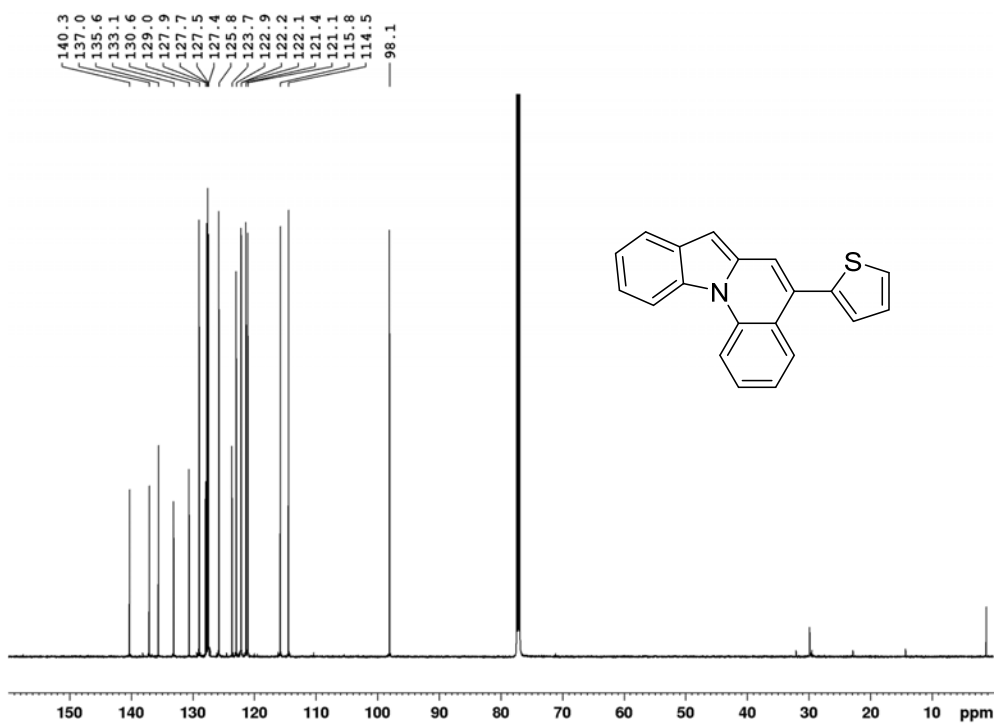

Figure S68.  $^{13}\text{C}\{^1\text{H}\}$  NMR spectrum (151 MHz,  $\text{CDCl}_3$ ) of 2m.

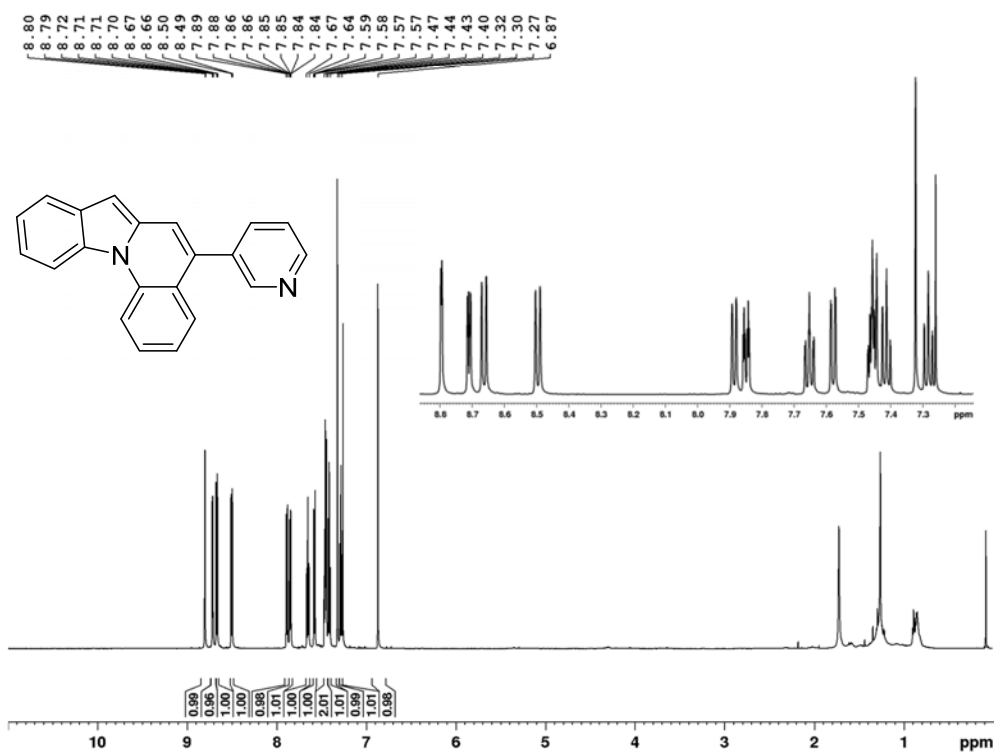

Figure S69.  $^1\text{H}$  NMR spectrum (600 MHz,  $\text{CDCl}_3$ ) of 2n.

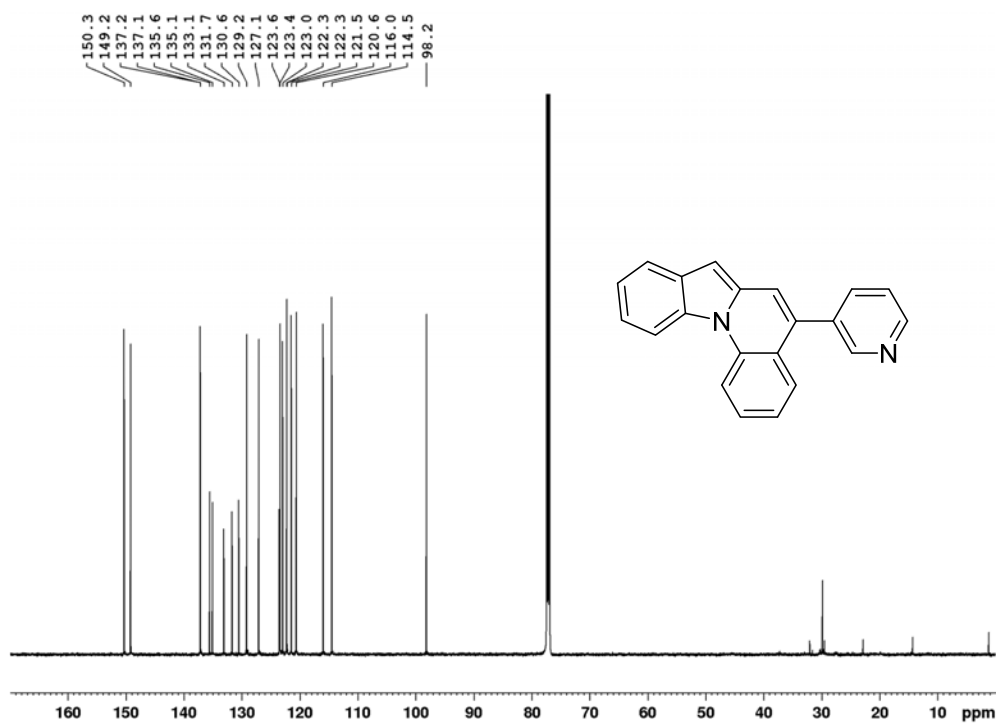

Figure S70.  $^{13}\text{C}\{^1\text{H}\}$  NMR spectrum (151 MHz,  $\text{CDCl}_3$ ) of 2n.

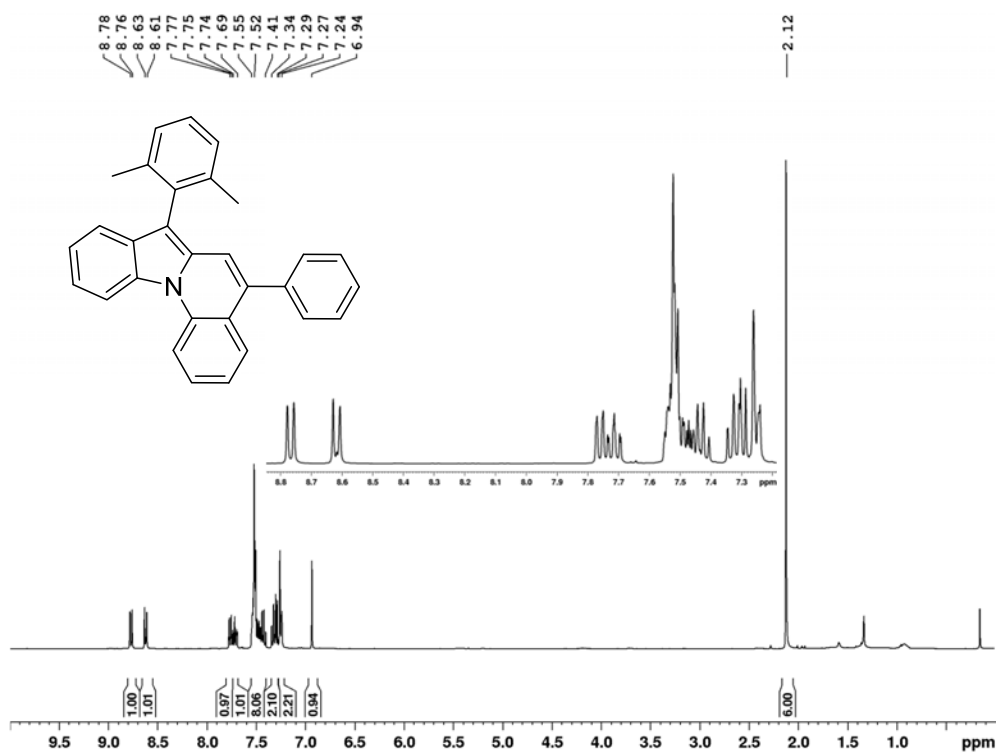

Figure S71.  $^1\text{H}$  NMR spectrum (400 MHz,  $\text{CDCl}_3$ ) of 2o.

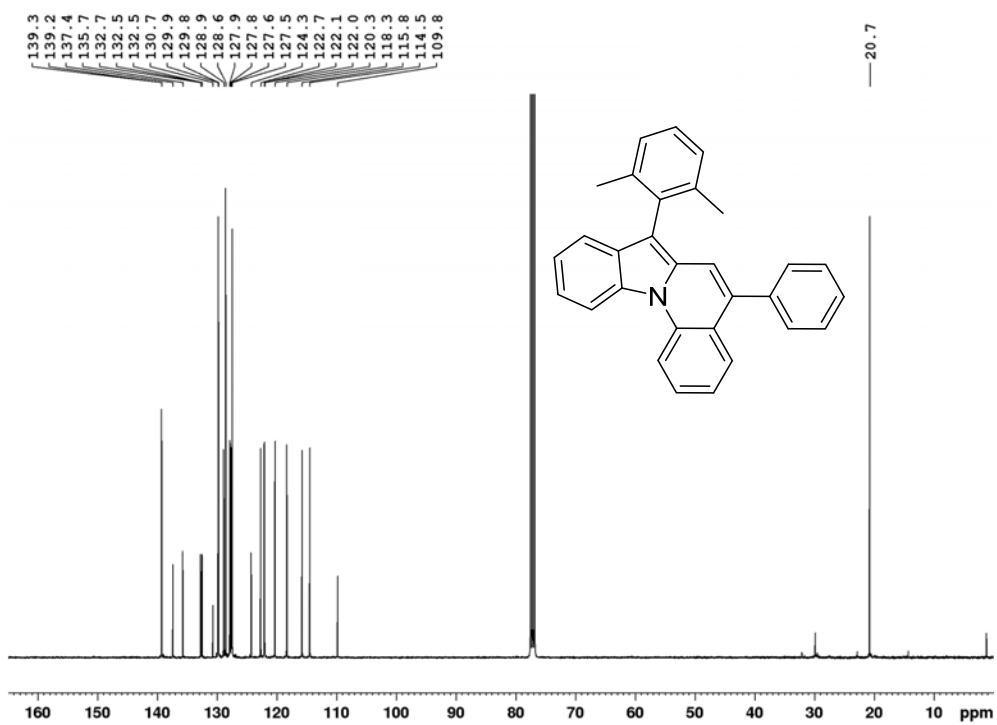

Figure S72.  $^{13}\text{C}\{^1\text{H}\}$  NMR spectrum (101 MHz,  $\text{CDCl}_3$ ) of **2o**.

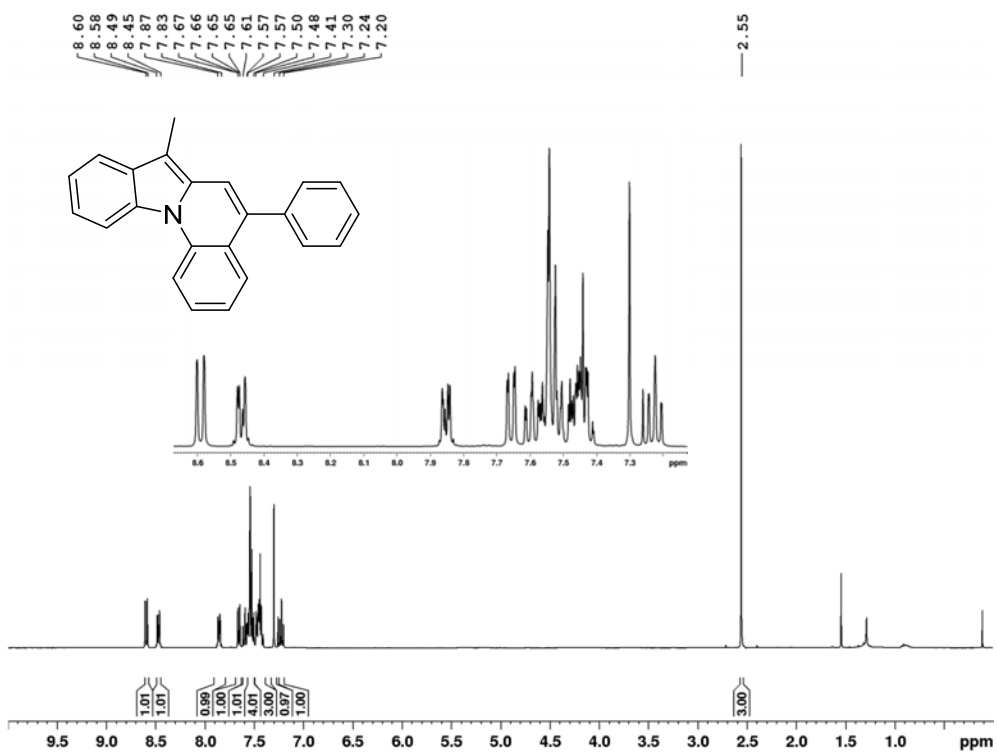

Figure S73.  $^1\text{H}$  NMR spectrum (400 MHz,  $\text{CDCl}_3$ ) of **2p**.



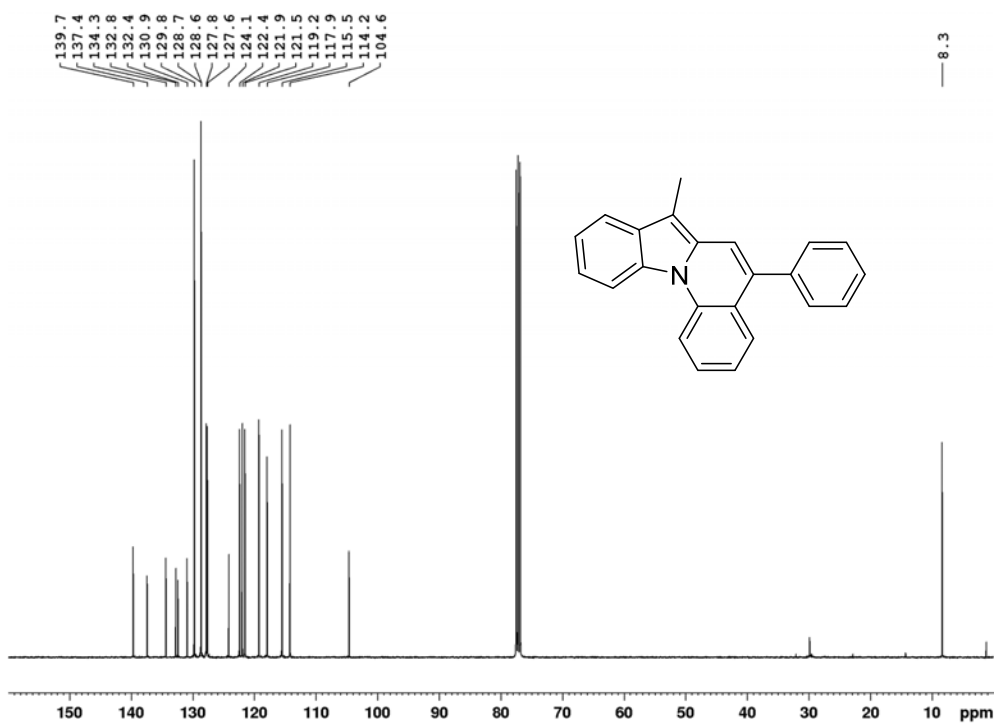

Figure S74.  $^{13}\text{C}\{^1\text{H}\}$  NMR spectrum (101 MHz,  $\text{CDCl}_3$ ) of 2p.

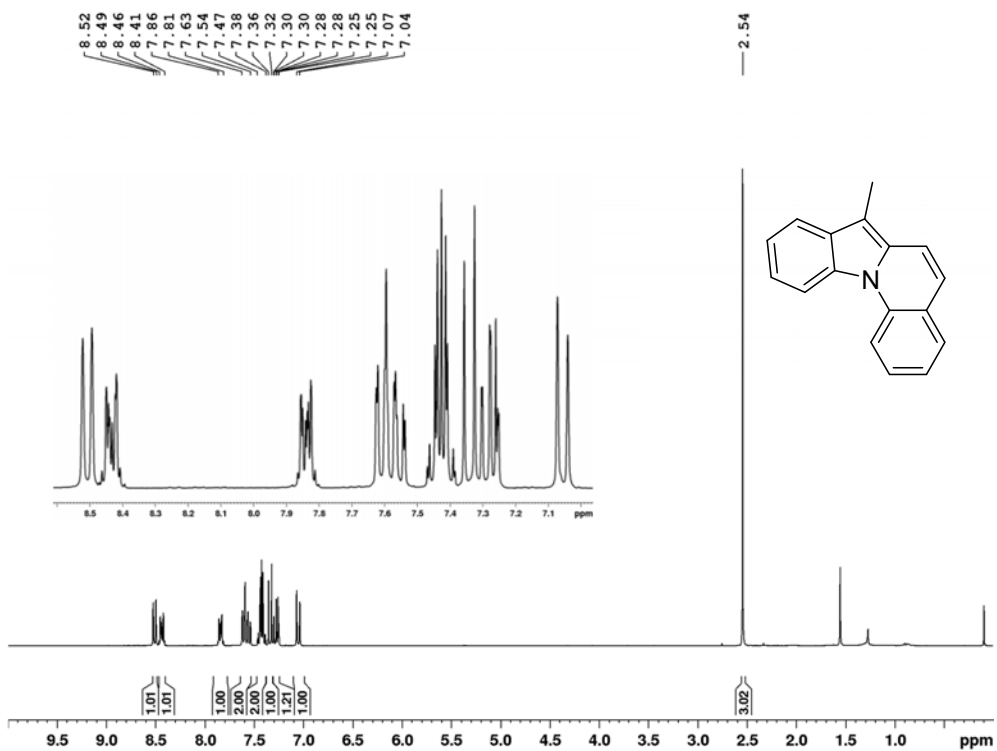

Figure S75.  $^1\text{H}$  NMR spectrum (301 MHz,  $\text{CDCl}_3$ ) of 2q.

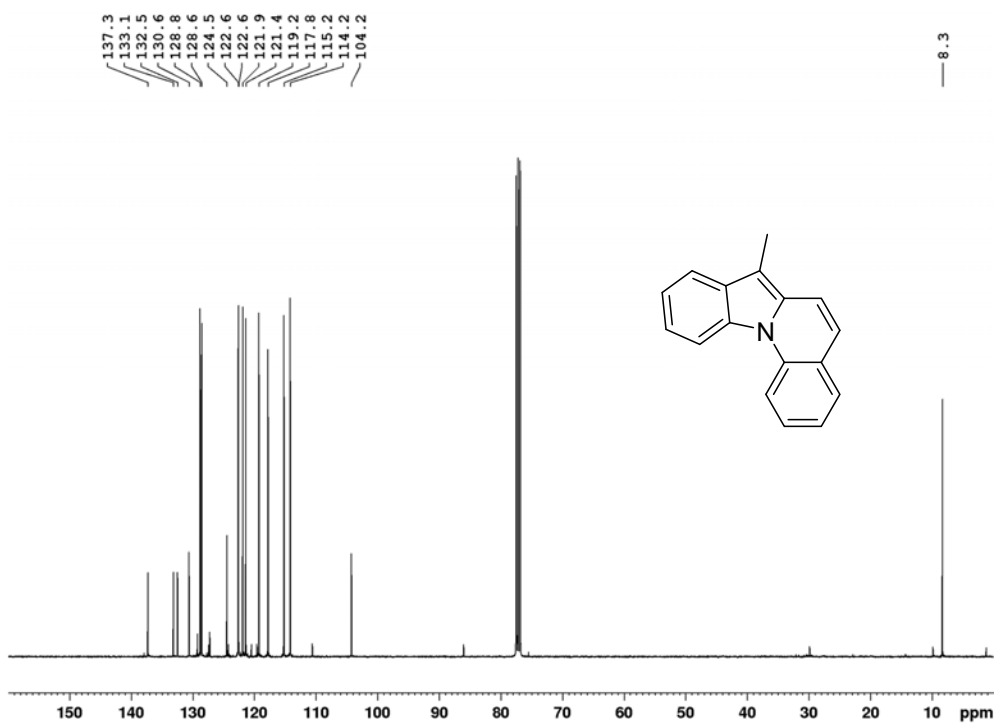

Figure S76. <sup>13</sup>C{<sup>1</sup>H} NMR spectrum (101 MHz, CDCl<sub>3</sub>) of 2q.

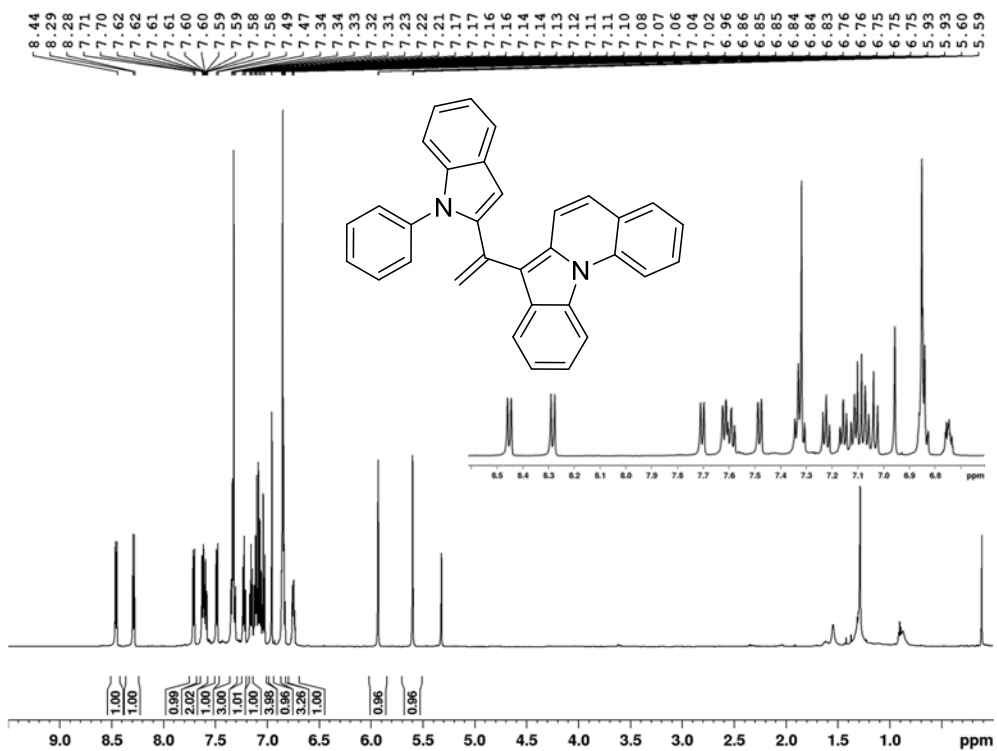

Figure S77. <sup>1</sup>H NMR spectrum (600 MHz, CD<sub>2</sub>Cl<sub>2</sub>) of 4.

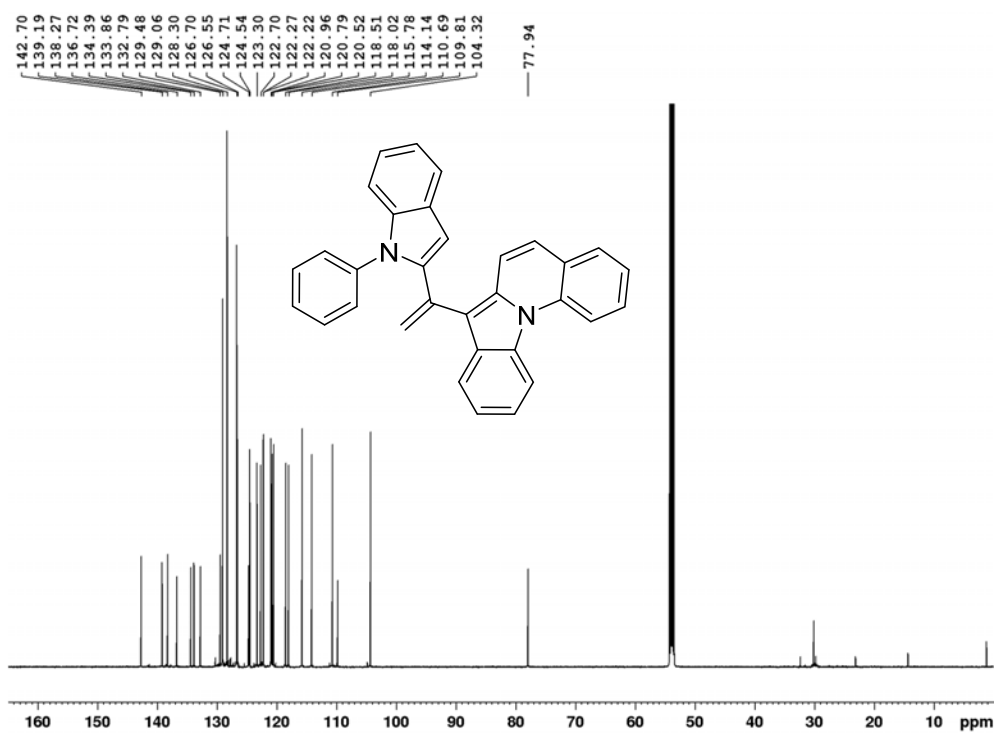

Figure S78.  $^{13}\text{C}\{^1\text{H}\}$  NMR spectrum (151 MHz,  $\text{CD}_2\text{Cl}_2$ ) of 4.

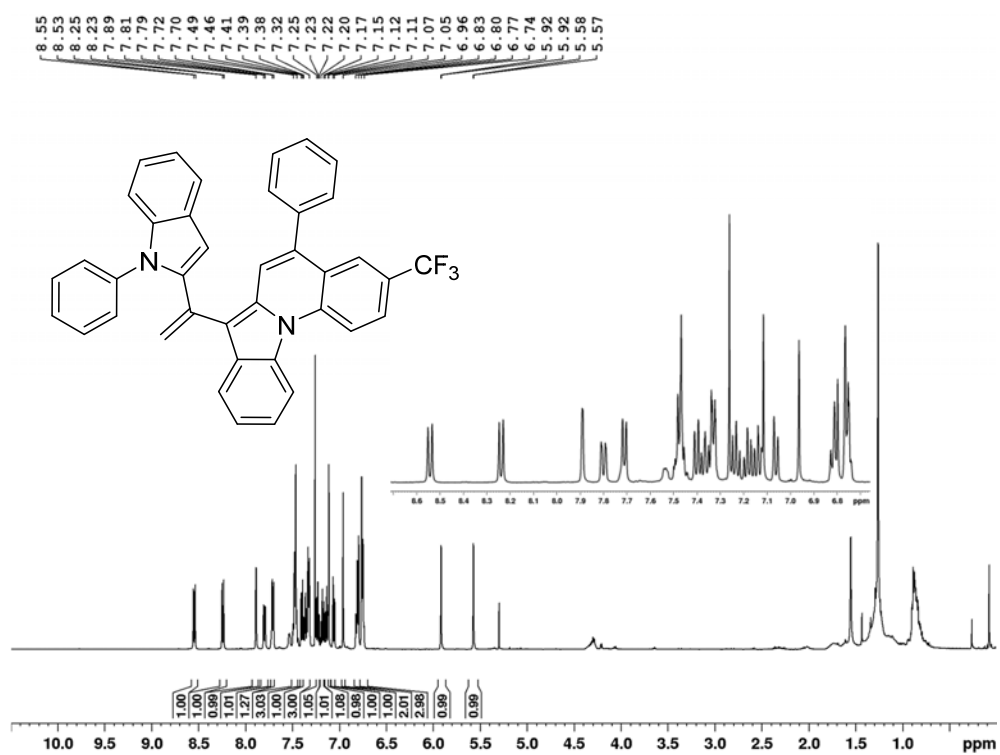

Figure S79.  $^1\text{H}\{^{19}\text{F}\}$  NMR spectrum (500 MHz,  $\text{CDCl}_3$ ) of 5.

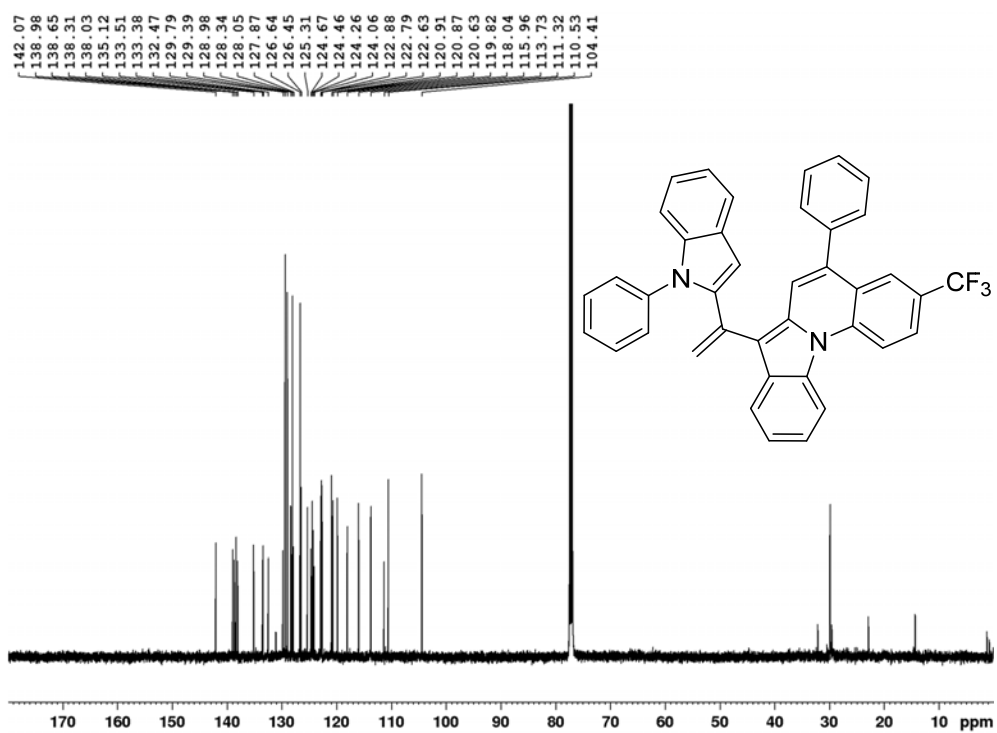

Figure S80.  $^{13}\text{C}\{^1\text{H}, ^{19}\text{F}\}$  NMR spectrum (126 MHz,  $\text{CDCl}_3$ ) of **5**.

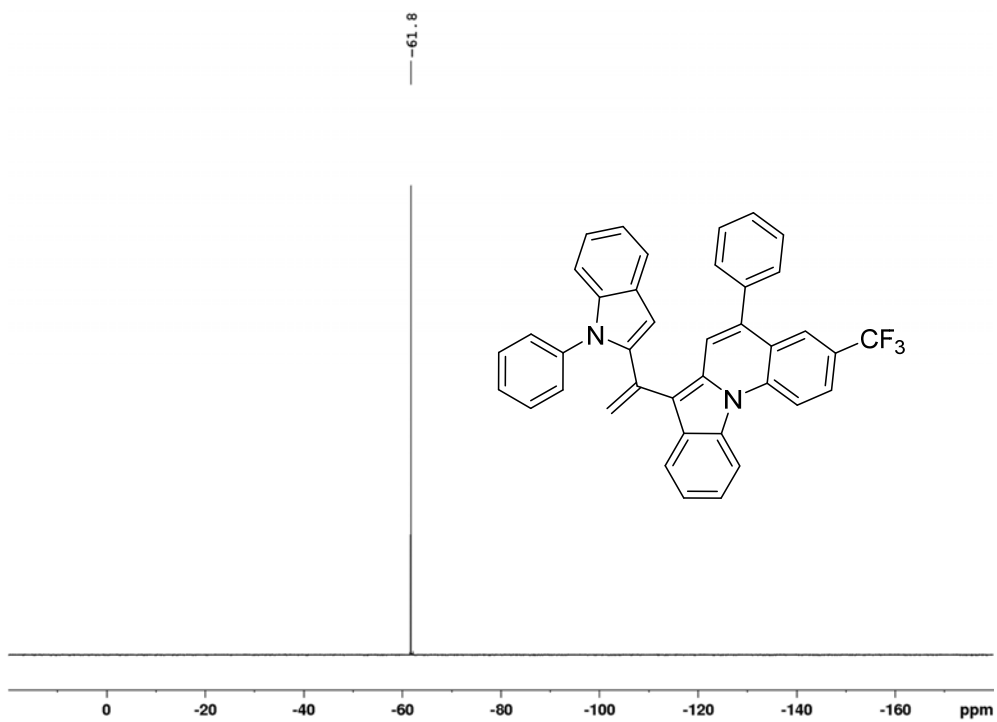

Figure S81.  $^{19}\text{F}\{^1\text{H}\}$  NMR spectrum (471 MHz,  $\text{CDCl}_3$ ) of **5**.

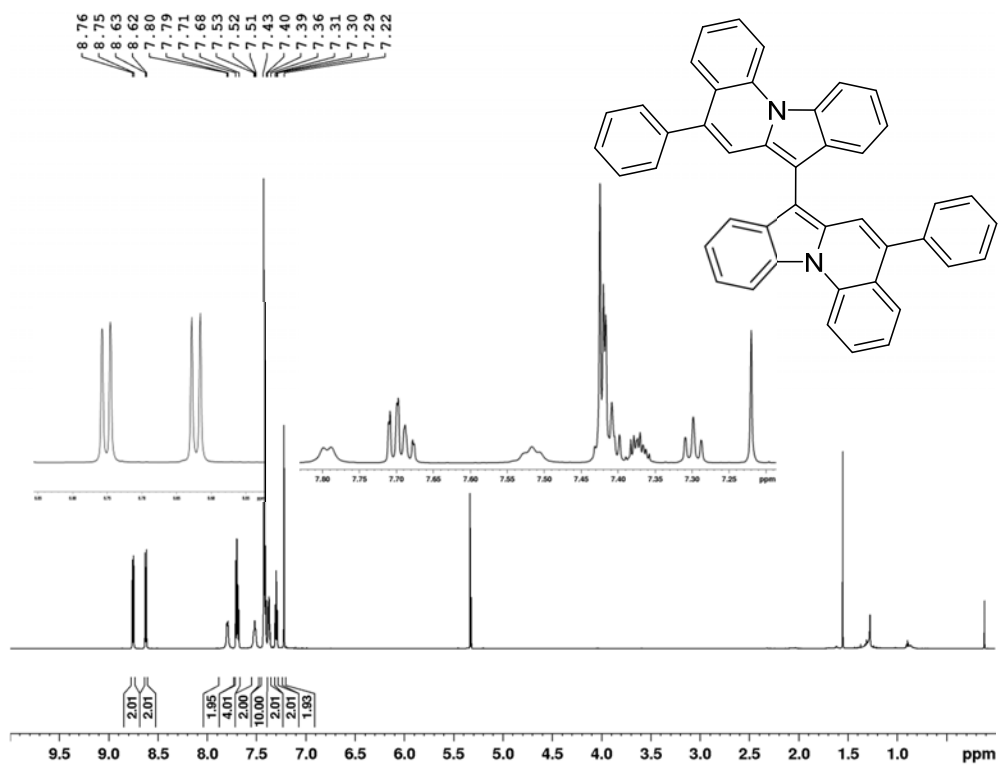

Figure S82. <sup>1</sup>H NMR spectrum (700 MHz, CD<sub>2</sub>Cl<sub>2</sub>) of 6.

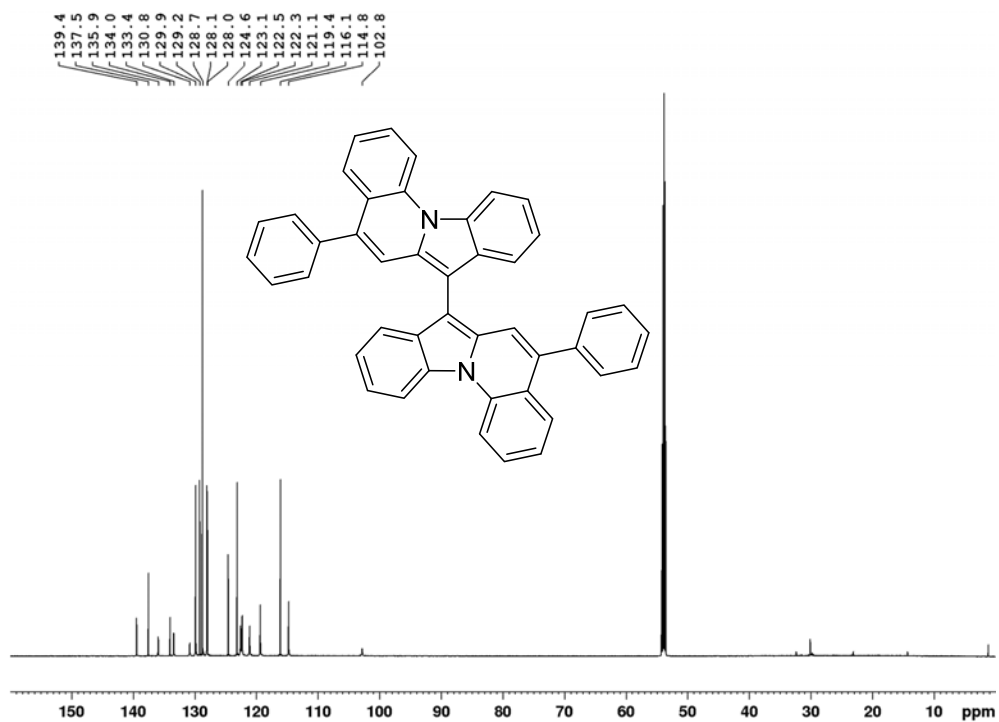

Figure S83. <sup>13</sup>C{<sup>1</sup>H} NMR spectrum (176 MHz, CD<sub>2</sub>Cl<sub>2</sub>) of 6.

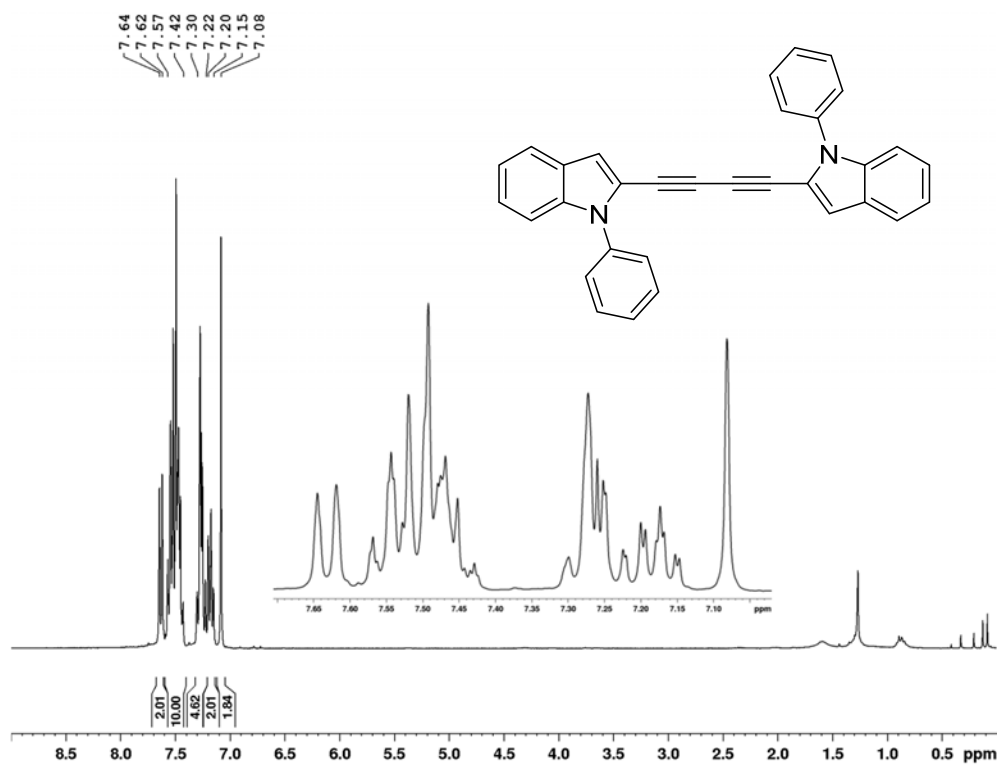

Figure S84. <sup>1</sup>H NMR spectrum (301 MHz, CDCl<sub>3</sub>) of 7.

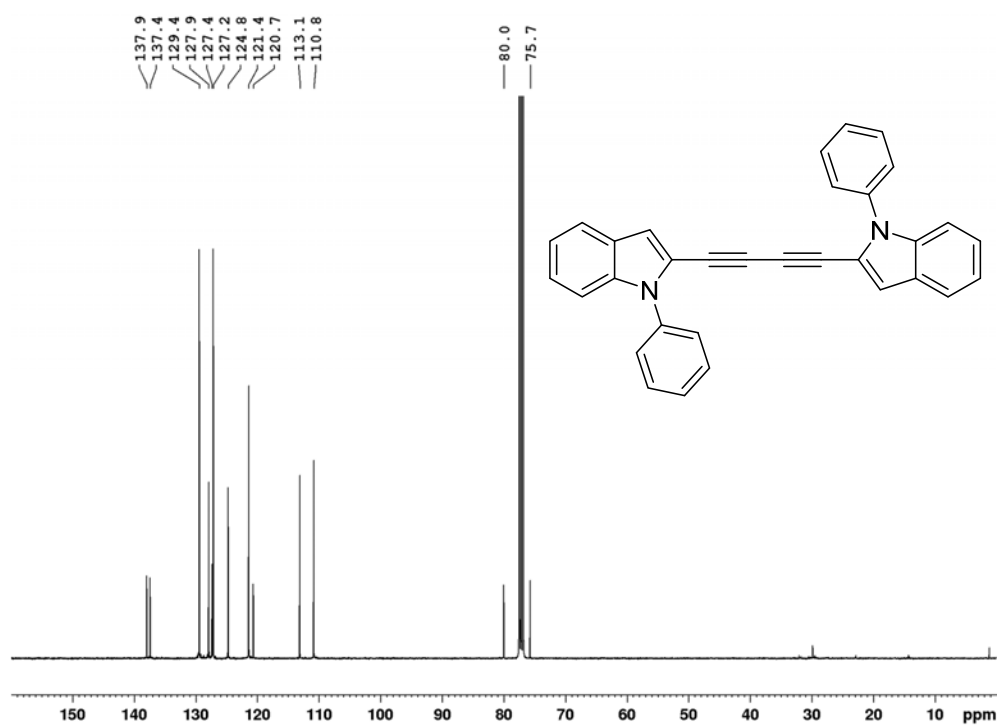

Figure S85. <sup>13</sup>C{<sup>1</sup>H} NMR spectrum (101 MHz, CDCl<sub>3</sub>) of 7.

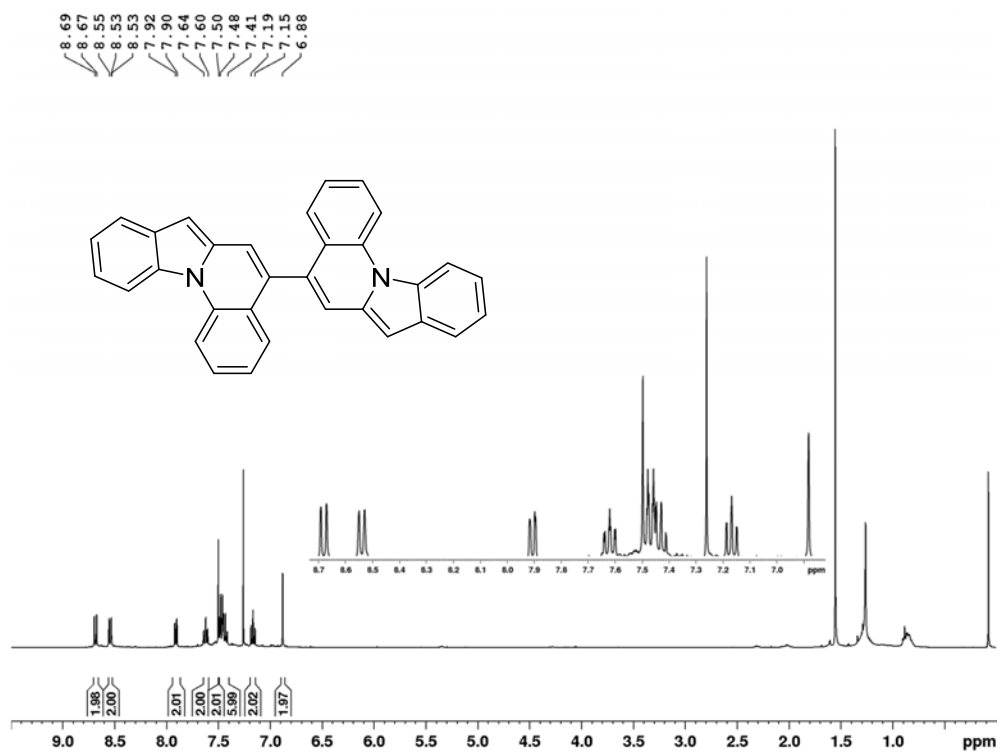

Figure S86. <sup>1</sup>H NMR spectrum (400 MHz, CDCl<sub>3</sub>) of **8**.

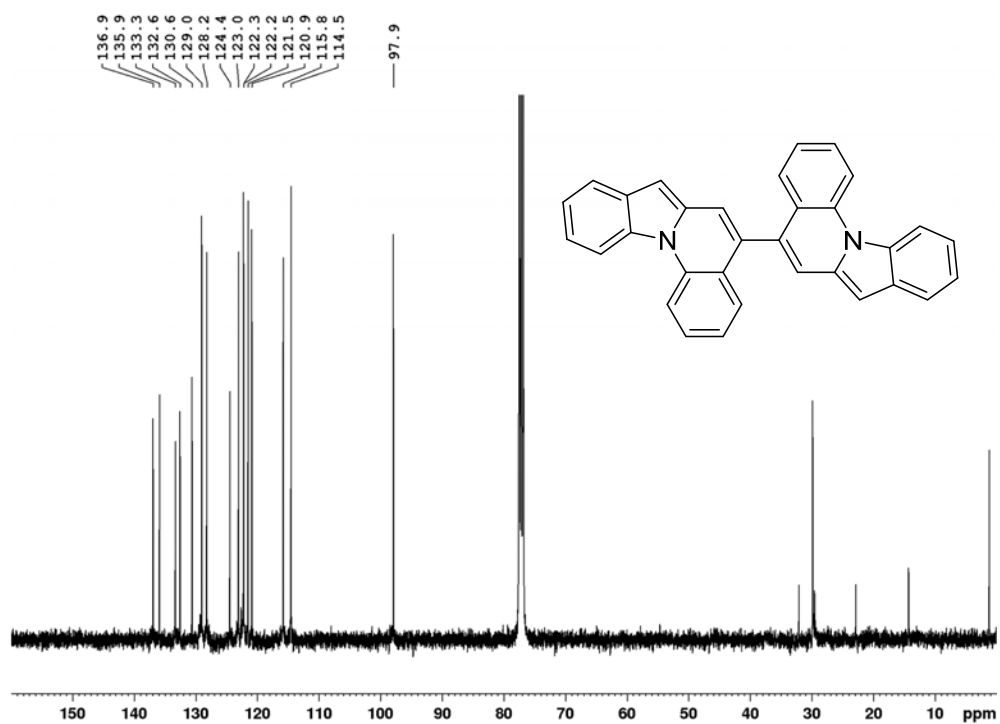

Figure S87. <sup>13</sup>C{<sup>1</sup>H} NMR spectrum (101 MHz, CDCl<sub>3</sub>) of **8**.

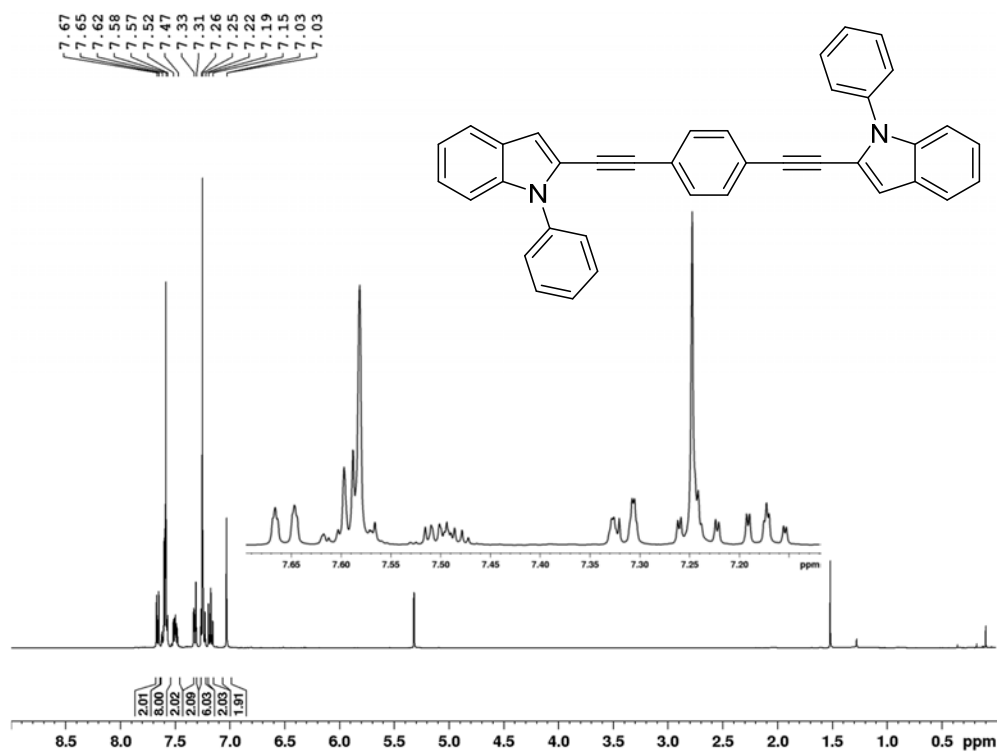

Figure S88. <sup>1</sup>H NMR spectrum (400 MHz, CD<sub>2</sub>Cl<sub>2</sub>) of 9.

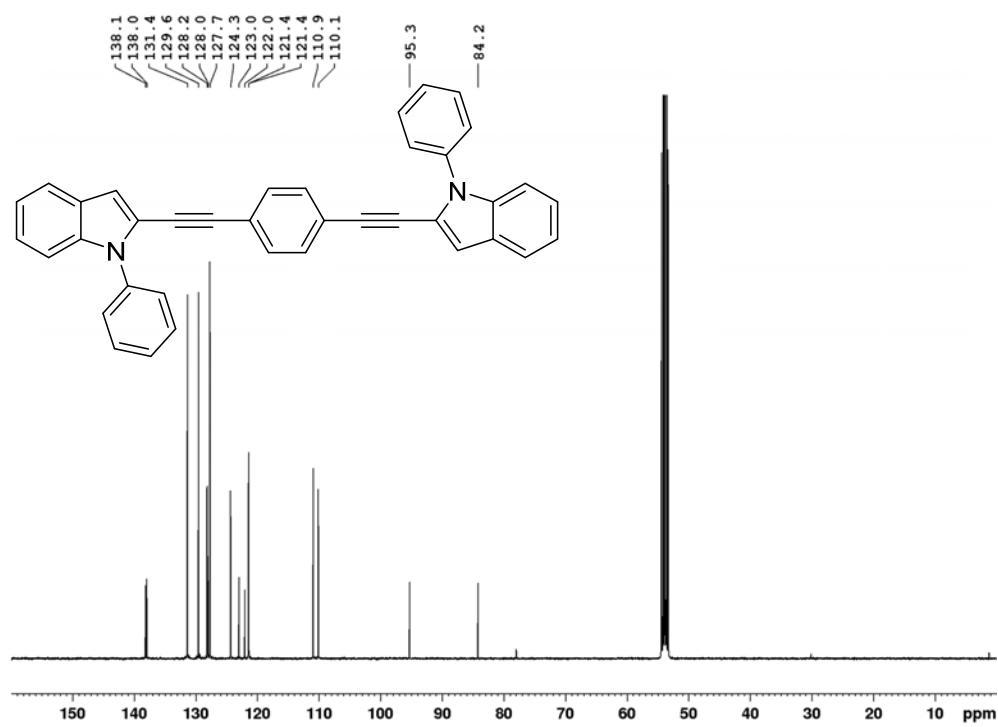

Figure S89. <sup>13</sup>C{<sup>1</sup>H} NMR spectrum (101 MHz, CD<sub>2</sub>Cl<sub>2</sub>) of 9.



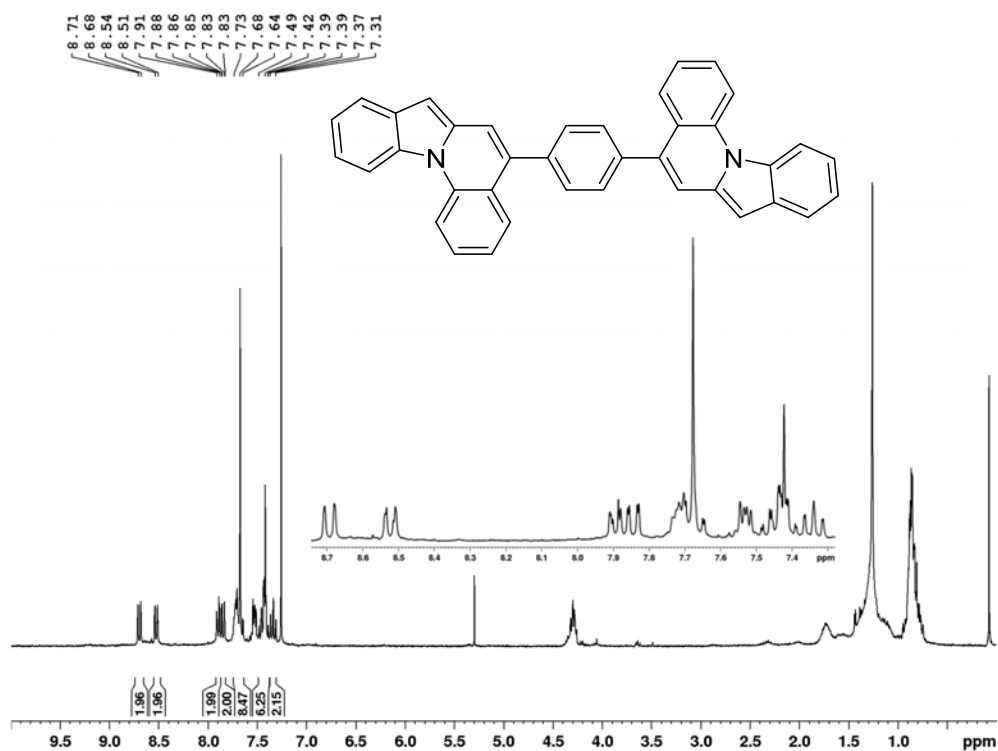

Figure S90. <sup>1</sup>H NMR spectrum (301 MHz, CDCl<sub>3</sub>) of 10.

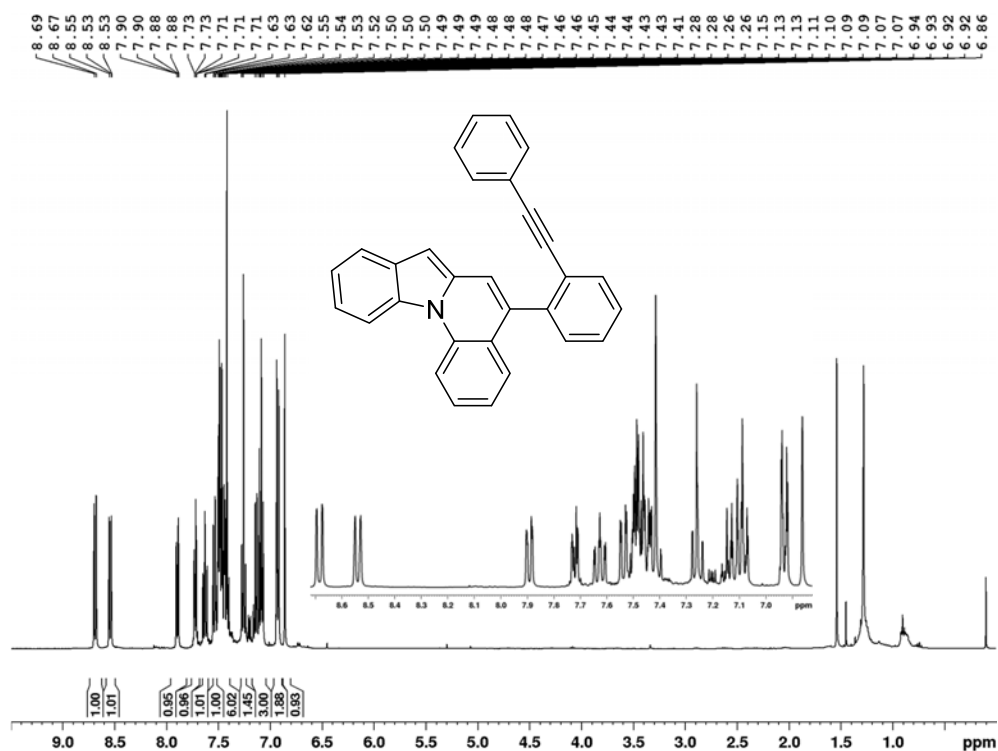

Figure S91. <sup>1</sup>H NMR spectrum (400 MHz, CDCl<sub>3</sub>) of 11.

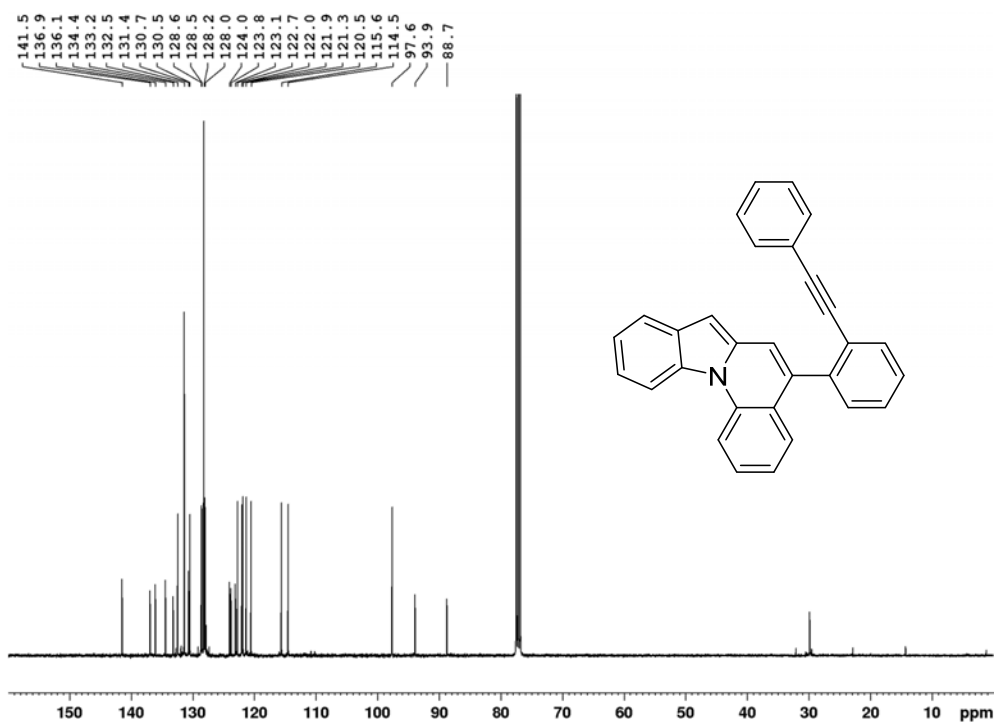

Figure S92.  $^{13}\text{C}\{^1\text{H}\}$  NMR spectrum (101 MHz,  $\text{CDCl}_3$ ) of **11**.

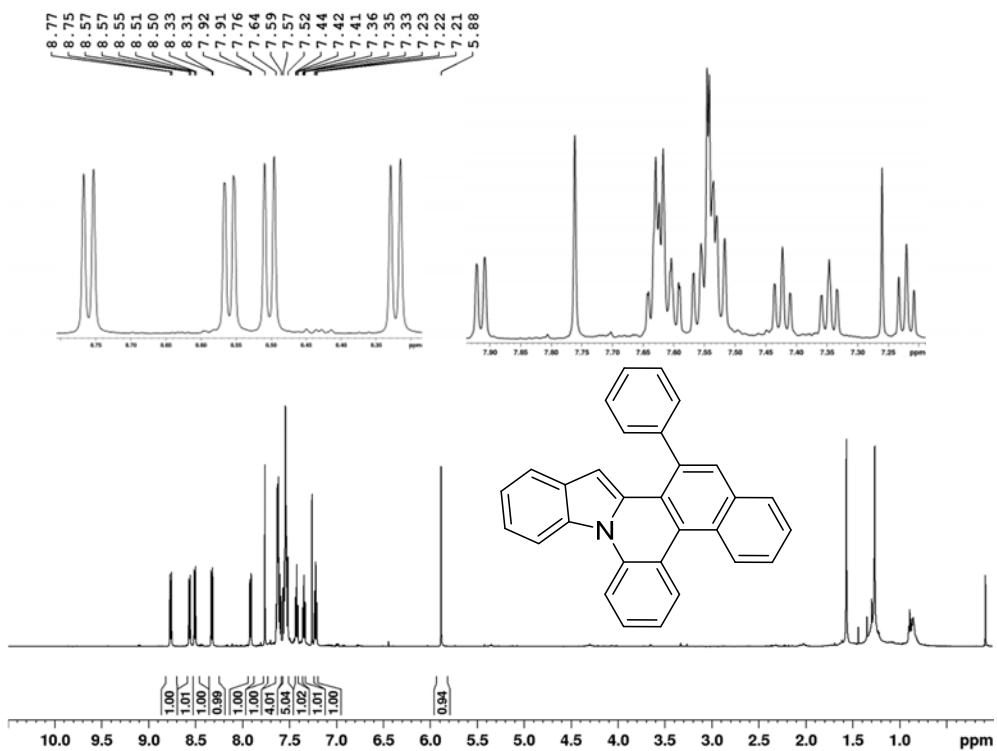

Figure S93.  $^1\text{H}$  NMR spectrum (600 MHz,  $\text{CDCl}_3$ ) of **12**.

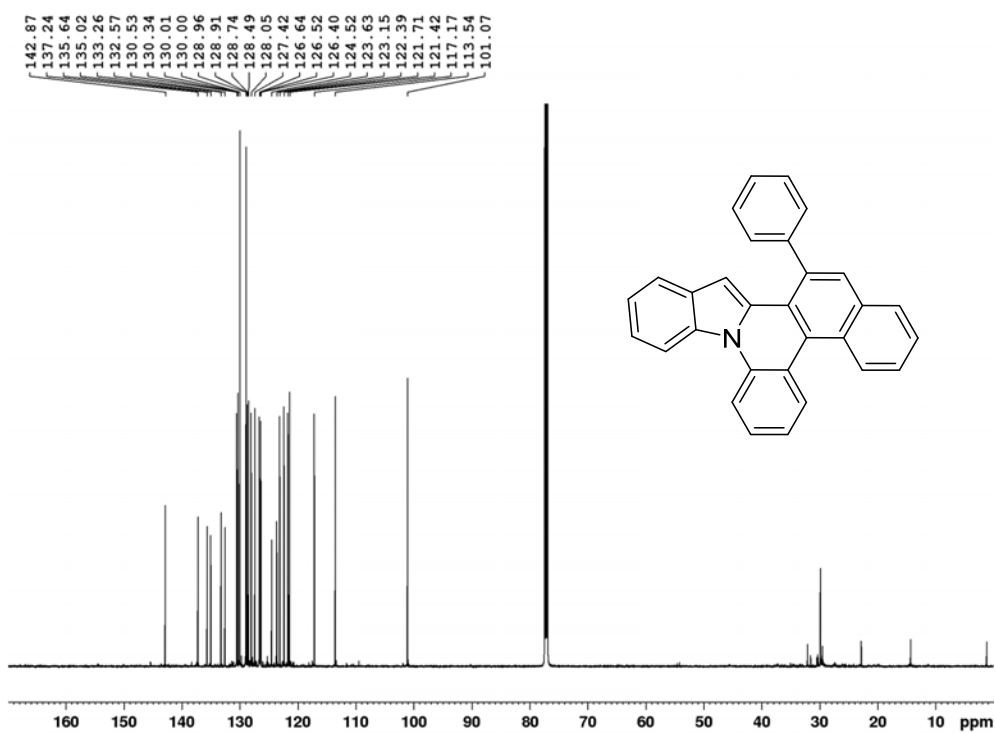

Figure S94.  $^{13}\text{C}\{^1\text{H}\}$  NMR spectrum (151 MHz,  $\text{CDCl}_3$ ) of 12.

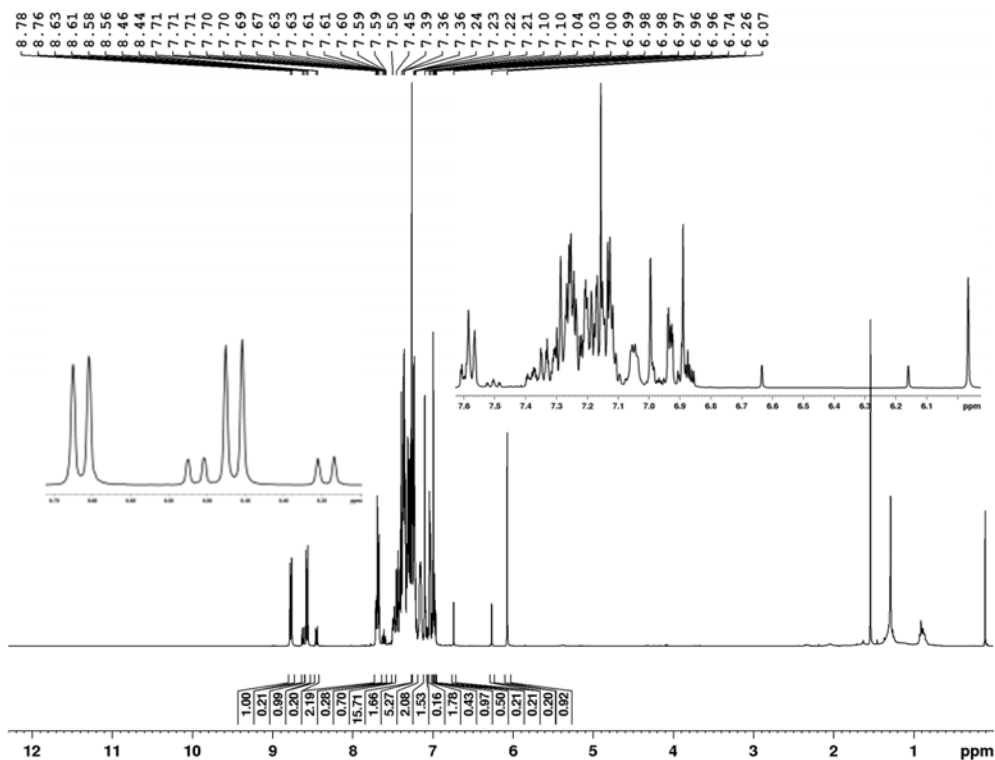

Figure S95.  $^1\text{H}$  NMR spectrum (400 MHz,  $\text{CDCl}_3$ ) of 3a/3c.

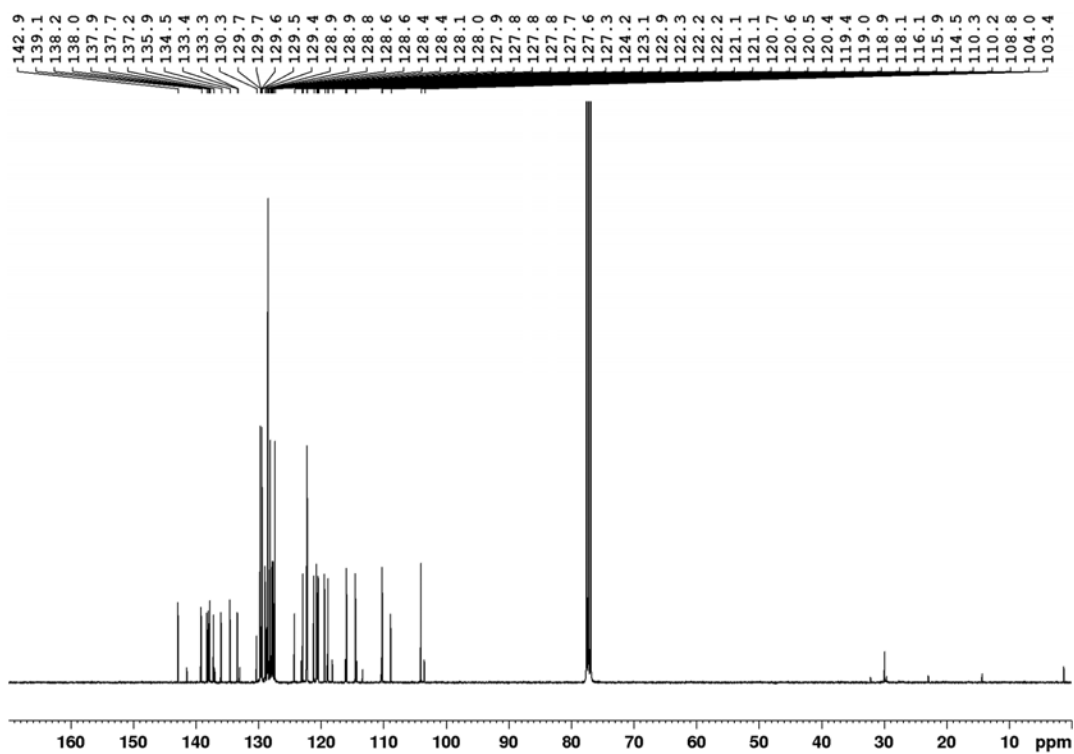

Figure S96.  $^{13}\text{C}\{^1\text{H}\}$  NMR spectrum (101 MHz,  $\text{CDCl}_3$ ) of 3a/3c.

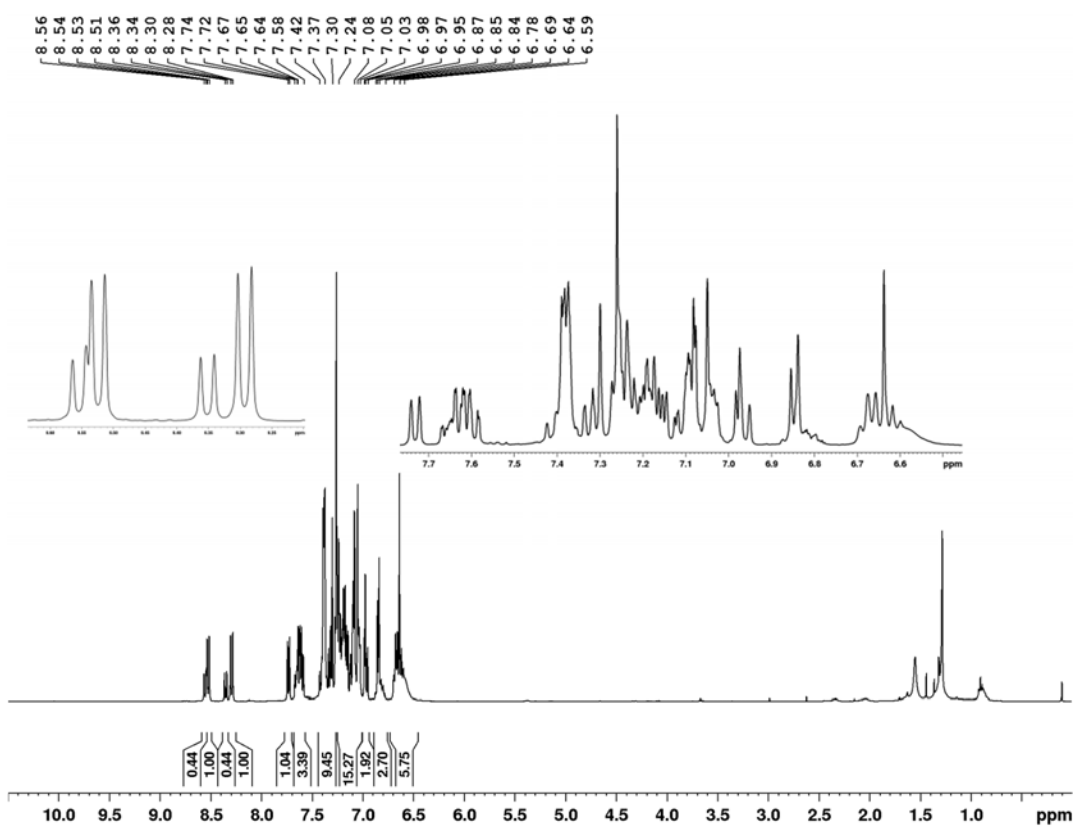

Figure S97.  $^1\text{H}$  NMR spectrum (400 MHz,  $\text{CDCl}_3$ ) of 3b/3d.

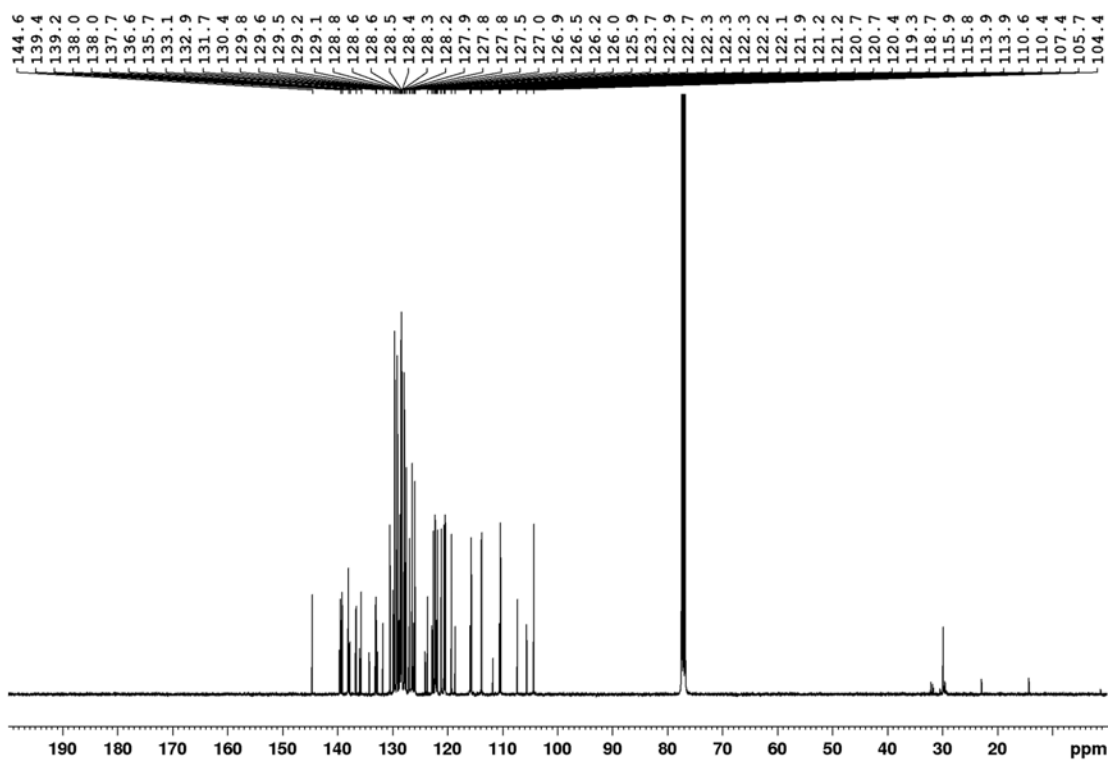

Figure S98.  $^{13}\text{C}\{^1\text{H}\}$  NMR spectrum (101 MHz,  $\text{CDCl}_3$ ) of **3b/3d**.

### 3 UV-Vis and Fluorescence Spectra

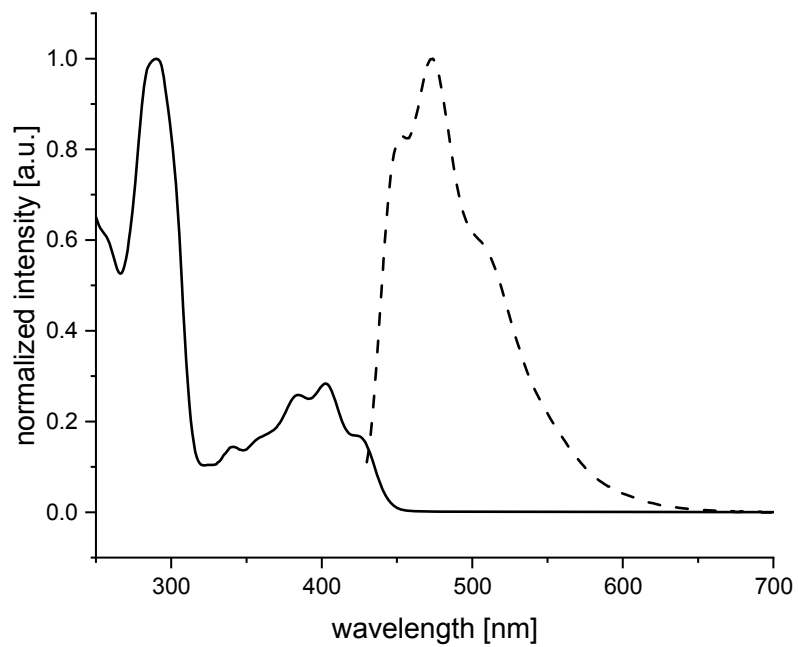

**Figure S99.** Absorption (solid line) and emission (dashed line) spectra of **2a** in DCM.

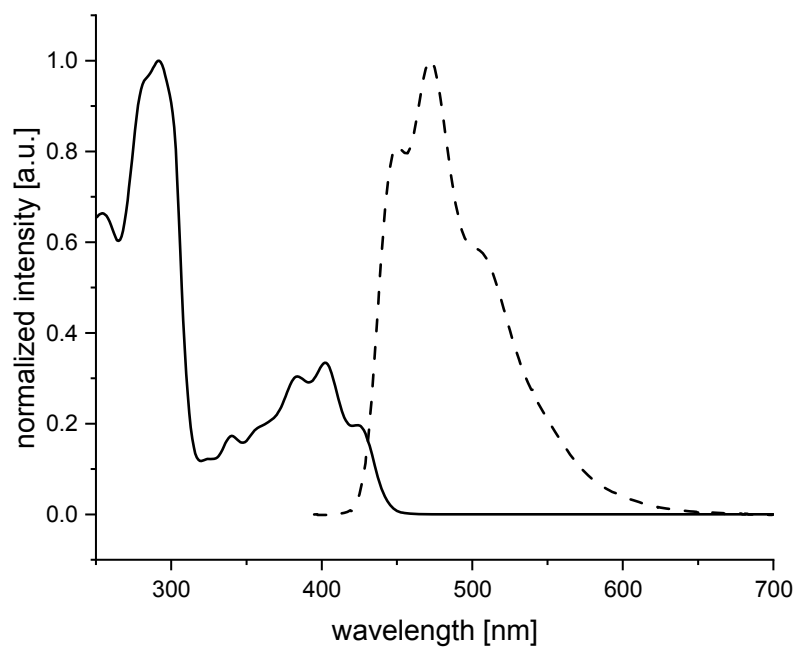

**Figure S100.** Absorption (solid line) and emission (dashed line) spectra of **2a** in dioxane.

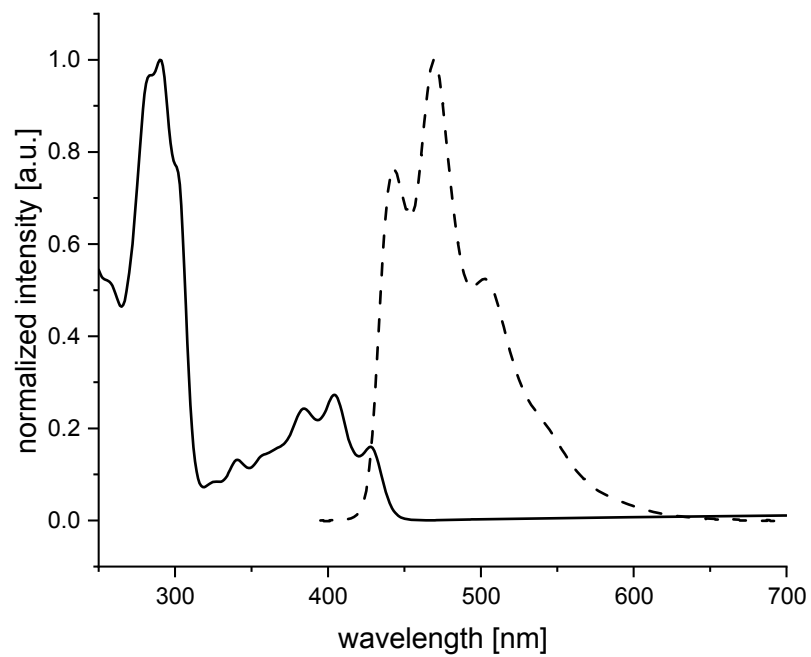

**Figure S101.** Absorption (solid line) and emission (dashed line) spectra of **2a** in cyclohexane.

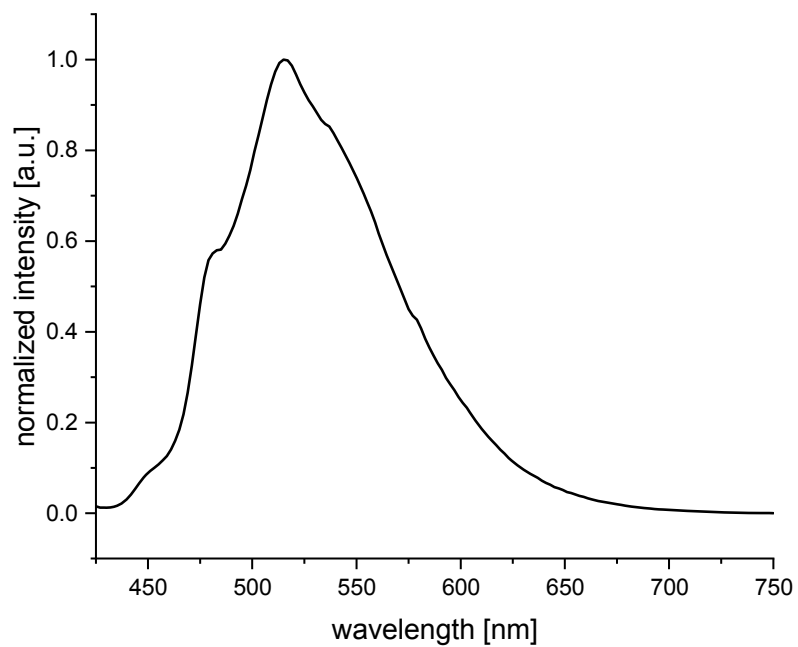

**Figure S102.** Emission spectra of **2a** as powder.

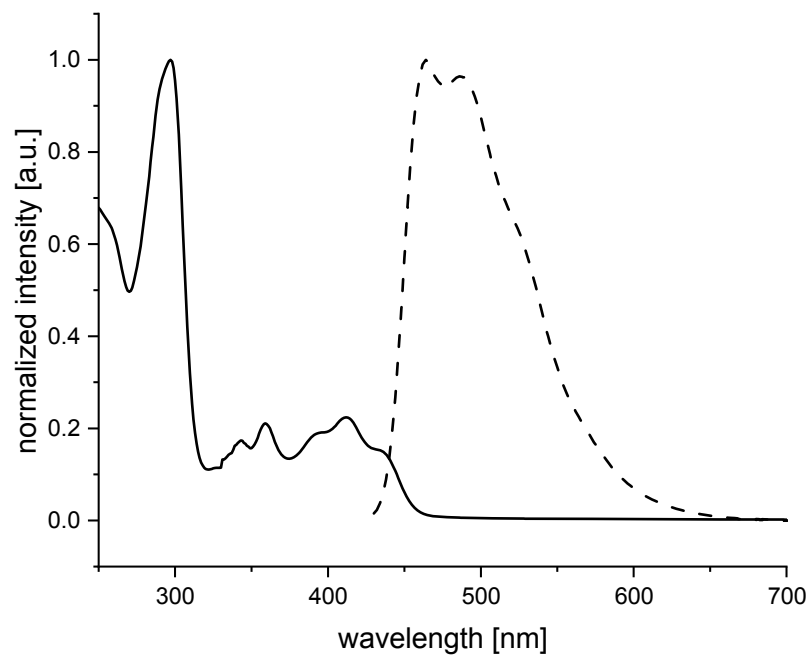

**Figure S103.** Absorption (solid line) and emission (dashed line) spectra of **2b** in DCM.

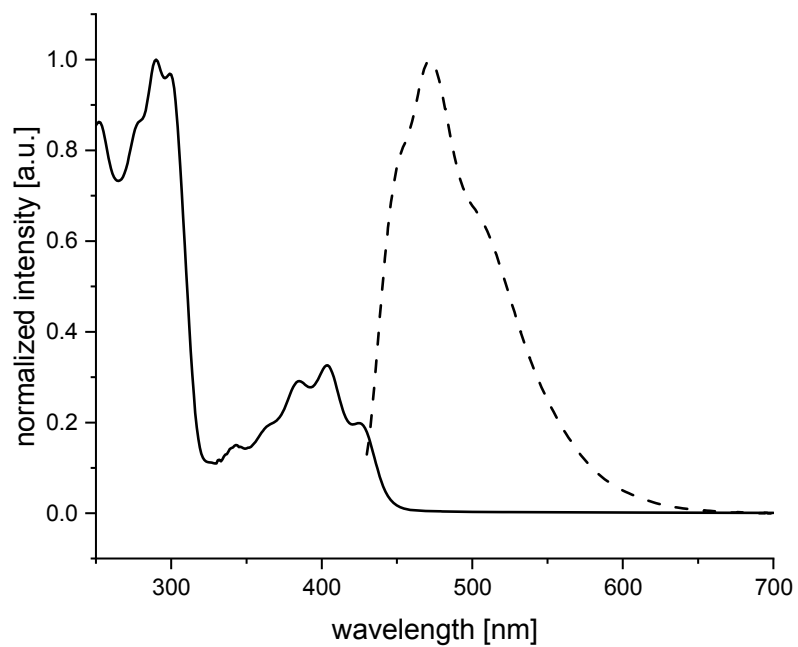

**Figure S104.** Absorption (solid line) and emission (dashed line) spectra of **2c** in DCM.



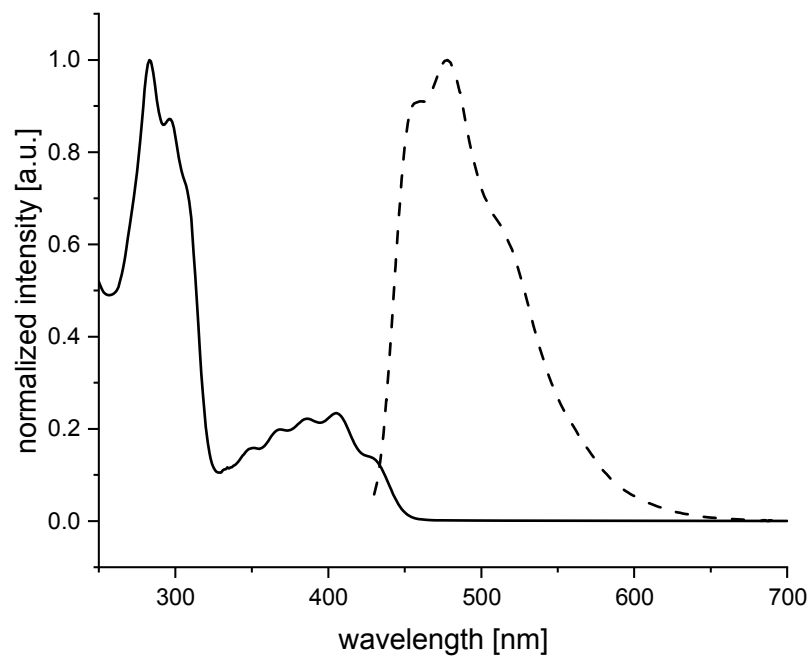

**Figure S105.** Absorption (solid line) and emission (dashed line) spectra of **2d** in DCM.

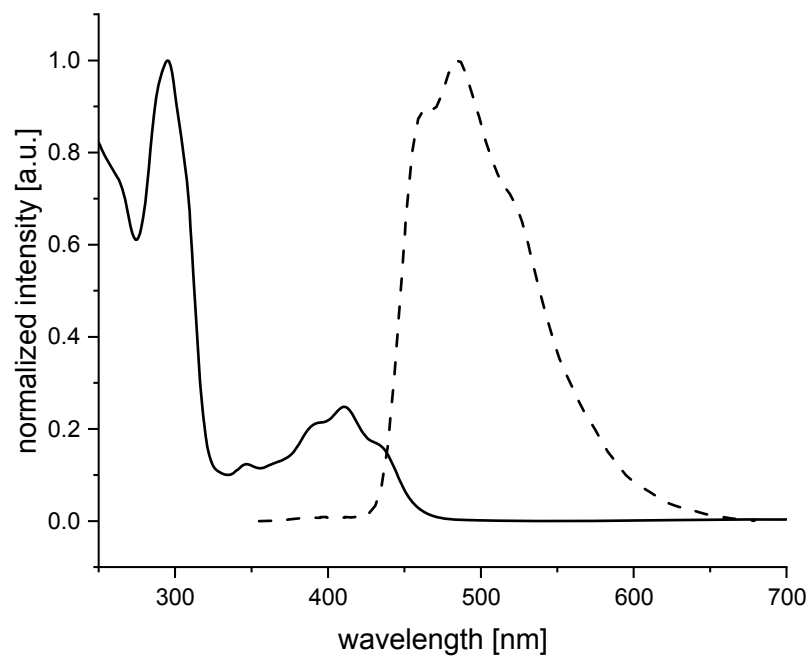

**Figure S106.** Absorption (solid line) and emission (dashed line) spectra of **2e** in DCM.

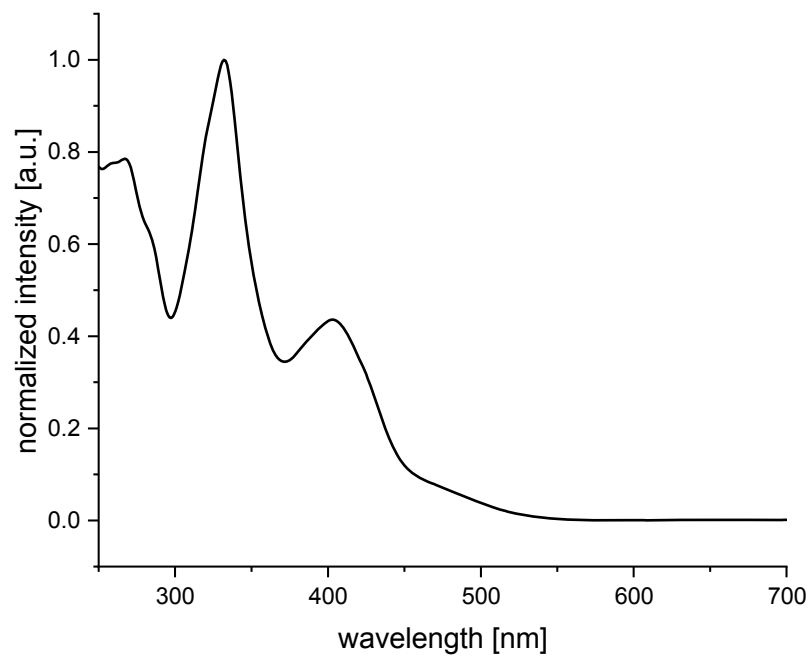

Figure S107. Absorption spectra of 2f in DCM.

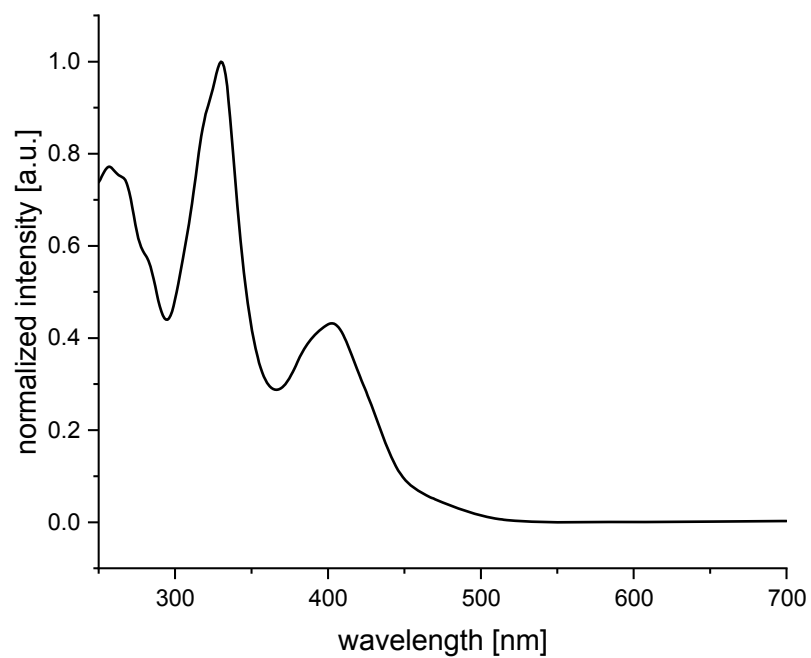

Figure S108. Absorption spectra of 2f in dioxane.

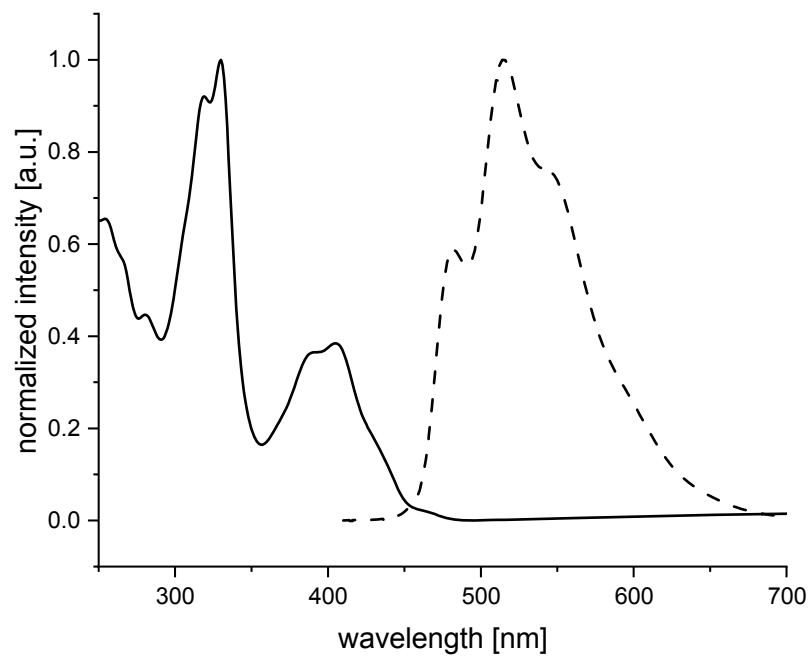

**Figure S109.** Absorption (solid line) and emission (dashed line) spectra of **2f** in cyclohexane.

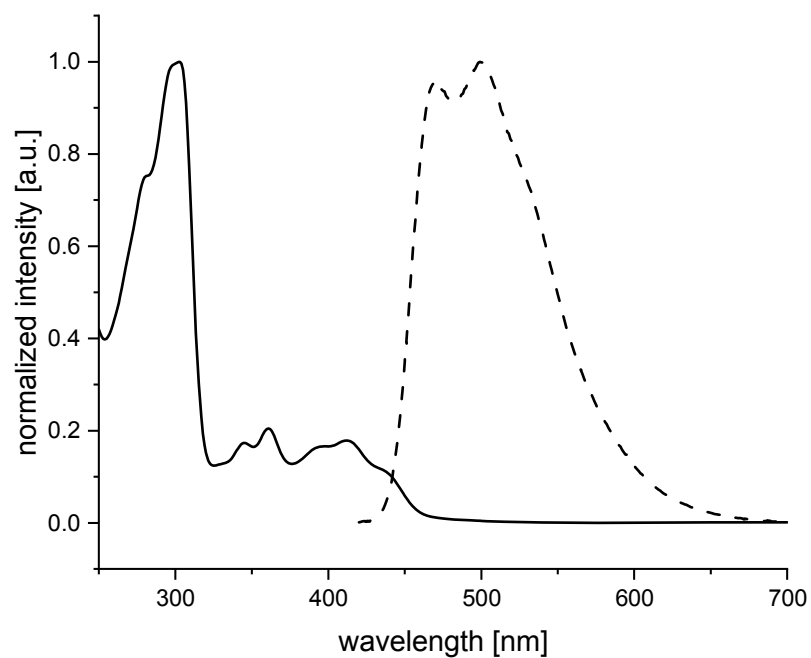

**Figure S110.** Absorption (solid line) and emission (dashed line) spectra of **2g** in DCM.

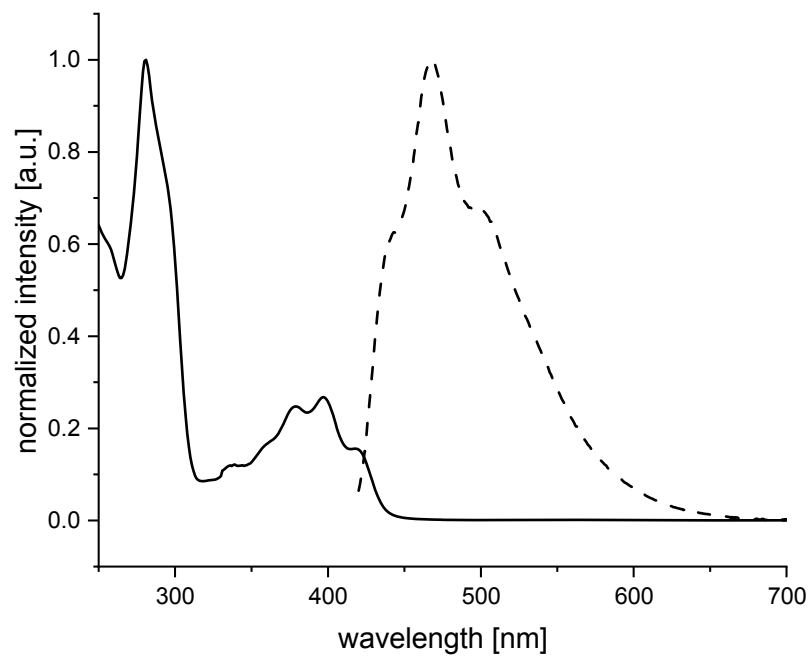

**Figure S111.** Absorption (solid line) and emission (dashed line) spectra of **2h** in DCM.

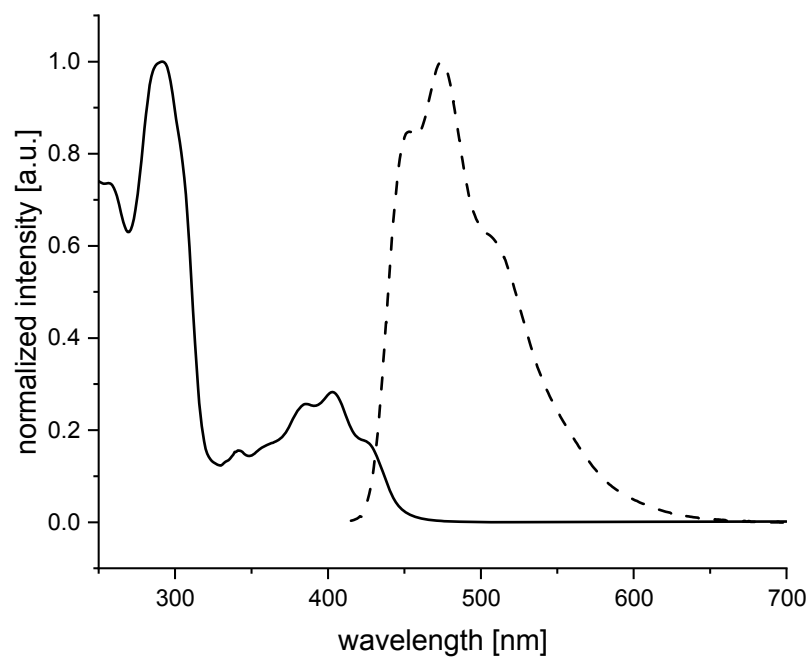

**Figure S112.** Absorption (solid line) and emission (dashed line) spectra of **2i** in DCM.

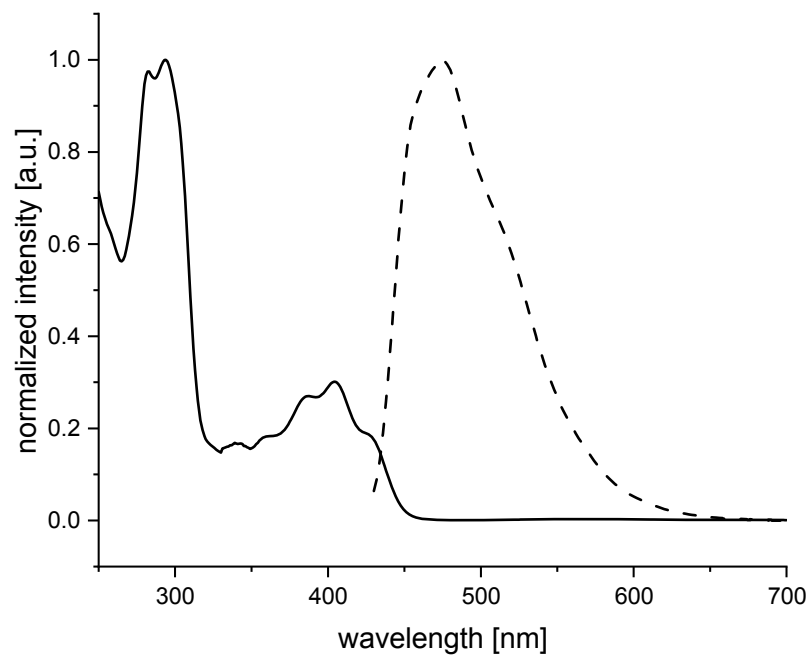

**Figure S113.** Absorption (solid line) and emission (dashed line) spectra of **2j** in DCM.

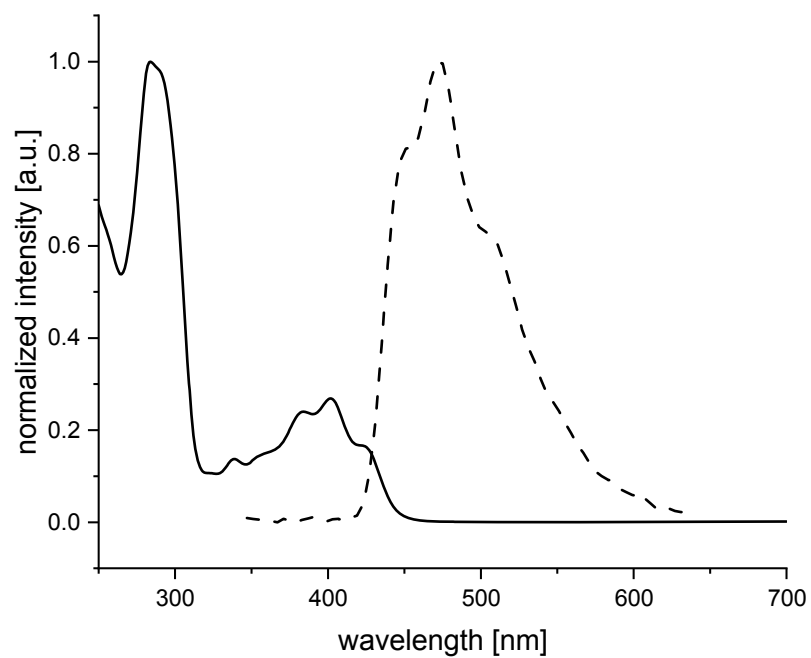

**Figure S114.** Absorption (solid line) and emission (dashed line) spectra of **2k** in DCM.

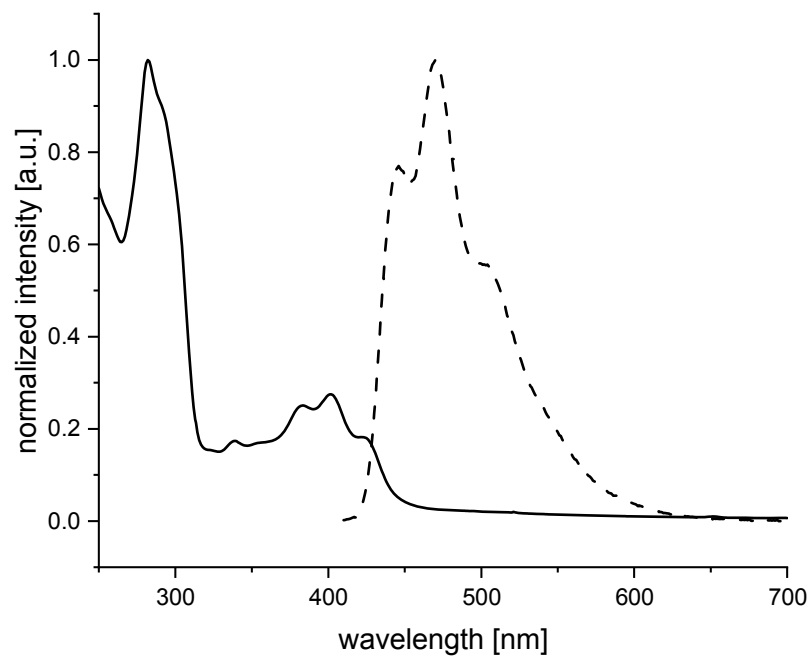

**Figure S115.** Absorption (solid line) and emission (dashed line) spectra of **2l** in DCM.

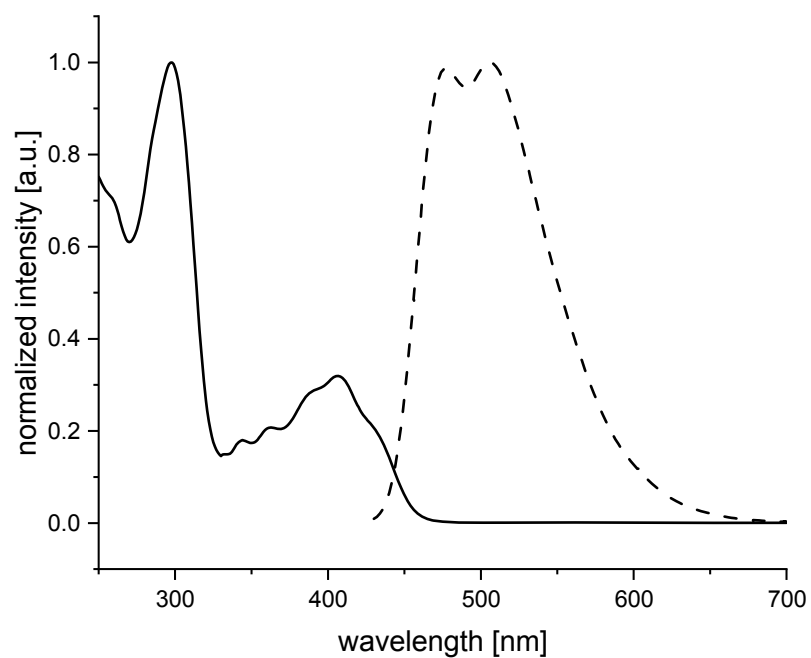

**Figure S116.** Absorption (solid line) and emission (dashed line) spectra of **2m** in DCM.

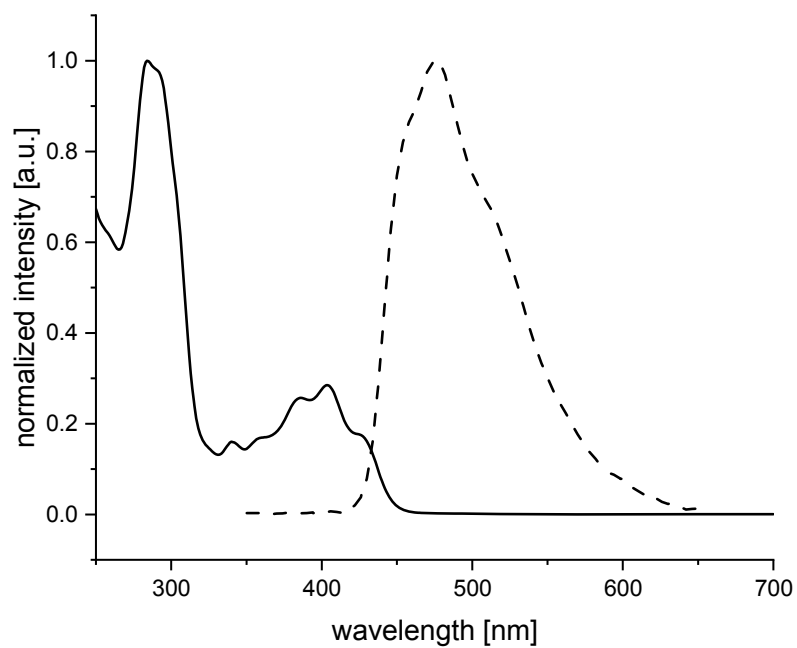

Figure S117. Absorption (solid line) and emission (dashed line) spectra of **2n** in DCM.

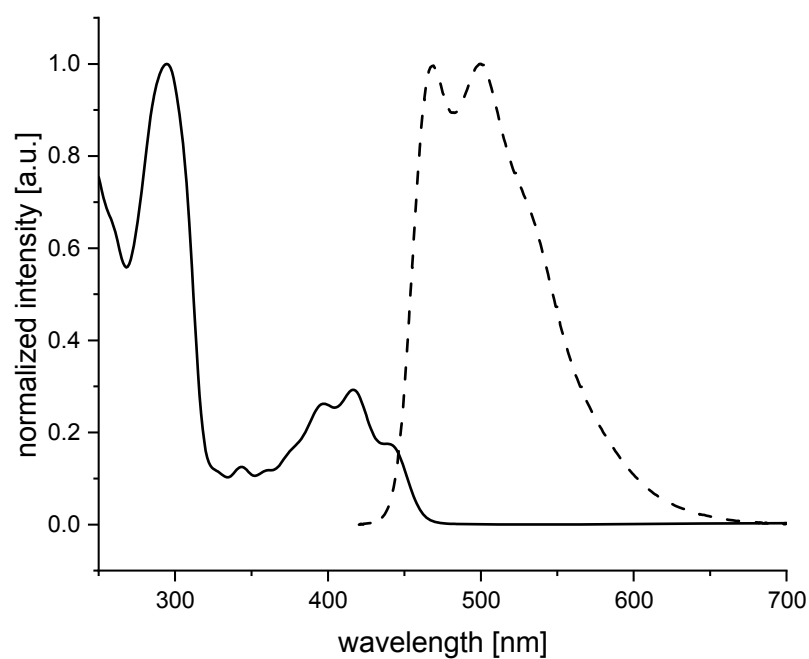

Figure S118. Absorption (solid line) and emission (dashed line) spectra of **2o** in DCM.

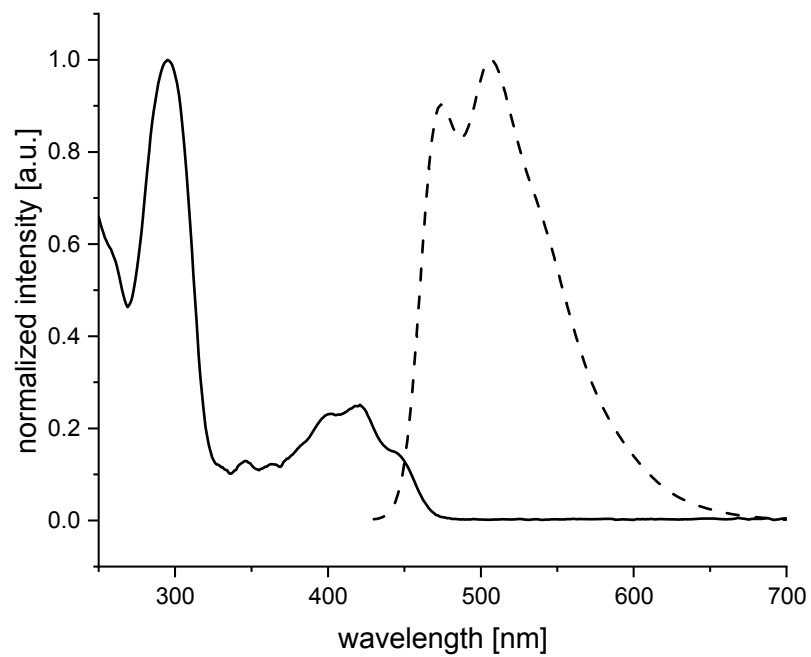

Figure S119. Absorption (solid line) and emission (dashed line) spectra of **2p** in DCM.

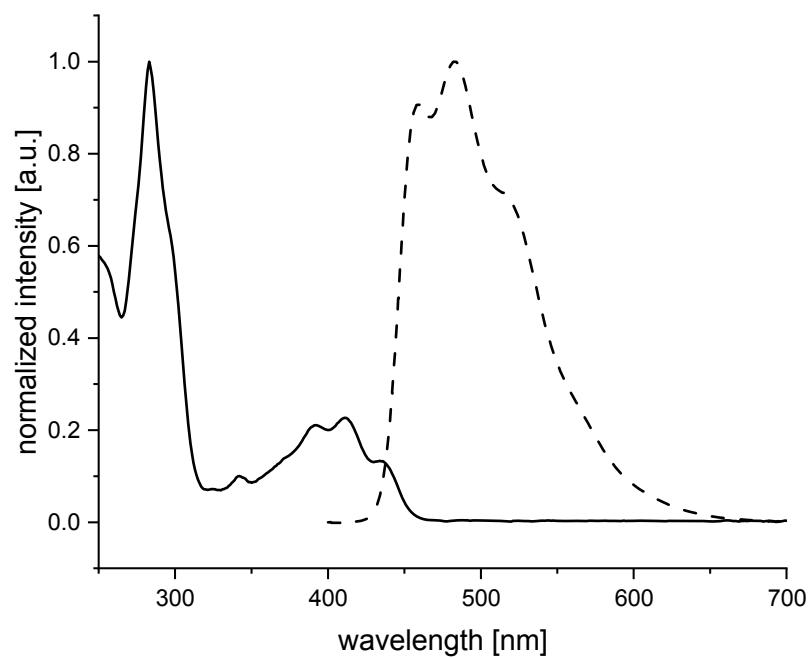

Figure S120. Absorption (solid line) and emission (dashed line) spectra of **2q** in DCM.



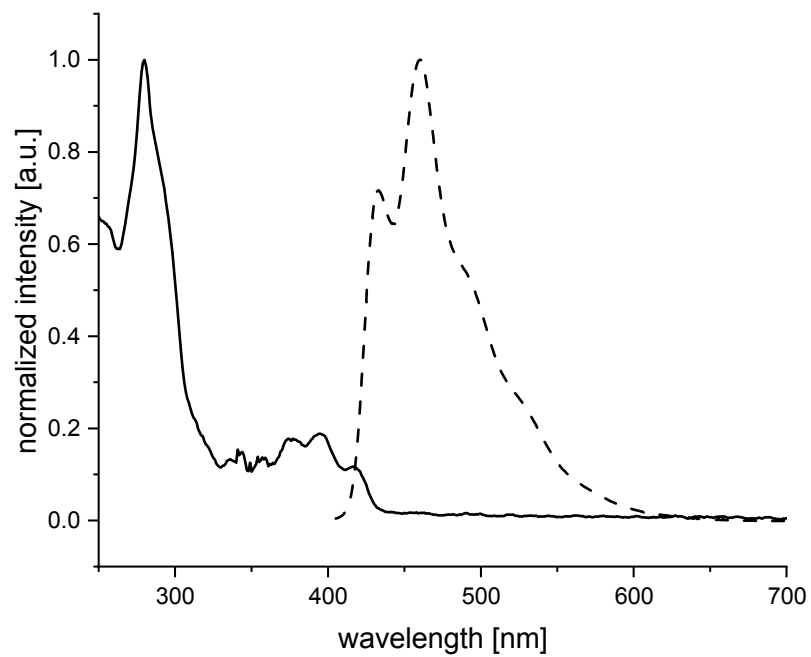

**Figure S121.** Absorption (solid line) and emission (dashed line) spectra of **2r** in DCM.

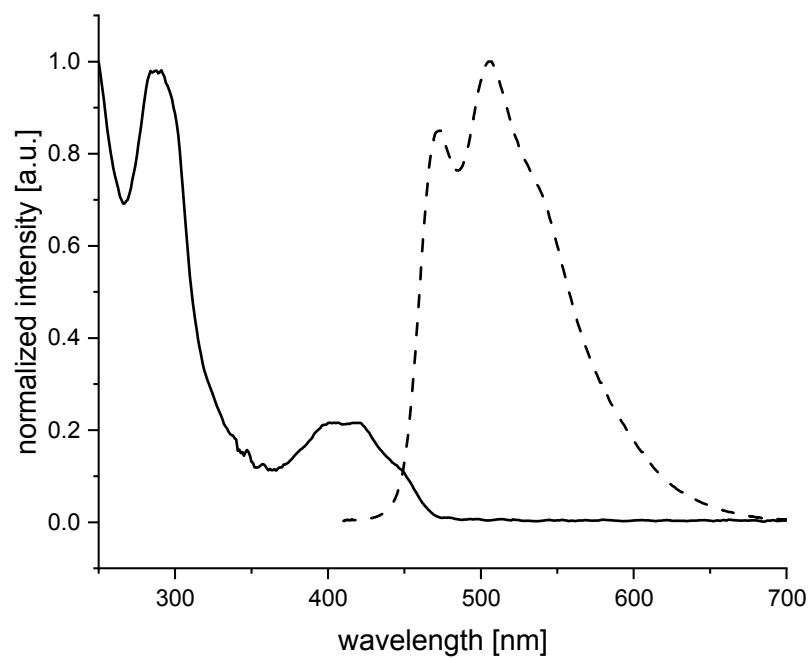

**Figure S122.** Absorption (solid line) and emission (dashed line) spectra of **4** in DCM.

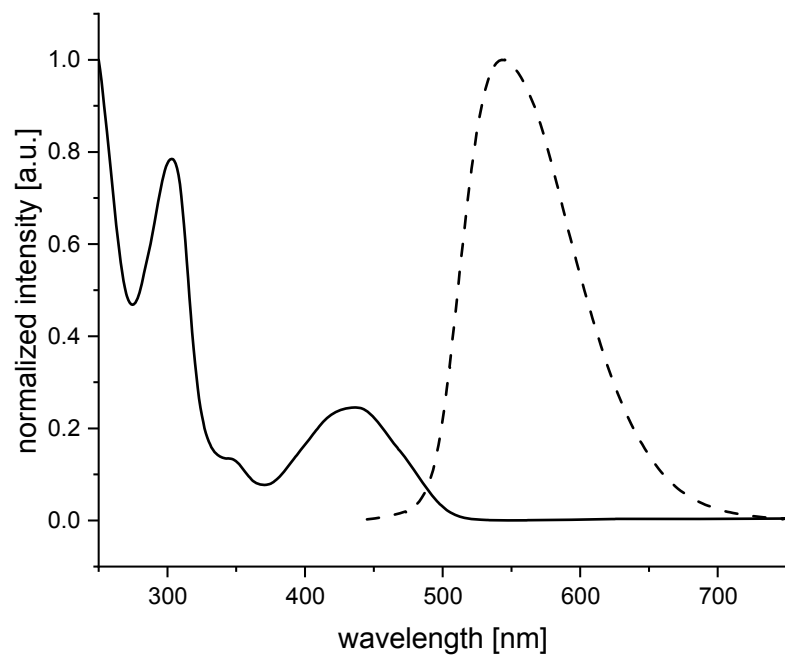

**Figure S123.** Absorption (solid line) and emission (dashed line) spectra of **6** in DCM.

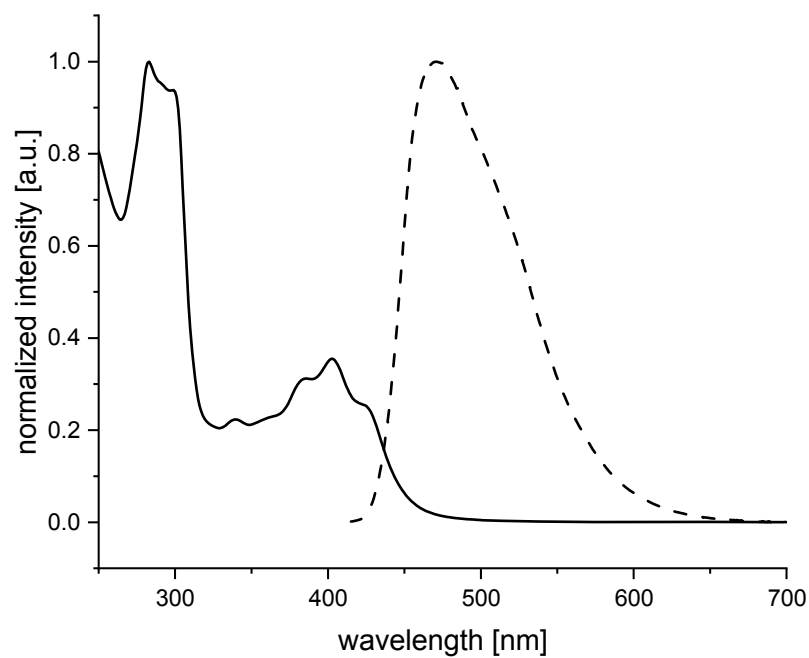

**Figure S124.** Absorption (solid line) and emission (dashed line) spectra of **8** in DCM.

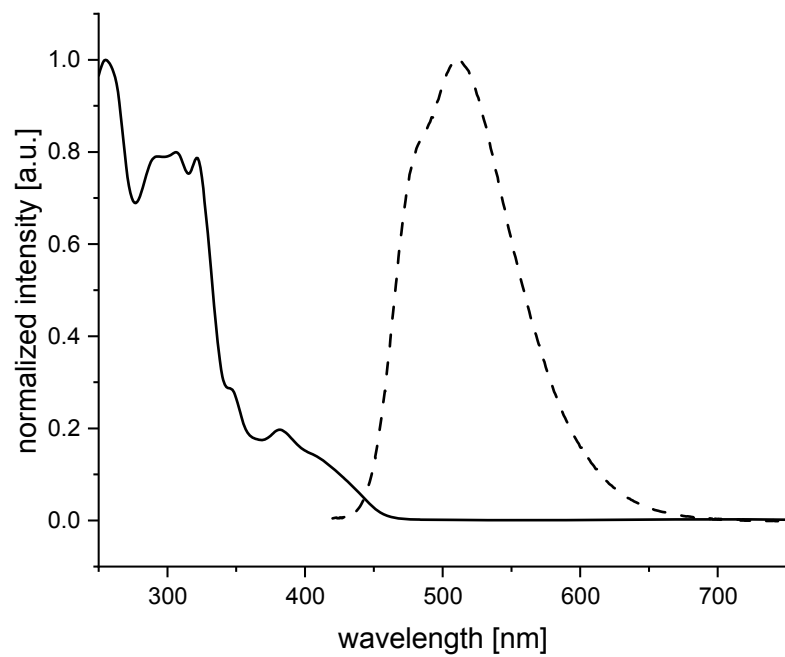

**Figure S125.** Absorption (solid line) and emission (dashed line) spectra of **12** in DCM.

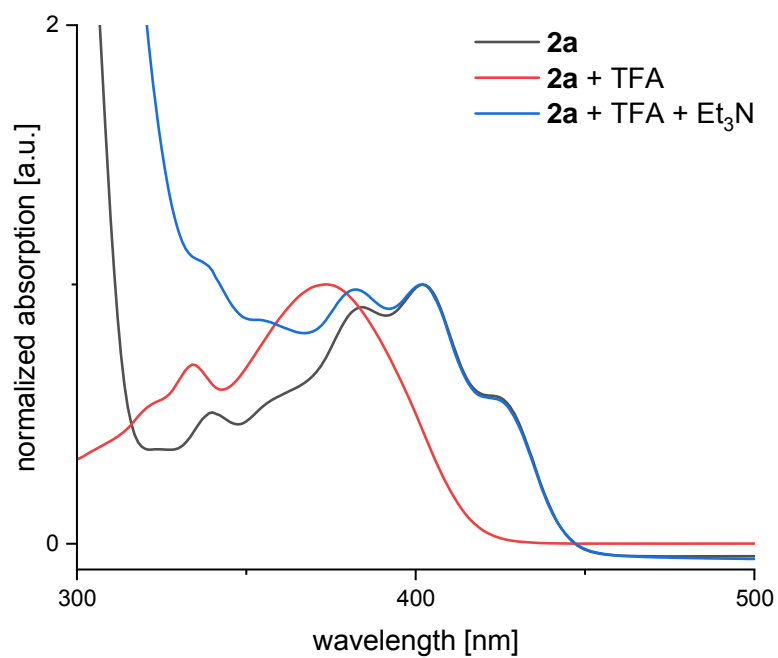

**Figure S126.** Absorption spectra of **2a**, **2a** with addition of trifluoroacetic acid (TFA), and **2a** with addition of TFA and a surplus of  $\text{Et}_3\text{N}$  in DCM.

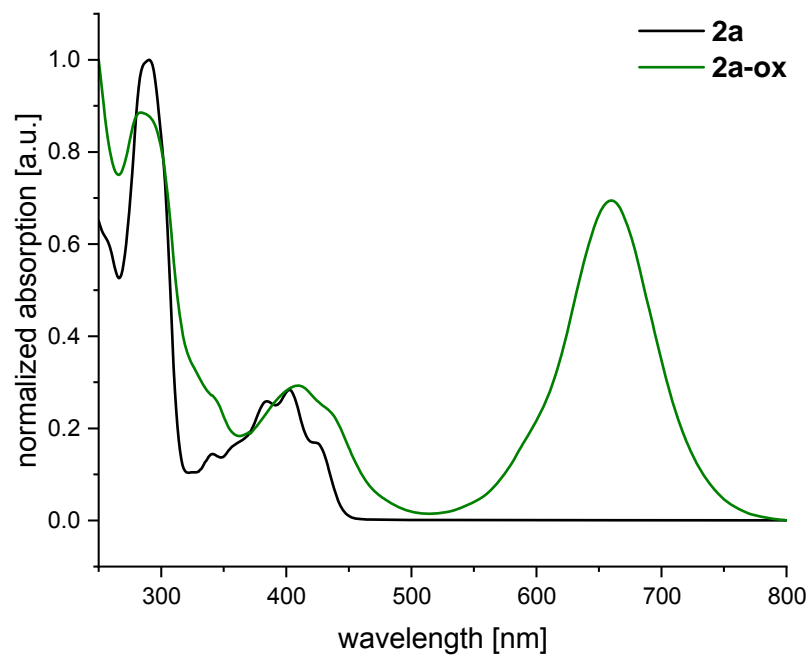

Figure S127. Absorption spectra of 2a and 2a-ox in DCM.

## 4 Crystallographic Data

**Table S2.** Crystal structure, crystal data and structure refinement of **2a** (CCDC 2169589).

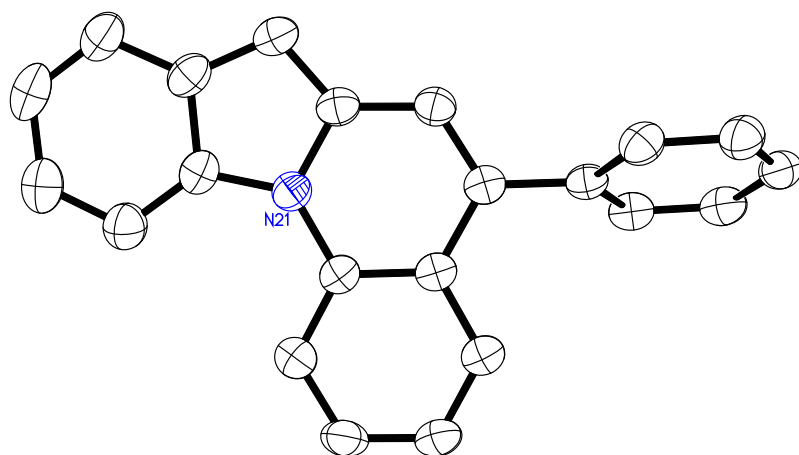

|                                   |                                                                                                                 |
|-----------------------------------|-----------------------------------------------------------------------------------------------------------------|
| Empirical formula                 | C <sub>22</sub> H <sub>15</sub> N                                                                               |
| Formula weight                    | 293.35                                                                                                          |
| Temperature                       | 200(2) K                                                                                                        |
| Wavelength                        | 0.71073 Å                                                                                                       |
| Crystal system                    | monoclinic                                                                                                      |
| Space group                       | P2 <sub>1</sub> /c                                                                                              |
| Z                                 | 4                                                                                                               |
| Unit cell dimensions              | a = 14.0207(13) Å    α = 90 deg.<br>b = 18.8671(17) Å    β = 91.567(2) deg.<br>c = 5.7298(5) Å      γ = 90 deg. |
| Volume                            | 1515.1(2) Å <sup>3</sup>                                                                                        |
| Density (calculated)              | 1.29 g/cm <sup>3</sup>                                                                                          |
| Absorption coefficient            | 0.07 mm <sup>-1</sup>                                                                                           |
| Crystal shape                     | brick                                                                                                           |
| Crystal size                      | 0.093 x 0.045 x 0.041 mm <sup>3</sup>                                                                           |
| Crystal colour                    | yellow                                                                                                          |
| Theta range for data collection   | 1.5 to 27.5 deg.                                                                                                |
| Index ranges                      | -18 ≤ h ≤ 18, -24 ≤ k ≤ 24, -7 ≤ l ≤ 7                                                                          |
| Reflections collected             | 16192                                                                                                           |
| Independent reflections           | 3403 (R(int) = 0.0507)                                                                                          |
| Observed reflections              | 2015 (I > 2σ(I))                                                                                                |
| Absorption correction             | Semi-empirical from equivalents                                                                                 |
| Max. and min. transmission        | 0.96 and 0.90                                                                                                   |
| Refinement method                 | Full-matrix least-squares on F <sup>2</sup>                                                                     |
| Data/restraints/parameters        | 3403 / 0 / 208                                                                                                  |
| Goodness-of-fit on F <sup>2</sup> | 1.05                                                                                                            |
| Final R indices (I > 2σ(I))       | R1 = 0.056, wR2 = 0.131                                                                                         |
| Largest diff. peak and hole       | 0.15 and -0.18 eÅ <sup>-3</sup>                                                                                 |

**Table S3.** Crystal structure, crystal data and structure refinement of **3a** (CCDC 2169590).

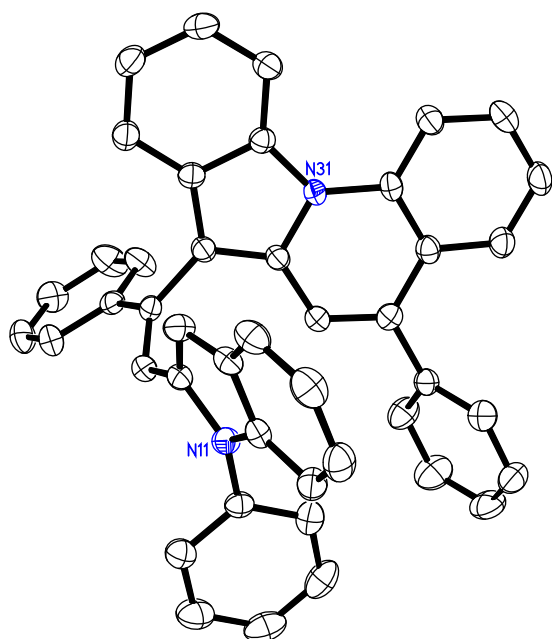

|                                   |                                                |                             |
|-----------------------------------|------------------------------------------------|-----------------------------|
| Empirical formula                 | C <sub>44</sub> H <sub>30</sub> N <sub>2</sub> |                             |
| Formula weight                    | 586.70                                         |                             |
| Temperature                       | 200(2) K                                       |                             |
| Wavelength                        | 0.71073 Å                                      |                             |
| Crystal system                    | triclinic                                      |                             |
| Space group                       | P $\bar{1}$                                    |                             |
| Z                                 | 2                                              |                             |
| Unit cell dimensions              | a = 9.1982(5) Å                                | $\alpha$ = 97.6574(12) deg. |
|                                   | b = 10.6715(6) Å                               | $\beta$ = 106.2367(12) deg. |
|                                   | c = 16.2921(9) Å                               | $\gamma$ = 91.1132(13) deg. |
| Volume                            | 1519.03(15) Å <sup>3</sup>                     |                             |
| Density (calculated)              | 1.28 g/cm <sup>3</sup>                         |                             |
| Absorption coefficient            | 0.07 mm <sup>-1</sup>                          |                             |
| Crystal shape                     | cuboid                                         |                             |
| Crystal size                      | 0.150 x 0.130 x 0.086 mm <sup>3</sup>          |                             |
| Crystal colour                    | yellow                                         |                             |
| Theta range for data collection   | 1.3 to 27.7 deg.                               |                             |
| Index ranges                      | -11 ≤ h ≤ 11, -13 ≤ k ≤ 13, -21 ≤ l ≤ 21       |                             |
| Reflections collected             | 21096                                          |                             |
| Independent reflections           | 6264 (R(int) = 0.0393)                         |                             |
| Observed reflections              | 4374 (I > 2σ(I))                               |                             |
| Absorption correction             | Semi-empirical from equivalents                |                             |
| Max. and min. transmission        | 0.96 and 0.92                                  |                             |
| Refinement method                 | Full-matrix least-squares on F <sup>2</sup>    |                             |
| Data/restraints/parameters        | 6264 / 0 / 415                                 |                             |
| Goodness-of-fit on F <sup>2</sup> | 1.02                                           |                             |
| Final R indices (I > 2σ(I))       | R1 = 0.048, wR2 = 0.103                        |                             |
| Largest diff. peak and hole       | 0.17 and -0.21 eÅ <sup>-3</sup>                |                             |

## 5 Computational Investigation

### 5.1 Computational Details

Calculations were carried out at the B3LYP-D3/6-31G\*\*/LACVP(Au)//cc-pVTZ(-f)/LACV3P(Au)<sup>[17]</sup> level of theory. All calculations were carried out using DFT<sup>[18]</sup> as implemented in the Jaguar 9.1 suite<sup>[19]</sup> of ab initio quantum chemistry programs. Orbital visualizations were done with IboView.<sup>[20]</sup> Geometry optimizations were performed with B3LYP-D3 functional and the 6-31G\*\*/LACVP(Au) basis set. The energies of the optimized structures were reevaluated by additional single-point calculations on each optimized geometry using Dunning's correlation consistent triple- $\zeta$  basis set cc-pVTZ(-f), which includes a double set of polarization functions. For gold, we used a modified version of LACVP, designated as LACV3P, in which the exponents were decontracted to match the effective core potential with triple- $\zeta$  quality. Solvation energies were evaluated by a self-consistent reaction field (SCRF) approach based on accurate numerical solutions of the Poisson-Boltzmann equation with the dielectric constant  $\epsilon = 9.93$  for *ortho*-dichlorobenzene. As is the case for all continuum models, the solvation energies are subject to empirical parameterization of the atomic radii that are used to generate the solute surface. We employed the standard set of optimized radii in Jaguar. Analytical vibrational frequencies within the harmonic approximation were computed with the 6-31G\*\*/LACVP basis to confirm proper convergence to well-defined minima or saddle points on the potential energy surface. The energy components have been computed with the following protocol.

The free energy in the solution-phase  $G(\text{sol})$  has been calculated as follows:

$$G(\text{sol}) = G(\text{gas}) + G_{\text{solv}} \quad (1)$$

Low frequencies were corrected using Truhlar's quasiharmonic protocol, i.e. all frequencies lower than  $100 \text{ cm}^{-1}$  were raised to  $100 \text{ cm}^{-1}$  before evaluating their contribution to the entropy.<sup>[21]</sup>  $G(\text{gas})$  was then derived from the Gibbs-Helmholtz equation with the entropy  $S(\text{gas})$  retrieved from harmonic vibration calculations:

$$G(\text{gas}) = H(\text{gas}) - TS(\text{gas}) \quad (2)$$

$H(\text{gas})$  is the electronic energy from a self-consistent field optimization  $E(\text{SCF})$  at the higher level single point calculation as detailed above corrected for the zero-point energy ZPE from harmonic vibration calculations:

$$H(\text{gas}) = E(\text{SCF}) + \text{ZPE} \quad (3)$$

Hess's law is applied for calculating reaction energies  $\Delta E(\text{SCF})$  and  $\Delta G(\text{sol})$  as shown below:

$$\Delta E(\text{SCF}) = \sum E(\text{SCF}) \text{ for products} - \sum E(\text{SCF}) \text{ for reactants} \quad (4)$$

$$\Delta G(\text{sol}) = \sum G(\text{sol}) \text{ for products} - \sum G(\text{sol}) \text{ for reactants} \quad (5)$$

The entropy we refer to is specifically vibrational/rotational/translational entropy of the solute(s), and the entropy of the solvent is implicitly included in the continuum solvation model.

## 5.2 Overview of the Computed Molecules

The optimized geometries of **1a**, **1a**<sup>[Au]</sup>, **IMeAu**<sup>+</sup>, **2a**<sup>[Au]-TS</sup>, **2a**<sup>[Au]</sup>, **3a**<sup>[Au]-TS</sup>, **3a**<sup>[Au]</sup>, **3b**<sup>[Au]-TS</sup>, **3b**<sup>[Au]</sup>, **3c**<sup>[Au]-TS</sup>, **3c**<sup>[Au]</sup>, **3d**<sup>[Au]-TS</sup>, **3d**<sup>[Au]</sup>, **2a**, **2f**, **2h**, **2o**, **2r**, **6**, **8**, **10**, **12**, **3a**, **3b**, **3c**, **3d**, **IPrAu**<sup>+</sup>, **1a**<sup>[IPrAu]</sup>, **2a**<sup>[IPrAu]</sup>, and **3b**<sup>[IPrAu]</sup> can be found in the xyz file that is supplied in the supporting documents of this publication.

**Table S4.** Energies of all computed structures.

| Entry | Label                                       | E(SCF)/TZ<br>eV | ZPE<br>kcal/mol | H<br>eV    | S<br>cal/mol·K | G(gas)<br>eV | G <sub>solv</sub><br>kcal/mol | G(sol)<br>eV | G(sol)<br>kcal/mol |
|-------|---------------------------------------------|-----------------|-----------------|------------|----------------|--------------|-------------------------------|--------------|--------------------|
| 1     | <b>1a</b>                                   | -24555.135      | 189.153         | -24546.933 | 130.847        | -24549.277   | -6.99                         | -24549.580   | -566126.626        |
| 2     | <b>1a</b> <sup>[Au]</sup>                   | -36535.919      | 271.140         | -36524.161 | 175.859        | -36527.312   | -37.53                        | -36528.939   | -842377.152        |
| 3     | <b>IMeAu</b> <sup>+</sup>                   | -11978.555      | 81.472          | -11975.022 | 95.471         | -11976.733   | -54.60                        | -11979.100   | -276244.546        |
| 4     | <b>2a</b> <sup>[Au]-TS</sup>                | -36535.067      | 271.125         | -36523.310 | 171.987        | -36526.391   | -37.30                        | -36528.009   | -842355.690        |
| 5     | <b>2a</b> <sup>[Au]</sup>                   | -36535.526      | 272.143         | -36523.725 | 170.997        | -36526.788   | -39.15                        | -36528.486   | -842366.697        |
| 6     | <b>3a</b> <sup>[Au]-TS</sup> <sup>[a]</sup> | -61092.984      | 463.505         | -61072.885 | 241.970        | -61077.220   | -36.99                        | -61078.824   | -1408510.797       |
| 7     | <b>3a</b> <sup>[Au]</sup>                   | -61093.922      | 465.313         | -61073.744 | 240.224        | -61078.048   | -37.97                        | -61079.694   | -1408530.878       |
| 8     | <b>3b</b> <sup>[Au]-TS</sup>                | -61093.188      | 463.763         | -61073.077 | 240.291        | -61077.382   | -36.20                        | -61078.952   | -1408513.760       |
| 9     | <b>3b</b> <sup>[Au]</sup>                   | -61094.146      | 465.285         | -61073.969 | 240.523        | -61078.279   | -37.60                        | -61079.909   | -1408535.825       |
| 10    | <b>3c</b> <sup>[Au]-TS</sup> <sup>[a]</sup> | -61092.841      | 463.511         | -61072.741 | 241.472        | -61077.067   | -37.71                        | -61078.703   | -1408508.008       |
| 11    | <b>3c</b> <sup>[Au]</sup>                   | -61093.935      | 465.854         | -61073.734 | 238.718        | -61078.010   | -42.57                        | -61079.857   | -1408534.615       |
| 12    | <b>3d</b> <sup>[Au]-TS</sup>                | -61092.783      | 463.909         | -61072.666 | 239.526        | -61076.957   | -36.92                        | -61078.558   | -1408504.678       |
| 13    | <b>3d</b> <sup>[Au]</sup>                   | -61093.971      | 465.194         | -61073.798 | 240.001        | -61078.098   | -39.13                        | -61079.795   | -1408533.195       |
| 14    | <b>2a</b>                                   | -24556.795      | 191.312         | -24548.499 | 124.115        | -24550.723   | -6.55                         | -24551.007   | -566159.526        |
| 15    | <b>2f</b>                                   | -30123.549      | 192.989         | -30115.180 | 135.060        | -30117.600   | -10.39                        | -30118.050   | -694538.577        |
| 16    | <b>2h</b>                                   | -30978.440      | 296.703         | -30965.574 | 162.598        | -30968.487   | -6.00                         | -30968.747   | -714156.100        |
| 17    | <b>2o</b>                                   | -32986.939      | 276.864         | -32974.933 | 157.508        | -32977.755   | -7.21                         | -32978.068   | -760492.123        |
| 18    | <b>2r</b>                                   | -18267.389      | 140.448         | -18261.299 | 103.389        | -18263.151   | -5.59                         | -18263.393   | -421163.754        |
| 19    | <b>6</b>                                    | -49081.264      | 370.769         | -49065.186 | 191.480        | -49068.616   | -10.62                        | -49069.077   | -1131559.526       |
| 20    | <b>8</b>                                    | -49081.039      | 369.449         | -49065.018 | 192.130        | -49068.460   | -10.45                        | -49068.914   | -1131555.756       |
| 21    | <b>10</b>                                   | -49081.039      | 370.443         | -49064.975 | 191.8773       | -49068.413   | -10.59                        | -49068.872   | -1131554.797       |



|    |                              |            |          |             |          |             |        |             |              |
|----|------------------------------|------------|----------|-------------|----------|-------------|--------|-------------|--------------|
| 22 | <b>12</b>                    | -26631.674 | 199.588  | -26623.019  | 126.313  | -26625.282  | -6.86  | -26625.580  | -614000.303  |
| 23 | <b>3a</b>                    | -49113.666 | 382.524  | -49097.078  | 197.557  | -49100.618  | -10.36 | -49101.067  | -1132297.230 |
| 24 | <b>3b</b>                    | -49113.794 | 382.702  | -49097.198  | 197.281  | -49100.733  | -10.50 | -49101.188  | -1132300.029 |
| 25 | <b>3c</b>                    | -49113.625 | 383.321  | -49097.003  | 197.023  | -49100.532  | -10.57 | -49100.991  | -1132295.476 |
| 26 | <b>3d</b>                    | -49113.778 | 383.177  | -49097.162  | 196.555  | -49100.683  | -9.94  | -49101.114  | -1132298.325 |
| 27 | IPrAu <sup>+</sup>           | -35260.441 | 360.3438 | -35244.815  | 188.203  | -35248.1868 | -46.29 | -35250.1942 | -812888.5935 |
| 28 | <b>1a</b> <sup>[IPrAu]</sup> | -59817.879 | 551.266  | -59793.9738 | 262.3776 | -59798.6746 | -33.91 | -59800.145  | -1379023.774 |
| 29 | <b>2a</b> <sup>[IPrAu]</sup> | -59817.286 | 551.6878 | -59793.3626 | 257.7641 | -59797.9806 | -37.19 | -59799.5933 | -1379011.052 |
| 30 | <b>3b</b> <sup>[IPrAu]</sup> | -84375.991 | 744.9128 | -84343.6885 | 325.776  | -84349.5251 | -35.01 | -84351.0433 | -1945180.801 |

<sup>[a]</sup> We were not able to remove two additional low imaginary frequencies of circa 10 cm<sup>-1</sup> in **3a**<sup>[Au]</sup>-**TS** and **3c**<sup>[Au]</sup>-**TS** corresponding to rotations of methyl groups. These vibrational modes were treated as low positive vibrations and set to 100 cm<sup>-1</sup> within the applied quasiharmonic correction.

### 5.3 Frontier Orbitals of 2a/f/h/o/r, 6, 8, 10 and 12

We found the HOMO-LUMO gap in **2f** (2.70 eV) to be 0.78 to 0.9 eV lower than in all other comparable compounds **2**. The optical gap was accordingly observed to be 0.29 eV lower (2.36 eV) than the next lowest example **2p**. This can easily be rationalized by the nitro-substituent on the non-annulated phenyl substituent which creates a localized LUMO that is energetically much lower than the typically observed excitation. The orbital that we usually expect to participate in the first excitation is found as LUMO+1 in **2f**.

**Table S5.** Relevant orbitals of **2a** and **2f**.<sup>[a]</sup>

| Entry | Compound  | HOMO                                                                                                     | LUMO                                                                                                                                        | LUMO+1                                                                                                                                       |
|-------|-----------|----------------------------------------------------------------------------------------------------------|---------------------------------------------------------------------------------------------------------------------------------------------|----------------------------------------------------------------------------------------------------------------------------------------------|
| 1     | <b>2a</b> | 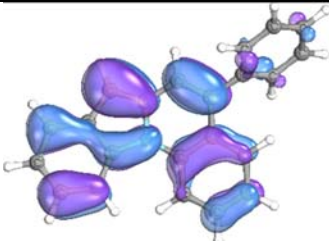<br>$\epsilon = -5.19$  | <br>$\epsilon = -1.72$ ( $\Delta_{\text{HOMO}} = 3.48$ )  |                                                                                                                                              |
| 2     | <b>2f</b> | <br>$\epsilon = -5.50$ | <br>$\epsilon = -2.81$ ( $\Delta_{\text{HOMO}} = 2.69$ ) | <br>$\epsilon = -1.93$ ( $\Delta_{\text{HOMO}} = 3.57$ ) |

<sup>[a]</sup>Orbital energies ( $\epsilon$ ) and gaps to the HOMO ( $\Delta_{\text{HOMO}}$ ) given in eV.

**Table S6.** Frontier orbitals of selected products and the respective gap.

|           | $\epsilon_{\text{HOMO}}$ [eV] | $\epsilon_{\text{LUMO}}$ [eV] | Gap [eV] |
|-----------|-------------------------------|-------------------------------|----------|
| <b>2a</b> | -5.192                        | -1.712                        | 3.480    |
| <b>2f</b> | -5.505                        | -2.805                        | 2.699    |
| <b>2h</b> | -5.108                        | -1.604                        | 3.503    |
| <b>2o</b> | -5.145                        | -1.764                        | 3.382    |
| <b>2r</b> | -5.244                        | -1.639                        | 3.605    |
| <b>6</b>  | -4.752                        | -1.788                        | 2.965    |
| <b>8</b>  | -5.055                        | -1.884                        | 3.171    |
| <b>10</b> | -4.745                        | -1.812                        | -2.934   |
| <b>12</b> | -5.274                        | -1.865                        | 3.409    |

## 6 References

- [1] G. R. Fulmer, A. J. M. Miller, N. H. Sherden, H. E. Gottlieb, A. Nudelman, B. M. Stoltz, J. E. Bercaw, K. I. Goldberg, *Organometallics* **2010**, *29*, 2176–2179.
- [2] a) G. Berthon-Gelloz, M. A. Siegler, A. L. Spek, B. Tinant, J. N. H. Reek, I. E. Markó, *Dalton Trans.* **2010**, *39*, 1444–1446; b) A. Gómez-Suárez, R. S. Ramón, O. Songis, A. M. Z. Slawin, C. S. J. Cazin, S. P. Nolan, *Organometallics* **2011**, *30*, 5463–5470.
- [3] A. Cervantes-Reyes, F. Rominger, M. Rudolph, A. S. K. Hashmi, *Chem. Eur. J.* **2019**, *25*, 11745–11757.
- [4] Y.-Q. Fang, M. Lautens, *Org. Lett.* **2005**, *7*, 3549–3552.
- [5] M. Nagamochi, Y.-Q. Fang, M. Lautens, *Org. Lett.* **2007**, *9*, 2955–2958.
- [6] P. Kochapradist, T. Sunonnam, N. Prachumrak, S. Namuangruk, T. Keawin, S. Jungsuttiwong, T. Sudyoadsuk, V. Promarak, *Tetrahedron Lett.* **2014**, *55*, 6689–6693.
- [7] T. Kurisaki, T. Naniwa, H. Yamamoto, H. Imagawa, M. Nishizawa, *Tetrahedron Lett.* **2007**, *48*, 1871–1874.
- [8] M. X.-W. Jiang, M. Rawat, W. D. Wulff, *J. Am. Chem. Soc.* **2004**, *126*, 5970–5971.
- [9] B. S. Chinta, B. Baire, *RSC Adv.* **2016**, *6*, 54449–54455.
- [10] V. Fiandanese, D. Bottalico, G. Marchese, A. Punzi, *Tetrahedron* **2008**, *64*, 7301–7306.
- [11] H. Chen, M. Lei, L. Hu, *Tetrahedron* **2014**, *70*, 5626–5631.
- [12] B. V. Subba Reddy, R. Anji Babu, B. Jagan Mohan Reddy, B. Sridhar, T. Ramalinga Murthy, P. Pranathi, S. V. Kalivendi, T. Prabhakar Rao, *RSC Adv.* **2015**, *5*, 27476–27480.
- [13] Y. Liang, T. Meng, H.-J. Zhang, Z. Xi, *Synlett* **2011**, *2011*, 911–914.
- [14] C. M. Hendrich, V. D. Hannibal, L. Eberle, L. E. Hertwig, U. Zschieschang, F. Rominger, M. Rudolph, H. Klauk, A. S. K. Hashmi, *Adv. Synth. Catal.* **2021**, *363*, 1401–1407.
- [15] D. G. Hulcoop, M. Lautens, *Org. Lett.* **2007**, *9*, 1761–1764.
- [16] A. Rana, S. Lee, D. Kim, P. K. Panda, *Chem. Eur. J.* **2015**, *21*, 12129–12135.
- [17] a) A. D. Becke, *J. Chem. Phys.* **1993**, *98*, 5648–5652; b) S. Grimme, J. Antony, S. Ehrlich, H. Krieg, *J. Chem. Phys.* **2010**, *132*, 154104; c) P. C. Hariharan, J. A. Pople, *Theoret. Chim. Acta* **1973**, *28*, 213–222; d) P. J. Hay, W. R. Wadt, *J. Chem. Phys.* **1985**, *82*, 299–310; e) Lee, Yang, Parr, *Phys. Rev. B* **1988**, *37*, 785–789; f) B. Marten, K. Kim, C. Cortis, R. A. Friesner, R. B. Murphy, M. N. Ringnalda, D. Sitkoff, B. Honig, *J. Phys. Chem.* **1996**, *100*, 11775–11788.
- [18] R. G. Parr, W. Yang, *Density-Functional Theory of Atoms and Molecules*, Oxford University Press, New York, NY, **1994**.
- [19] A. D. Bochevarov, E. Harder, T. F. Hughes, J. R. Greenwood, D. A. Braden, D. M. Philipp, D. Rinaldo, M. D. Halls, J. Zhang, R. A. Friesner, *Int. J. Quantum Chem.* **2013**, *113*, 2110–2142.
- [20] G. Knizia, *J. Chem. Theory Comput.* **2013**, *9*, 4834–4843.
- [21] R. F. Ribeiro, A. V. Marenich, C. J. Cramer, D. G. Truhlar, *J. Phys. Chem. B* **2011**, *115*, 14556–14562.
